# Supplementary material for: Copper-catalyzed condensation of imines and α-diazo-β-dicarbonyl compounds: modular and regiocontrolled synthesis of multisubstituted pyrroles
Source: Royal Society of Chemistry journal article supplement (doi:10.1039/c5sc02322j), 2015-01-01

## Electronic Supplementary Information

### Copper-Catalyzed Condensation of Imines and $\alpha$ -Diazo- $\beta$ -dicarbonyl Compounds: Modular and Regiocontrolled Synthesis of Multisubstituted Pyrroles

Wei Wen Tan and Naohiko Yoshikai

*Division of Chemistry and Biological Chemistry, School of Physical and Mathematical  
Sciences, Nanyang Technological University, Singapore 637371*

## Contents

|                                                                                    |     |
|------------------------------------------------------------------------------------|-----|
| Materials and Methods.....                                                         | S2  |
| Preparation of Starting Materials.....                                             | S3  |
| Cu-Catalyzed Condensation of Imines and $\alpha$ -Diazo- $\beta$ -ketoesters.....  | S6  |
| Cu/Yb-Catalyzed Condensation of Imine with $\alpha$ -Diazo- $\beta$ -diketone..... | S30 |
| Application to Lamellarin Scaffolds.....                                           | S33 |
| References.....                                                                    | S35 |
| $^1\text{H}$ and $^{13}\text{C}$ NMR Spectra.....                                  | S37 |

## Materials and Methods

**General.** All reactions dealing with air- and moisture-sensitive compounds were carried out in oven dried reaction vessels under a nitrogen atmosphere. Analytical thin-layer chromatography (TLC) was performed on Merck 60 F254 silica gel plates.  $^1\text{H}$  and  $^{13}\text{C}$  nuclear magnetic resonance (NMR) spectra were recorded on Bruker 400 MHz NMR spectrometers.  $^1\text{H}$  and  $^{13}\text{C}$  NMR spectra are reported in parts per million (ppm) downfield from an internal standard, tetramethylsilane (0.00 ppm) and  $\text{CHCl}_3$  (77.26 ppm), respectively. Chemical shifts are reported in ppm and the multiplicities are reflected by s (singlet), d (doublet), q (quartet), sept (septet) and m (multiplet). Coupling constants are represented by  $J$  in hertz (Hz). Gas chromatographic (GC) analysis was performed on a Shimadzu GC-2010 system equipped with FID detector and a capillary column, DB-5 (Agilent J&W, 0.25 mm i.d. x 30 m, 0.25  $\mu\text{m}$  film thickness). High-resolution mass spectra (HRMS) were obtained with a Q-ToF Premier LC HR mass spectrometer. Melting points were determined using a capillary melting point apparatus and are uncorrected.

**Materials.** Unless otherwise noted, materials were purchased from Aldrich, Alfa Aesar, and other commercial suppliers and were used as received. Copper(II) trifluoroacetylacetonate and copper(II) hexafluoroacetylacetonate were purchased from Alfa Aesar and Strem Chemicals, respectively, and were used as received. Anhydrous toluene used was distilled over calcium hydride ( $\text{CaH}_2$ ) and stored under  $\text{N}_2$ .

## Preparation of Starting Materials

### Synthesis of Imines

All imines except for **1aa**, **1ab**, **1ac**, **1ag**, **1ah** were synthesized by condensation of the corresponding anilines and ketones according to the literature procedures,<sup>1</sup> and purified by recrystallization from EtOAc/hexane or distillation under reduced pressure. Below is the summarized characterization data for newly synthesized imine. <sup>1</sup>H and <sup>13</sup>C NMR spectral data for the rest of the imines showed good agreement with literature data.<sup>2</sup> Imines **1aa**, **1ab**, **1ac**, **1ad**, **1ag**, **1ah** were prepared according to the literature procedures.<sup>3,4</sup>

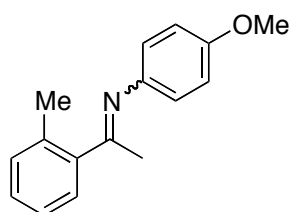

**4-Methoxy-N-(1-(*o*-tolyl)ethylidene)aniline (1j):** Red oil (68% yield, *E/Z* = 3:2); <sup>1</sup>H NMR (400 MHz, CDCl<sub>3</sub>, *E*-isomer): δ 7.37–7.35 (m, 1H), 7.26–7.22 (m, 2H), 7.06–6.99 (m, 1H), 6.91 (d, *J* = 8.9 Hz, 2H), 6.80 (d, *J* = 8.9 Hz, 2H), 3.80 (s, 3H), 2.48 (s, 3H), 2.16 (s, 3H); <sup>13</sup>C NMR (100 MHz, CDCl<sub>3</sub>, *E*-isomer): δ 170.3, 156.2, 144.5, 142.0, 135.0, 131.2, 128.7, 127.3, 125.95, 120.8, 114.5, 55.6, 21.3, 20.3; **HRMS** (ESI) Calcd for C<sub>16</sub>H<sub>18</sub>NO [M + H]<sup>+</sup> 240.1388, found 240.1383.

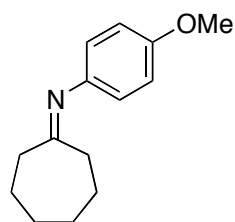

**N-Cycloheptylidene-4-methoxyaniline (1t):** Orange oil (66% yield); <sup>1</sup>H NMR (400 MHz, CDCl<sub>3</sub>) δ 6.84 (d, *J* = 8.8 Hz, 2H), 6.63 (d, *J* = 8.8 Hz, 2H), 3.77 (s, 3H), 2.63–2.60 (m, 2H), 2.39–2.23 (m, 2H), 1.78–1.74 (m, 2H), 1.67–1.54 (m, 6H); <sup>13</sup>C NMR (100 MHz, CDCl<sub>3</sub>) δ 178.5, 155.6, 144.7, 120.4, 114.3, 55.5, 40.7, 33.4, 30.3, 30.0, 26.9, 25.5; **HRMS** (ESI) Calcd for C<sub>14</sub>H<sub>20</sub>NO [M + H]<sup>+</sup> 218.1545, found 218.1544.

### Synthesis of Diazocarbonyl Compounds

**General Method.** To a 100 mL round bottom flask charged with ketoester (10 mmol) and 4-acetamidobenzenesulfonyl azide (2.64 g, 11 mmol) in acetonitrile (40 mL) was added

triethylamine (4.2 mL, 30 mmol) dropwise at 0 °C. Upon stirring at room temperature for 14 h, the reaction mixture was concentrated under reduced pressure. The residual solid was triturated with ether/light petroleum ether. The mixture was filtered through a pad of Celite, and the filtrate was concentrated under reduced pressure. Purification by flash chromatography afforded the corresponding diazocarbonyl compound.

Below are summarized characterization data for newly synthesized diazocarbonyl compounds.  $^1\text{H}$  and  $^{13}\text{C}$  NMR spectral data for the rest of the diazocarbonyl compound showed good agreement with literature data.<sup>5</sup>

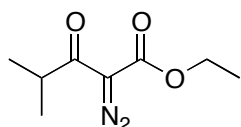

**Ethyl 2-diazo-4-methyl-3-oxopentanoate (2a):** Yellow oil (96% yield, eluent = hexane/EtOAc (90:10));  $^1\text{H}$  NMR (400 MHz,  $\text{CDCl}_3$ )  $\delta$  4.30 (q,  $J = 7.1$  Hz, 2H), 3.58 (sept,  $J = 6.8$  Hz, 1H), 1.34 (t,  $J = 7.1$  Hz, 3H), 1.13 (d,  $J = 6.8$  Hz, 6H);  $^{13}\text{C}$  NMR (100 MHz,  $\text{CDCl}_3$ )  $\delta$  197.2, 161.4, 61.5, 37.0, 18.7, 14.5; **HRMS** (ESI) Calcd for  $\text{C}_8\text{H}_{13}\text{N}_2\text{O}_3$   $[\text{M} + \text{H}]^+$  185.0926, found 185.0924.

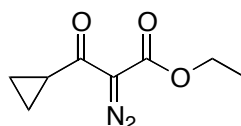

**Ethyl 3-cyclopropyl-2-diazo-3-oxopropanoate (2c):** Yellow oil (95% yield, eluent = hexane/EtOAc (90:10));  $^1\text{H}$  NMR (400 MHz,  $\text{CDCl}_3$ )  $\delta$  4.33 (q,  $J = 7.1$  Hz, 2H), 3.10 (tt,  $J = 7.9, 4.6$  Hz, 1H), 1.35 (t,  $J = 7.1$  Hz, 3H), 1.25–1.14 (m, 2H), 1.08–0.92 (m, 2H);  $^{13}\text{C}$  NMR (100 MHz,  $\text{CDCl}_3$ )  $\delta$  192.6, 162.0, 61.6, 17.9, 14.5, 12.0; **HRMS** (ESI) Calcd for  $\text{C}_8\text{H}_{11}\text{N}_2\text{O}_3$   $[\text{M} + \text{H}]^+$  183.0770, found 183.0772.

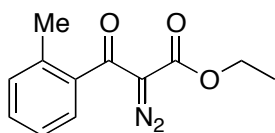

**Ethyl 2-diazo-3-oxo-3-(*o*-tolyl)propanoate (2j):** Yellow oil (64% yield, eluent = hexane/EtOAc (90:10));  $^1\text{H}$  NMR (400 MHz,  $\text{CDCl}_3$ ):  $\delta$  7.39–7.29 (m, 1H), 7.28–7.18 (m, 3H), 4.17 (q,  $J = 7.1$  Hz, 2H), 2.35 (s, 3H), 1.17 (t,  $J = 7.1$  Hz, 3H);  $^{13}\text{C}$  NMR (100 MHz,



CDCl<sub>3</sub>):  $\delta$  188.9, 160.6, 138.0, 135.1, 130.5, 130.3, 126.6, 125.3, 61.6, 19.2, 14.1; **HRMS** (ESI) Calcd for C<sub>12</sub>H<sub>13</sub>N<sub>2</sub>O<sub>3</sub> [M + H]<sup>+</sup> 233.0926, found 233.0921.

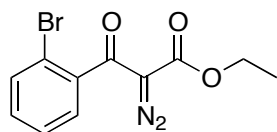

**Ethyl 3-(2-bromophenyl)-2-diazo-3-oxopropanoate (2k):** Yellow oil (72% yield, eluent = hexane/EtOAc (90:10)); **<sup>1</sup>H NMR** (400 MHz, CDCl<sub>3</sub>):  $\delta$  7.58 (dd,  $J$  = 7.9, 1.0 Hz, 1H), 7.39 (td,  $J$  = 7.5, 1.1 Hz, 1H), 7.32 (td,  $J$  = 7.7, 1.8 Hz, 1H), 7.27 (dd,  $J$  = 7.5, 1.7 Hz, 1H), 4.18 (q,  $J$  = 7.1 Hz, 2H), 1.16 (t,  $J$  = 7.1 Hz, 3H); **<sup>13</sup>C NMR** (100 MHz, CDCl<sub>3</sub>):  $\delta$  186.7, 160.32, 140.0, 132.5, 131.2, 127.8, 127.3, 119.0, 61.7, 14.0; **HRMS** (ESI) Calcd for C<sub>11</sub>H<sub>10</sub>BrN<sub>2</sub>O<sub>3</sub> [M + H]<sup>+</sup> 296.9875, found 296.9877.

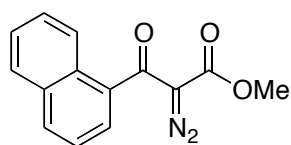

**Methyl 2-diazo-3-(naphthalen-1-yl)-3-oxopropanoate (2l):** Yellow oil (74% yield, eluent = hexane/EtOAc (90:10)); **<sup>1</sup>H NMR** (400 MHz, CDCl<sub>3</sub>):  $\delta$  8.06–7.98 (m, 1H), 7.92 (d,  $J$  = 8.0 Hz, 1H), 7.85 (dd,  $J$  = 6.7, 2.6 Hz, 1H), 7.57–7.38 (m, 4H), 3.63 (s, 3H); **<sup>13</sup>C NMR** (100 MHz, CDCl<sub>3</sub>):  $\delta$  187.7, 160.9, 135.2, 133.5, 131.3, 129.9, 128.6, 127.4, 126.4, 125.8, 124.5, 124.4, 52.4; **HRMS** (ESI) Calcd for C<sub>14</sub>H<sub>11</sub>N<sub>2</sub>O<sub>3</sub> [M + H]<sup>+</sup> 255.0770, found 255.0764.

### Cu-Catalyzed Condensation of Imines and $\alpha$ -Diazo- $\beta$ -ketoesters

**General Procedure:** A 10 mL Schlenk tube equipped with a stirrer bar was charged with imine (0.20 mmol), Cu(tfacac)<sub>2</sub> (7.4 mg, 0.020 mmol, 10 mol%), 4Å molecular sieves (300 mg), and diazocarbonyl compound (0.30 mmol), followed by the addition of toluene (0.5 mL). The resulting mixture was stirred at 110 °C for 12 h. Upon cooling to room temperature, the reaction mixture was diluted with ethyl acetate (5 mL), followed by filtration through a pad of silica gel with ethyl acetate (20 mL) as an eluent. The filtrate was concentrated under reduced pressure, and the residue was purified by flash chromatography on silica gel to afford the pyrrole product.

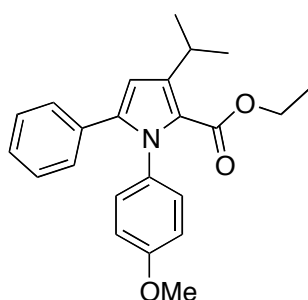

**Ethyl 3-isopropyl-1-(4-methoxyphenyl)-5-phenyl-1H-pyrrole-2-carboxylate (3aa):** The reaction was performed on a 5 mmol scale in a 100 mL 2-necked flask, following the same reaction stoichiometry and conditions as that of the general procedure. Yellow solid (92% yield, eluent = hexane/EtOAc (95:5)); The regiochemistry was confirmed by 2D NMR (HMQC and HMBC) analysis (see the attached spectra); Mp = 108–109 °C; <sup>1</sup>H NMR (400 MHz, CDCl<sub>3</sub>)  $\delta$  7.16–7.14 (m, 3H), 7.11–7.06 (m, 4H), 6.83–6.78 (m, 2H), 6.35 (s, 1H), 4.11 (q,  $J$  = 7.1 Hz, 2H), 3.79 (s, 3H), 3.61 (sept,  $J$  = 6.8 Hz, 1H), 1.30 (d,  $J$  = 6.9 Hz, 6H), 1.12 (t,  $J$  = 7.1 Hz, 3H); <sup>13</sup>C NMR (100 MHz, CDCl<sub>3</sub>)  $\delta$  161.7, 159.0, 141.9, 140.1, 133.2, 132.7, 129.8, 129.1, 128.2, 127.3, 121.4, 113.6, 108.5, 59.7, 55.6, 26.4, 24.2, 14.3; HRMS (ESI) Calcd for C<sub>23</sub>H<sub>26</sub>NO<sub>3</sub> [M + H]<sup>+</sup> 364.1913, found 364.1908.

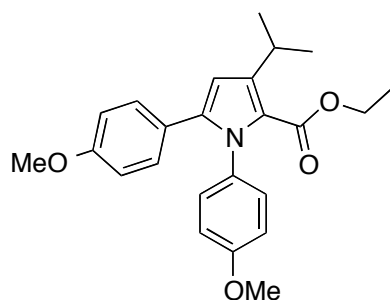

**Ethyl 3-isopropyl-1,5-bis(4-methoxyphenyl)-1H-pyrrole-2-carboxylate (3ba):** Brown solid (84% yield, eluent = hexane/EtOAc (95:5)); Mp = 95–97 °C; <sup>1</sup>H NMR (400 MHz, CDCl<sub>3</sub>): δ 7.12–7.04 (m, 2H), 7.04–6.99 (m, 2H), 6.85–6.78 (m, 2H), 6.73–6.66 (m, 2H), 6.29 (s, 1H), 4.10 (q, *J* = 7.1 Hz, 2H), 3.80 (s, 3H), 3.74 (s, 3H), 3.61 (sept, *J* = 6.8 Hz, 1H), 1.29 (d, *J* = 6.9 Hz, 6H), 1.12 (t, *J* = 7.1 Hz, 3H); <sup>13</sup>C NMR (100 MHz, CDCl<sub>3</sub>): δ 161.7, 158.9, 141.9, 140.1, 133.4, 130.4, 129.9, 125.2, 121.0, 113.7, 113.6, 107.9, 59.7, 55.6, 55.4, 26.4, 24.2, 14.3; **HRMS** (ESI) Calcd for C<sub>24</sub>H<sub>28</sub>NO<sub>4</sub> [M + H]<sup>+</sup> 394.2018, found 394.2015.

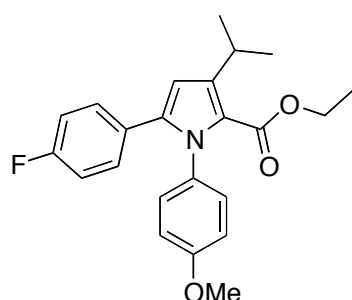

**Ethyl 5-(4-fluorophenyl)-3-isopropyl-1-(4-methoxyphenyl)-1H-pyrrole-2-carboxylate (3ca):** Yellow solid (85% yield, eluent = hexane/EtOAc (95:5)); Mp = 117–118 °C; <sup>1</sup>H NMR (400 MHz, CDCl<sub>3</sub>): δ 7.12–6.99 (m, 4H), 6.95–6.76 (m, 4H), 6.31 (s, 1H), 4.11 (q, *J* = 7.1 Hz, 2H), 3.79 (s, 3H), 3.61 (sept, *J* = 6.9 Hz, 1H), 1.29 (d, *J* = 6.9 Hz, 6H), 1.12 (t, *J* = 7.1 Hz, 3H); <sup>13</sup>C NMR (100 MHz, CDCl<sub>3</sub>): δ 162.1 (d, *J*<sub>C-F</sub> = 245.8 Hz), 161.6, 159.0, 141.8, 139.1, 133.0, 130.8 (d, *J*<sub>C-F</sub> = 8.0 Hz), 129.8, 128.8 (d, *J*<sub>C-F</sub> = 3.4 Hz), 121.4, 115.2 (d, *J*<sub>C-F</sub> = 21.5 Hz), 113.7, 108.4, 59.8, 55.6, 26.3, 24.1, 14.3; **HRMS** (ESI) Calcd for C<sub>23</sub>H<sub>25</sub>FNO<sub>3</sub> [M + H]<sup>+</sup> 382.1818, found 382.1815.

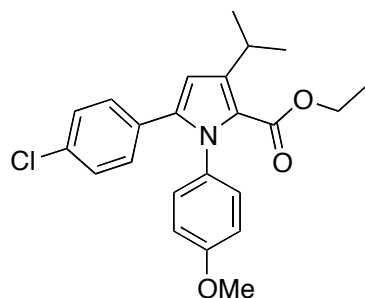

**Ethyl 5-(4-chlorophenyl)-3-isopropyl-1-(4-methoxyphenyl)-1H-pyrrole-2-carboxylate (3da):** Yellow solid (80% yield, eluent = hexane/EtOAc (95:5)); Mp = 119–120 °C; <sup>1</sup>H NMR (400 MHz, CDCl<sub>3</sub>) δ 7.13 (d, *J* = 8.6 Hz, 2H), 7.07 (d, *J* = 8.8 Hz, 2H), 7.01 (d, *J* = 8.5 Hz, 2H), 6.82 (d, *J* = 8.8 Hz, 2H), 6.34 (s, 1H), 4.11 (q, *J* = 7.1 Hz, 2H), 3.80 (s, 3H), 3.60 (sept, *J* = 6.9 Hz, 1H), 1.29 (d, *J* = 6.9 Hz, 6H), 1.12 (t, *J* = 7.1 Hz, 3H); <sup>13</sup>C NMR (100 MHz,

CDCl<sub>3</sub>)  $\delta$  161.6, 159.1, 141.8, 138.8, 133.3, 132.9, 131.1, 130.3, 129.8, 128.4, 121.8, 113.7, 108.6, 59.8, 55.6, 26.3, 24.2, 14.3; **HRMS** (ESI) Calcd for C<sub>23</sub>H<sub>25</sub>ClNO<sub>3</sub> [M + H]<sup>+</sup> 398.1523, found 398.1526.

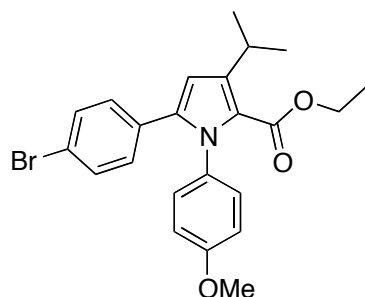

**Ethyl 5-(4-bromophenyl)-3-isopropyl-1-(4-methoxyphenyl)-1H-pyrrole-2-carboxylate (3ea):** Yellow solid (72% yield, eluent = hexane/EtOAc (95:5)); Mp = 115–117 °C; **<sup>1</sup>H NMR** (400 MHz, CDCl<sub>3</sub>):  $\delta$  7.28 (d,  $J$  = 8.5 Hz, 2H), 7.06 (d,  $J$  = 8.8 Hz, 2H), 6.95 (d,  $J$  = 8.5 Hz, 2H), 6.82 (d,  $J$  = 8.8 Hz, 2H), 6.34 (s, 1H), 4.10 (q,  $J$  = 7.1 Hz, 2H), 3.80 (s, 3H), 3.60 (sept,  $J$  = 6.8 Hz, 1H), 1.29 (d,  $J$  = 6.9 Hz, 6H), 1.12 (t,  $J$  = 7.1 Hz, 3H); **<sup>13</sup>C NMR** (100 MHz, CDCl<sub>3</sub>):  $\delta$  161.6, 159.1, 141.8, 138.7, 132.9, 131.6, 131.4, 130.5, 129.8, 121.8, 121.5, 113.7, 108.6, 59.8, 55.6, 26.3, 24.1, 14.3; **HRMS** (ESI) Calcd for C<sub>23</sub>H<sub>25</sub>BrNO<sub>3</sub> [M + H]<sup>+</sup> 442.1018, found 442.1023.

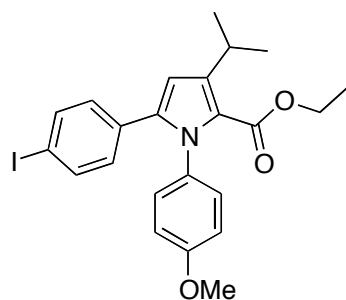

**Ethyl 5-(4-iodophenyl)-3-isopropyl-1-(4-methoxyphenyl)-1H-pyrrole-2-carboxylate (3fa):** Yellow solid (71% yield, eluent = hexane/EtOAc (95:5)); Mp = 103–104 °C; **<sup>1</sup>H NMR** (400 MHz, CDCl<sub>3</sub>)  $\delta$  7.48 (d,  $J$  = 8.0 Hz, 2H), 7.07 (d,  $J$  = 8.3 Hz, 2H), 6.83–6.81 (m, 4H), 6.34 (s, 1H), 4.10 (q,  $J$  = 7.1 Hz, 2H), 3.81 (s, 3H), 3.59 (sept,  $J$  = 6.5 Hz, 1H), 1.29 (d,  $J$  = 6.8 Hz, 6H), 1.12 (t,  $J$  = 7.1 Hz, 3H); **<sup>13</sup>C NMR** (100 MHz, CDCl<sub>3</sub>):  $\delta$  161.6, 159.1, 141.8, 138.8, 137.3, 132.9, 132.2, 130.7, 129.8, 121.9, 113.8, 108.6, 93.2, 59.9, 55.6, 26.3, 24.2, 14.3; **HRMS** (ESI) Calcd for C<sub>23</sub>H<sub>25</sub>INO<sub>3</sub> [M + H]<sup>+</sup> 490.0879, found 490.0877.

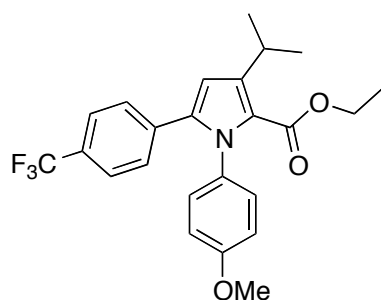

**Ethyl 3-isopropyl-1-(4-methoxyphenyl)-5-(4-(trifluoromethyl)phenyl)-1H-pyrrole-2-carboxylate (3ga):** Yellow solid (72% yield, eluent = hexane/EtOAc (97:3)); Mp = 94–95 °C;  $^1\text{H NMR}$  (400 MHz,  $\text{CDCl}_3$ ):  $\delta$  7.41 (d,  $J = 8.3$  Hz, 2H), 7.19 (d,  $J = 8.2$  Hz, 2H), 7.08 (d,  $J = 8.8$  Hz, 2H), 6.83 (d,  $J = 8.8$  Hz, 2H), 6.41 (s, 1H), 4.12 (q,  $J = 7.1$  Hz, 2H), 3.82 (s, 3H), 3.60 (sept,  $J = 6.8$  Hz, 1H), 1.30 (d,  $J = 6.9$  Hz, 6H), 1.13 (t,  $J = 7.1$  Hz, 3H);  $^{13}\text{C NMR}$  (100 MHz,  $\text{CDCl}_3$ ):  $\delta$  161.6, 159.2, 141.8, 138.2, 136.2, 132.7, 129.8, 129.02, 129.02 (q,  $J_{\text{C-F}} = 33.0$  Hz), 125.1 (q,  $J_{\text{C-F}} = 4.0$  Hz), 124.3 (q,  $J_{\text{C-F}} = 270.0$  Hz), 122.4, 113.8, 109.3, 60.0, 55.6, 26.3, 24.1, 14.3; **HRMS** (ESI) Calcd for  $\text{C}_{24}\text{H}_{25}\text{F}_3\text{NO}_3$   $[\text{M} + \text{H}]^+$  432.1787, found 432.1782.

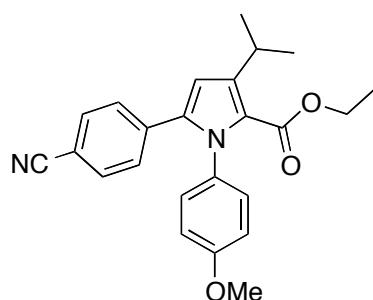

**Ethyl 5-(4-cyanophenyl)-3-isopropyl-1-(4-methoxyphenyl)-1H-pyrrole-2-carboxylate (3ha):** White solid (74% yield, eluent = hexane/EtOAc (90:10)); Mp = 121–123 °C;  $^1\text{H NMR}$  (400 MHz,  $\text{CDCl}_3$ ):  $\delta$  7.44 (d,  $J = 8.4$  Hz, 2H), 7.17 (d,  $J = 8.4$  Hz, 2H), 7.08 (d,  $J = 8.8$  Hz, 2H), 6.84 (d,  $J = 8.8$  Hz, 2H), 6.45 (s, 1H), 4.12 (q,  $J = 7.1$  Hz, 2H), 3.82 (s, 3H), 3.59 (sept,  $J = 6.8$  Hz, 1H), 1.30 (d,  $J = 6.9$  Hz, 6H), 1.13 (t,  $J = 7.1$  Hz, 3H);  $^{13}\text{C NMR}$  (100 MHz,  $\text{CDCl}_3$ ):  $\delta$  161.5, 159.4, 141.7, 137.6, 137.1, 132.5, 132.0, 129.7, 129.1, 122.9, 119.0, 113.9, 110.5, 109.8, 60.1, 55.6, 26.3, 24.1, 14.2; **HRMS** (ESI) Calcd for  $\text{C}_{24}\text{H}_{25}\text{N}_2\text{O}_3$   $[\text{M} + \text{H}]^+$  389.1865, found 389.1861.

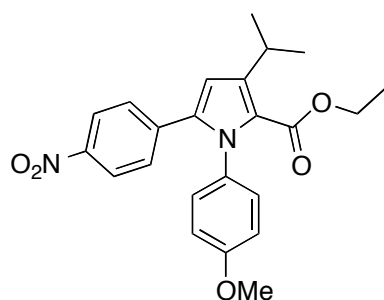

**Ethyl 3-isopropyl-1-(4-methoxyphenyl)-5-(4-nitrophenyl)-1H-pyrrole-2-carboxylate (3ia):** Orange solid (52% yield, eluent = hexane/EtOAc (95:5)); Mp = 106–107 °C;  $^1\text{H NMR}$  (400 MHz,  $\text{CDCl}_3$ ):  $\delta$  8.02 (d,  $J = 8.8$  Hz, 2H), 7.23 (d,  $J = 8.8$  Hz, 2H), 7.09 (d,  $J = 8.8$  Hz, 2H), 6.85 (d,  $J = 8.8$  Hz, 2H), 6.50 (s, 1H), 4.13 (q,  $J = 7.1$  Hz, 2H), 3.82 (s, 3H), 3.60 (sept,  $J = 6.8$  Hz, 1H), 1.30 (d,  $J = 6.8$  Hz, 6H), 1.14 (t,  $J = 7.1$  Hz, 3H);  $^{13}\text{C NMR}$  (100 MHz,  $\text{CDCl}_3$ ):  $\delta$  161.5, 159.5, 146.5, 141.8, 139.1, 137.2, 132.5, 129.8, 129.1, 123.6, 123.3, 114.0, 110.2, 60.2, 55.7, 26.3, 24.1, 14.3; **HRMS** (ESI) Calcd for  $\text{C}_{23}\text{H}_{25}\text{N}_2\text{O}_5$   $[\text{M} + \text{H}]^+$  409.1763, found 409.1767.

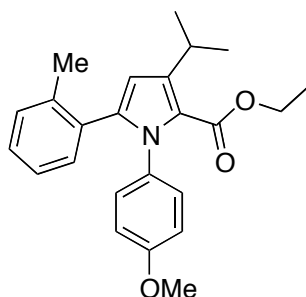

**Ethyl 3-isopropyl-1-(4-methoxyphenyl)-5-(*o*-tolyl)-1H-pyrrole-2-carboxylate (3ja):** Orange solid (88% yield, eluent = hexane/EtOAc (95:5)); Mp = 98–99 °C;  $^1\text{H NMR}$  (400 MHz,  $\text{CDCl}_3$ ):  $\delta$  7.15–7.03 (m, 2H), 7.03–6.87 (m, 4H), 6.69 (d,  $J = 8.8$  Hz, 2H), 6.17 (s, 1H), 4.11 (q,  $J = 7.1$  Hz, 2H), 3.72 (s, 3H), 3.63 (sept,  $J = 6.8$  Hz, 1H), 2.09 (s, 3H), 1.29 (d,  $J = 6.9$  Hz, 6H), 1.11 (t,  $J = 7.1$  Hz, 3H);  $^{13}\text{C NMR}$  (100 MHz,  $\text{CDCl}_3$ ):  $\delta$  161.8, 158.5, 141.7, 139.6, 137.9, 133.1, 132.6, 131.7, 129.9, 129.1, 128.2, 125.1, 120.0, 113.3, 108.8, 59.7, 55.5, 26.4, 24.2, 20.6, 14.3; **HRMS** (ESI) Calcd for  $\text{C}_{24}\text{H}_{28}\text{NO}_3$   $[\text{M} + \text{H}]^+$  378.2069, found 378.2072. Recrystallization from EtOAc/hexane afforded single crystals suitable for X-ray diffraction analysis, which unambiguously confirmed the substitution pattern of **3ja** (see below).<sup>6</sup>

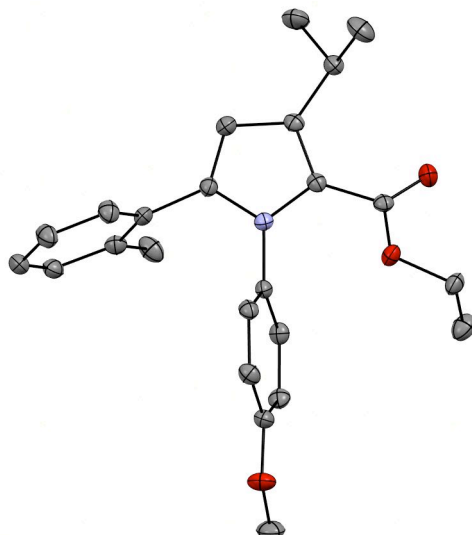

**Figure S1.** ORTEP diagram of **3ja**. Thermal ellipsoids drawn at 50% probability.

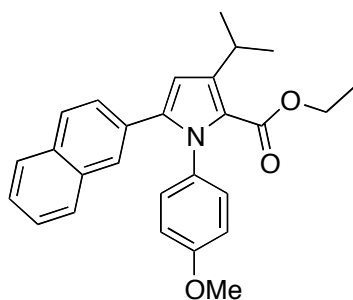

**Ethyl 3-isopropyl-1-(4-methoxyphenyl)-5-(naphthalen-2-yl)-1H-pyrrole-2-carboxylate (3ka):** Yellow solid (87% yield, eluent = hexane/EtOAc (95:5)); Mp = 130–132 °C; <sup>1</sup>H NMR (400 MHz, CDCl<sub>3</sub>): δ 7.73–7.70 (m, 1H), 7.68–7.64 (m, 1H), 7.64–7.54 (m, 2H), 7.44–7.34 (m, 2H), 7.17–7.09 (m, 3H), 6.80 (d, *J* = 8.8 Hz, 2H), 6.47 (s, 1H), 4.12 (q, *J* = 7.1 Hz, 2H), 3.77 (s, 3H), 3.64 (sept, *J* = 6.8 Hz, 1H), 1.33 (d, *J* = 6.9 Hz, 6H), 1.13 (t, *J* = 7.1 Hz, 3H); <sup>13</sup>C NMR (100 MHz, CDCl<sub>3</sub>): δ 161.7, 159.0, 142.0, 140.0, 133.3, 133.2, 132.4, 130.2, 129.9, 128.3, 128.2, 127.7, 127.6, 126.9, 126.34, 126.28, 121.6, 113.7, 108.9, 59.8, 55.6, 26.4, 24.2, 14.3; **HRMS** (ESI) Calcd for C<sub>27</sub>H<sub>28</sub>NO<sub>3</sub> [M + H]<sup>+</sup> 414.2069, found 414.2072.

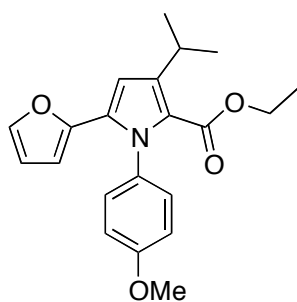

**Ethyl 5-(furan-2-yl)-3-isopropyl-1-(4-methoxyphenyl)-1H-pyrrole-2-carboxylate (3la):** Yellow solid (83% yield, eluent = hexane/EtOAc (95:5)); Mp = 80–82 °C; <sup>1</sup>H NMR (400 MHz, CDCl<sub>3</sub>): δ 7.30 (d, *J* = 1.3 Hz, 1H), 7.19 (d, *J* = 8.8 Hz, 2H), 6.95 (d, *J* = 8.8 Hz, 2H), 6.61 (s, 1H), 6.16 (dd, *J* = 3.4, 1.8 Hz, 1H), 5.13 (d, *J* = 3.4 Hz, 1H), 4.09 (q, *J* = 7.1 Hz, 2H), 3.87 (s, 3H), 3.60 (sept, *J* = 6.8 Hz, 1H), 1.29 (d, *J* = 6.9 Hz, 6H), 1.10 (t, *J* = 7.1 Hz, 3H); <sup>13</sup>C NMR (100 MHz, CDCl<sub>3</sub>): δ 161.5, 159.7, 147.0, 142.0, 141.6, 133.5, 131.4, 129.6, 121.5, 114.1, 111.4, 106.6, 106.4, 59.7, 55.7, 26.3, 24.1, 14.2; **HRMS** (ESI) Calcd for C<sub>21</sub>H<sub>24</sub>NO<sub>4</sub> [M + H]<sup>+</sup> 354.1705, found 354.1706.

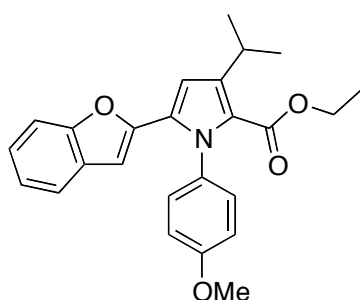

**Ethyl 5-(benzofuran-2-yl)-3-isopropyl-1-(4-methoxyphenyl)-1H-pyrrole-2-carboxylate (3ma):** Yellow solid (87% yield, eluent = hexane/EtOAc (95:5)); Mp = 85–86 °C; <sup>1</sup>H NMR (400 MHz, CDCl<sub>3</sub>): δ 7.41 (d, *J* = 8.2 Hz, 1H), 7.32 (d, *J* = 7.5 Hz, 1H), 7.27–7.23 (m, 2H), 7.23–7.17 (m, 1H), 7.11 (t, *J* = 7.4 Hz, 1H), 7.00 (d, *J* = 8.8 Hz, 2H), 6.86 (s, 1H), 5.43 (s, 1H), 4.11 (q, *J* = 7.1 Hz, 2H), 3.90 (s, 3H), 3.62 (sept, *J* = 6.8 Hz, 1H), 1.33 (d, *J* = 6.9 Hz, 6H), 1.12 (t, *J* = 7.1 Hz, 3H); <sup>13</sup>C NMR (100 MHz, CDCl<sub>3</sub>): δ 161.4, 159.9, 154.1, 148.6, 141.9, 133.2, 130.6, 129.7, 129.0, 124.6, 123.1, 122.9, 121.2, 114.3, 110.9, 108.4, 102.5, 59.9, 55.7, 26.4, 24.1, 14.2; **HRMS** (ESI) Calcd for C<sub>25</sub>H<sub>26</sub>NO<sub>4</sub> [M + H]<sup>+</sup> 404.1862, found 404.1862.

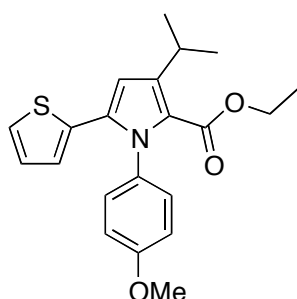

**Ethyl 3-isopropyl-1-(4-methoxyphenyl)-5-(thiophen-2-yl)-1H-pyrrole-2-carboxylate (3na):** Yellow solid (73% yield, eluent = hexane/EtOAc (95:5)); Mp = 73–75 °C; <sup>1</sup>H NMR (400 MHz, CDCl<sub>3</sub>): δ 7.18 (d, *J* = 8.8 Hz, 2H), 7.08 (d, *J* = 5.1 Hz, 1H), 6.91 (d, *J* = 8.8 Hz,



2H), 6.84–6.80 (m, 1H), 6.65 (d,  $J = 3.7$  Hz, 1H), 6.46 (s, 1H), 4.09 (q,  $J = 7.1$  Hz, 2H), 3.85 (s, 3H), 3.60 (sept,  $J = 6.9$  Hz, 1H), 1.29 (d,  $J = 6.9$  Hz, 6H), 1.11 (t,  $J = 7.1$  Hz, 3H);  $^{13}\text{C}$  NMR (100 MHz,  $\text{CDCl}_3$ ):  $\delta$  161.4, 159.8, 142.0, 134.4, 134.0, 132.9, 130.3, 127.1, 125.7, 125.4, 121.7, 114.0, 107.9, 59.7, 55.7, 26.3, 24.1, 14.3; HRMS (ESI) Calcd for  $\text{C}_{21}\text{H}_{24}\text{NO}_3\text{S}$   $[\text{M} + \text{H}]^+$  370.1477, found 370.1476.

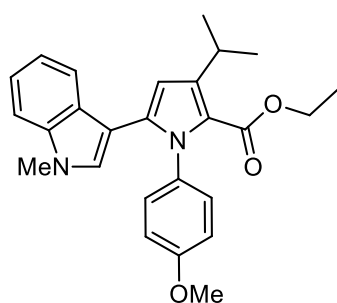

**Ethyl 3-isopropyl-1-(4-methoxyphenyl)-5-(1-methyl-1H-indol-3-yl)-1H-pyrrole-2-carboxylate (30a):** Yellow solid (70% yield, eluent = hexane/EtOAc (95:5)); Mp = 134–135 °C;  $^1\text{H}$  NMR (400 MHz,  $\text{CDCl}_3$ ):  $\delta$  7.83 (d,  $J = 7.9$  Hz, 1H), 7.23 (dd,  $J = 3.4, 1.0$  Hz, 2H), 7.21–7.04 (m, 3H), 6.85 (d,  $J = 8.9$  Hz, 2H), 6.55 (s, 1H), 6.15 (s, 1H), 4.11 (q,  $J = 7.1$  Hz, 2H), 3.81 (s, 3H), 3.67 (sept,  $J = 6.8$  Hz, 1H), 3.56 (s, 3H), 1.35 (d,  $J = 6.9$  Hz, 6H), 1.12 (t,  $J = 7.1$  Hz, 3H);  $^{13}\text{C}$  NMR (100 MHz,  $\text{CDCl}_3$ ):  $\delta$  161.7, 159.1, 142.4, 136.5, 134.7, 134.0, 129.9, 127.8, 127.5, 122.3, 120.4, 120.2, 120.0, 113.7, 109.5, 107.6, 107.0, 59.5, 55.6, 33.0, 26.5, 24.2, 14.3; HRMS (ESI) Calcd for  $\text{C}_{26}\text{H}_{29}\text{N}_2\text{O}_3$   $[\text{M} + \text{H}]^+$  417.2178, found 417.2177.

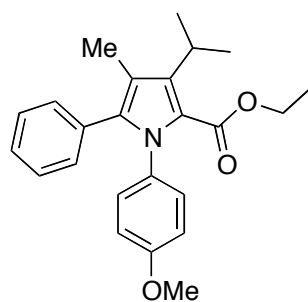

**Ethyl 3-isopropyl-1-(4-methoxyphenyl)-4-methyl-5-phenyl-1H-pyrrole-2-carboxylate (3pa):** Orange solid (77% yield, eluent = hexane/EtOAc (95:5)); Mp = 88–89 °C;  $^1\text{H}$  NMR (400 MHz,  $\text{CDCl}_3$ ):  $\delta$  7.22–7.14 (m, 3H), 7.03 (dd,  $J = 7.6, 1.9$  Hz, 2H), 6.95 (d,  $J = 8.9$  Hz, 2H), 6.70 (d,  $J = 8.9$  Hz, 2H), 4.03 (q,  $J = 7.1$  Hz, 2H), 3.76 (sept,  $J = 6.8$  Hz, 1H) 3.74 (s, 3H), 2.07 (s, 3H), 1.38 (d,  $J = 7.2$  Hz, 6H), 0.99 (t,  $J = 7.1$  Hz, 3H);  $^{13}\text{C}$  NMR (100 MHz,  $\text{CDCl}_3$ ):  $\delta$  162.3, 158.5, 138.2, 137.7, 133.6, 132.2, 131.2, 129.5, 127.9, 127.3, 121.0, 116.9,

113.3, 59.8, 55.5, 26.1, 22.2, 14.1, 11.8; **HRMS** (ESI) Calcd for  $C_{24}H_{28}NO_3$   $[M + H]^+$  378.2069, found 378.2069.

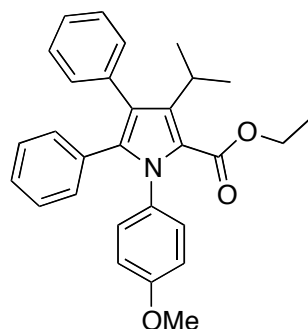

**Ethyl 3-isopropyl-1-(4-methoxyphenyl)-4,5-diphenyl-1H-pyrrole-2-carboxylate (3qa):** Brown solid (76% yield, eluent = hexane/EtOAc (95:5)); Mp = 126–128 °C;  **$^1H$  NMR** (400 MHz,  $CDCl_3$ ):  $\delta$  7.25–7.13 (m, 5H), 7.07 (d,  $J$  = 8.8 Hz, 2H), 6.97 (d,  $J$  = 6.9 Hz, 3H), 6.87 (dd,  $J$  = 7.4, 1.8 Hz, 2H), 6.73 (d,  $J$  = 8.8 Hz, 2H), 4.08 (q,  $J$  = 7.1 Hz, 2H), 3.74 (s, 3H), 3.43 (sept,  $J$  = 7.1 Hz, 1H), 1.26 (d,  $J$  = 7.1 Hz, 6H), 1.06 (t,  $J$  = 7.1 Hz, 3H);  **$^{13}C$  NMR** (100 MHz,  $CDCl_3$ ):  $\delta$  162.3, 158.7, 137.6, 137.5, 136.4, 133.2, 131.78, 131.76, 131.3, 129.8, 127.8, 127.5, 127.0, 126.5, 125.0, 121.6, 113.4, 60.1, 55.5, 26.5, 22.9, 14.2; **HRMS** (ESI) Calcd for  $C_{29}H_{30}NO_3$   $[M + H]^+$  440.2226, found 440.2221.

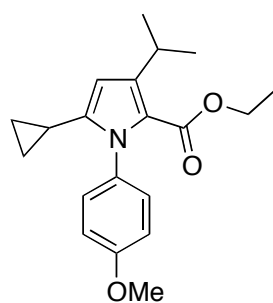

**Ethyl 5-cyclopropyl-3-isopropyl-1-(4-methoxyphenyl)-1H-pyrrole-2-carboxylate (3ra):** Yellow solid (84% yield, eluent = hexane/EtOAc (95:5)); Mp = 72–73 °C;  **$^1H$  NMR** (400 MHz,  $CDCl_3$ ):  $\delta$  7.18 (d,  $J$  = 8.8 Hz, 2H), 6.93 (d,  $J$  = 8.8 Hz, 2H), 5.75 (s, 1H), 4.05 (q,  $J$  = 7.1 Hz, 2H), 3.84 (s, 3H), 3.56 (sept,  $J$  = 6.8 Hz, 1H), 1.40 – 1.31 (m, 1H), 1.22 (d,  $J$  = 6.9 Hz, 6H), 1.07 (t,  $J$  = 7.1 Hz, 3H), 0.76 – 0.66 (m, 2H), 0.66 – 0.55 (m, 2H);  **$^{13}C$  NMR** (100 MHz,  $CDCl_3$ ):  $\delta$  161.4, 159.0, 143.3, 141.9, 133.5, 129.2, 119.7, 113.8, 102.3, 59.3, 55.6, 26.3, 24.1, 14.2, 8.3, 8.0; **HRMS** (ESI) Calcd for  $C_{20}H_{26}NO_3$   $[M + H]^+$  328.1913, found 328.1909.

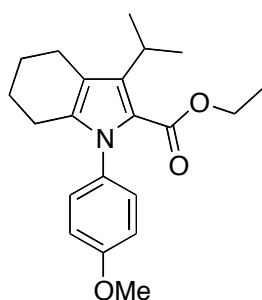

**Ethyl 3-isopropyl-1-(4-methoxyphenyl)-4,5,6,7-tetrahydro-1H-indole-2-carboxylate (3sa):** Yellow oil (73% yield, eluent = hexane/EtOAc (95:5));  $^1\text{H NMR}$  (400 MHz,  $\text{CDCl}_3$ ):  $\delta$  7.08 (d,  $J = 8.8$  Hz, 2H), 6.89 (d,  $J = 8.8$  Hz, 2H), 4.00 (q,  $J = 7.1$  Hz, 2H), 3.83 (s, 3H), 3.79 (sept,  $J = 6.8$  Hz, 1H), 2.64 (t,  $J = 5.4$  Hz, 2H), 2.23 (t,  $J = 5.6$  Hz, 2H), 1.74–1.69 (m, 4H), 1.30 (d,  $J = 7.1$  Hz, 6H), 0.97 (t,  $J = 7.1$  Hz, 3H);  $^{13}\text{C NMR}$  (100 MHz,  $\text{CDCl}_3$ ):  $\delta$  162.0, 158.8, 137.7, 136.5, 133.5, 128.7, 119.3, 117.5, 113.8, 59.3, 55.6, 26.1, 23.8, 23.7, 23.4, 22.9, 22.4, 14.1; **HRMS** (ESI) Calcd for  $\text{C}_{21}\text{H}_{28}\text{NO}_3$   $[\text{M} + \text{H}]^+$  342.2069, found 342.2068.

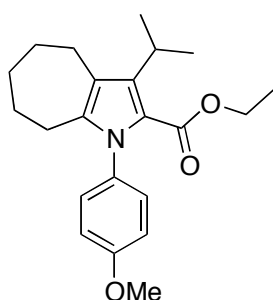

**Ethyl 3-isopropyl-1-(4-methoxyphenyl)-1,4,5,6,7,8-hexahydrocyclohepta[b]pyrrole-2-carboxylate (3ta):** Yellow solid (68% yield, eluent = hexane/EtOAc (95:5)); Mp = 85–87 °C;  $^1\text{H NMR}$  (400 MHz,  $\text{CDCl}_3$ ):  $\delta$  7.06 (d,  $J = 8.7$  Hz, 2H), 6.89 (d,  $J = 8.7$  Hz, 2H), 3.97 (q,  $J = 7.1$  Hz, 2H), 3.83 (s, 3H), 3.82 (sept,  $J = 7.1$  Hz, 1H), 2.71–2.68 (m, 2H), 2.40–2.25 (m, 2H), 1.80–1.76 (m, 2H), 1.71–1.60 (m, 2H), 1.53–1.57 (m, 2H), 1.32 (d,  $J = 7.2$  Hz, 6H), 0.95 (t,  $J = 7.1$  Hz, 3H);  $^{13}\text{C NMR}$  (100 MHz,  $\text{CDCl}_3$ ):  $\delta$  161.9, 158.7, 140.8, 137.4, 133.5, 129.1, 122.7, 118.3, 113.5, 59.1, 55.4, 32.3, 28.2, 26.9, 26.5, 26.2, 25.1, 22.5, 13.9; **HRMS** (ESI) Calcd for  $\text{C}_{22}\text{H}_{30}\text{NO}_3$   $[\text{M} + \text{H}]^+$  356.2226, found 356.2227.

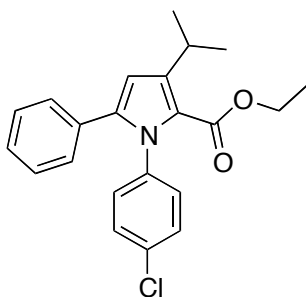

**Ethyl 1-(4-chlorophenyl)-3-isopropyl-5-phenyl-1H-pyrrole-2-carboxylate (3ua):** Orange solid (42% yield, eluent = hexane/EtOAc (95:5)); Mp = 90–91 °C;  $^1\text{H NMR}$  (400 MHz,  $\text{CDCl}_3$ ):  $\delta$  7.29–7.23 (m, 2H), 7.19–7.17 (m, 3H), 7.12–7.03 (m, 4H), 6.36 (s, 1H), 4.11 (q,  $J = 7.1$  Hz, 2H), 3.61 (sept,  $J = 6.8$  Hz, 1H), 1.30 (d,  $J = 6.9$  Hz, 6H), 1.13 (t,  $J = 7.1$  Hz, 3H);  $^{13}\text{C NMR}$  (100 MHz,  $\text{CDCl}_3$ ):  $\delta$  161.3, 142.2, 139.9, 138.8, 133.4, 132.0, 130.0, 129.0, 128.4, 128.1, 127.4, 121.0, 108.8, 59.7, 26.1, 23.9, 14.0; **HRMS** (ESI) Calcd for  $\text{C}_{22}\text{H}_{23}\text{ClNO}_2$  [ $\text{M} + \text{H}$ ] $^+$  368.1417, found 368.1417.

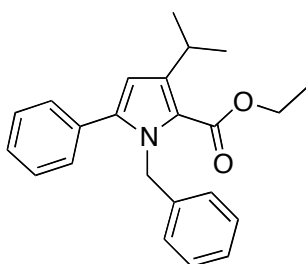

**Ethyl 1-benzyl-3-isopropyl-5-phenyl-1H-pyrrole-2-carboxylate (3va):** Yellow oil (72% yield, eluent = hexane/EtOAc (97:3));  $^1\text{H NMR}$  (400 MHz,  $\text{CDCl}_3$ ):  $\delta$  7.31 (s, 5H), 7.26–7.20 (m, 2H), 7.16 (t,  $J = 7.2$  Hz, 1H), 6.84 (d,  $J = 7.2$  Hz, 2H), 6.25 (s, 1H), 5.53 (s, 2H), 4.17 (q,  $J = 7.1$  Hz, 2H), 3.60 (sept,  $J = 6.8$  Hz, 1H), 1.26 (d,  $J = 6.8$  Hz, 6H), 1.21 (t,  $J = 7.1$  Hz, 3H);  $^{13}\text{C NMR}$  (100 MHz,  $\text{CDCl}_3$ ):  $\delta$  162.0, 142.7, 141.2, 140.3, 132.8, 129.6, 128.64, 128.60, 128.3, 126.8, 125.8, 119.4, 108.5, 59.8, 50.0, 26.6, 24.2, 14.4; **HRMS** (ESI) Calcd for  $\text{C}_{23}\text{H}_{26}\text{NO}_2$  [ $\text{M} + \text{H}$ ] $^+$  348.1964, found 348.1961.

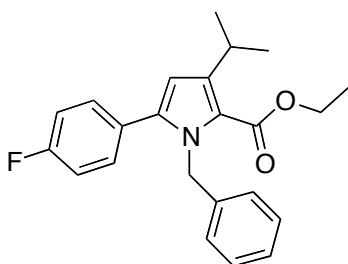

**Ethyl 1-benzyl-5-(4-fluorophenyl)-3-isopropyl-1*H*-pyrrole-2-carboxylate (3wa):** Yellow oil (68% yield, eluent = hexane/EtOAc (97:3)); <sup>1</sup>H NMR (400 MHz, CDCl<sub>3</sub>): δ 7.72–7.15 (m, 5H), 7.00 (t, *J* = 8.6 Hz, 2H), 6.82 (d, *J* = 7.4 Hz, 2H), 6.21 (s, 1H), 5.49 (s, 2H), 4.18 (q, *J* = 7.1 Hz, 2H), 3.60 (sept, *J* = 6.8 Hz, 1H), 1.26 (d, *J* = 6.8 Hz, 6H), 1.22 (t, *J* = 7.1 Hz, 3H); <sup>13</sup>C NMR (100 MHz, CDCl<sub>3</sub>): δ 162.85 (d, *J*<sub>C-F</sub> = 248.1 Hz), 162.0, 142.5, 140.1, 140.0, 131.39 (d, *J*<sub>C-F</sub> = 8.2 Hz), 128.82 (d, *J*<sub>C-F</sub> = 3.3 Hz), 128.7, 126.9, 125.7, 119.5, 115.64 (d, *J*<sub>C-F</sub> = 21.5 Hz), 108.5, 59.9, 49.9, 26.5, 24.1, 14.4; **HRMS** (ESI) Calcd for C<sub>23</sub>H<sub>25</sub>FNO<sub>2</sub> [M + H]<sup>+</sup> 366.1869, found 366.1866.

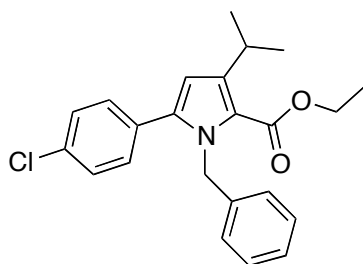

**Ethyl 1-benzyl-5-(4-chlorophenyl)-3-isopropyl-1*H*-pyrrole-2-carboxylate (3xa):** Yellow oil (72% yield, eluent = hexane/EtOAc (97:3)); <sup>1</sup>H NMR (400 MHz, CDCl<sub>3</sub>): δ 7.35 – 7.12 (m, 7H), 6.83 (d, *J* = 7.5 Hz, 2H), 6.23 (s, 1H), 5.50 (s, 2H), 4.18 (q, *J* = 7.1 Hz, 2H), 3.60 (sept, *J* = 6.7 Hz, 1H), 1.26 (d, *J* = 6.9 Hz, 6H), 1.22 (t, *J* = 7.1 Hz, 3H); <sup>13</sup>C NMR (100 MHz, CDCl<sub>3</sub>): δ 162.0, 142.6, 140.0, 139.8, 134.4, 131.2, 130.8, 128.9, 128.7, 127.0, 125.7, 119.8, 108.6, 59.9, 50.0, 26.5, 24.1, 14.4; **HRMS** (ESI) Calcd for C<sub>23</sub>H<sub>25</sub>ClNO<sub>2</sub> [M + H]<sup>+</sup> 382.1574, found 382.1569.

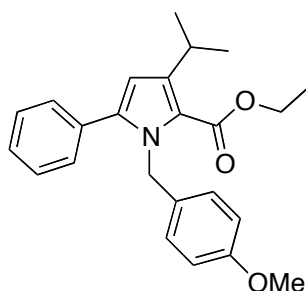

**Ethyl 3-isopropyl-1-(4-methoxybenzyl)-5-phenyl-1*H*-pyrrole-2-carboxylate (3ya):** Yellow oil (73% yield, eluent = hexane/EtOAc (97:3)); <sup>1</sup>H NMR (400 MHz, CDCl<sub>3</sub>): δ 7.32 (s, 5H), 6.76 (s, 4H), 6.22 (s, 1H), 5.47 (s, 2H), 4.20 (q, *J* = 7.1 Hz, 2H), 3.74 (s, 3H), 3.59 (sept, *J* = 6.8 Hz, 1H), 1.25 (d, *J* = 6.8 Hz, 6H), 1.25 (t, *J* = 7.1 Hz, 3H); <sup>13</sup>C NMR (100 MHz, CDCl<sub>3</sub>): δ 162.1, 158.5, 142.6, 141.1, 132.8, 132.3, 129.6, 128.6, 128.2, 127.1, 119.3,

114.0, 108.4, 59.8, 55.4, 49.3, 26.5, 24.2, 14.5; **HRMS** (ESI) Calcd for C<sub>24</sub>H<sub>28</sub>NO<sub>3</sub> [M + H]<sup>+</sup> 378.2069, found 378.2068.

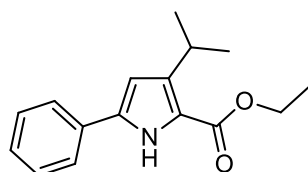

**Ethyl 3-isopropyl-5-phenyl-1H-pyrrole-2-carboxylate (3ya')**: The deprotection of the PMB group from **3za** was performed according to the literature procedure.<sup>7</sup> To a 50 mL oven dried Schlenk tube was added **3za** (56.6 mg, 0.15 mmol), anisole (152 mg, 1.35 mmol) and trifluoroacetic acid (1.5 mL) in dichloromethane (6.0 mL). The resulting mixture was stirred at 37 °C for 40 h. The reaction mixture was concentrated under reduced pressure, and the residue was purified by flash chromatography on silica gel to afford the desired N-H pyrrole. White solid (90% yield, eluent = hexane/EtOAc (90:10)); Mp = 104-106 °C; **<sup>1</sup>H NMR** (400 MHz, Acetone) δ 10.62 (s, 1H), 7.79 (d, *J* = 7.4 Hz, 2H), 7.39 (t, *J* = 7.7 Hz, 2H), 7.28 (d, *J* = 7.4 Hz, 1H), 6.63 (d, *J* = 2.8 Hz, 1H), 4.28 (q, *J* = 7.1 Hz, 2H), 3.61 (sept, *J* = 6.9 Hz, 1H), 1.32 (t, *J* = 7.1 Hz, 3H), 1.25 (d, *J* = 6.9 Hz, 6H); **<sup>13</sup>C NMR** (100 MHz, Acetone) δ 160.7, 140.9, 135.4, 131.9, 128.7, 127.2, 124.9, 118.7, 105.7, 59.2, 25.4, 23.2, 13.9; **HRMS** (ESI) Calcd for C<sub>16</sub>H<sub>20</sub>NO<sub>2</sub> [M + H]<sup>+</sup> 258.1494, found 258.1498.

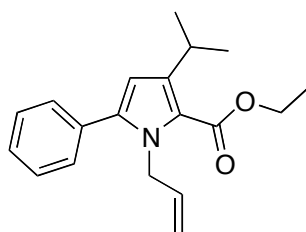

**Ethyl 1-allyl-3-isopropyl-5-phenyl-1H-pyrrole-2-carboxylate (3za)**: Yellow oil (57% yield, eluent = hexane/EtOAc (97:3)); **<sup>1</sup>H NMR** (400 MHz, CDCl<sub>3</sub>): δ 7.48–7.32 (m, 5H), 6.17 (s, 1H), 6.04–5.84 (m, 1H), 5.06 (dd, *J* = 10.4, 1.3 Hz, 1H), 4.92–4.87 (m, 2H), 4.76 (dd, *J* = 17.2, 1.3 Hz, 1H), 4.31 (q, *J* = 7.1 Hz, 2H), 3.58 (sept, *J* = 6.8 Hz, 1H), 1.36 (t, *J* = 7.1 Hz, 3H), 1.24 (d, *J* = 6.9 Hz, 6H); **<sup>13</sup>C NMR** (100 MHz, CDCl<sub>3</sub>): δ 162.2, 142.1, 140.7, 136.4, 132.9, 129.7, 128.5, 128.3, 119.0, 115.2, 108.2, 59.9, 48.7, 26.6, 24.2, 14.6; **HRMS** (ESI) Calcd for C<sub>19</sub>H<sub>24</sub>NO<sub>2</sub> [M + H]<sup>+</sup> 298.1807, found 298.1805.

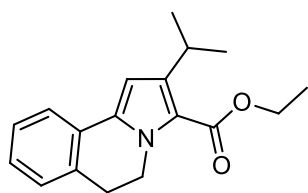

**Ethyl 2-isopropyl-5,6-dihydropyrrolo[2,1-*a*]isoquinoline-3-carboxylate (3aaa):** Yellow oil (73%, eluent = hexane/EtOAc (95:5));  $^1\text{H NMR}$  (400 MHz,  $\text{CDCl}_3$ )  $\delta$  7.55 (d,  $J = 7.6$  Hz, 1H), 7.28–7.19 (m, 1H), 7.20–7.09 (m, 2H), 6.50 (s, 1H), 4.63–4.52 (m, 2H), 4.35 (d,  $J = 7.1$  Hz, 2H), 3.56 (sept,  $J = 6.8$  Hz, 1H), 3.04 (t,  $J = 6.8$  Hz, 2H), 1.38 (t,  $J = 7.1$  Hz, 3H), 1.27 (s, 3H), 1.25 (s, 3H);  $^{13}\text{C NMR}$  (100 MHz,  $\text{CDCl}_3$ )  $\delta$  162.4, 142.5, 135.1, 132.1, 128.6, 127.9, 127.4, 127.2, 123.8, 118.5, 103.0, 59.9, 42.8, 29.3, 26.5, 24.2, 14.6. **HRMS** (ESI) Calcd for  $\text{C}_{18}\text{H}_{22}\text{NO}_2$   $[\text{M} + \text{H}]^+$  284.1651, found 284.1652.

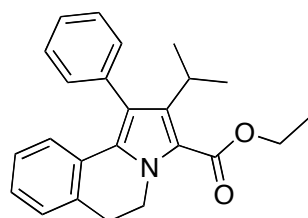

**Ethyl 2-isopropyl-1-phenyl-5,6-dihydropyrrolo[2,1-*a*]isoquinoline-3-carboxylate (3aba):** White solid (48%, eluent = hexane/EtOAc (98:2)); Mp = 135–136 °C;  $^1\text{H NMR}$  (400 MHz,  $\text{CDCl}_3$ ):  $\delta$  7.42–7.36 (m, 3H), 7.33–7.27 (m, 2H), 7.15 (d,  $J = 7.5$  Hz, 1H), 7.04 (t,  $J = 7.4$  Hz, 1H), 6.85 (t,  $J = 7.7$  Hz, 1H), 6.68 (d,  $J = 7.9$  Hz, 1H), 4.54 (t,  $J = 6.6$  Hz, 2H), 4.37 (q,  $J = 7.1$  Hz, 2H), 3.33 (sept,  $J = 7.1$  Hz, 1H), 3.05 (t,  $J = 6.6$  Hz, 2H), 1.41 (t,  $J = 7.1$  Hz, 3H), 1.16 (d,  $J = 7.2$  Hz, 6H);  $^{13}\text{C NMR}$  (100 MHz,  $\text{CDCl}_3$ ):  $\delta$  162.7, 138.2, 137.5, 133.5, 131.6, 131.1, 128.9, 128.7, 127.8, 127.3, 126.8, 126.7, 125.3, 123.1, 118.7, 60.3, 43.0, 29.9, 26.5, 22.8, 14.6; **HRMS** (ESI) Calcd for  $\text{C}_{24}\text{H}_{26}\text{NO}_2$   $[\text{M} + \text{H}]^+$  360.1964, found 360.1960.

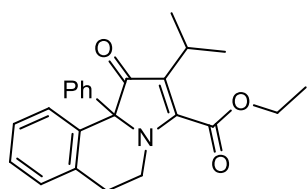

**Ethyl 2-isopropyl-1-oxo-10*b*-phenyl-1,5,6,10*b*-tetrahydropyrrolo[2,1-*a*]isoquinoline-3-carboxylate (3aba'):** Orange oil (50%, eluent = hexane/EtOAc (96:4));  $^1\text{H NMR}$  (400 MHz,  $\text{CDCl}_3$ )  $\delta$  7.88 (dd,  $J = 7.6, 1.6$  Hz, 1H), 7.38–7.25 (m, 5H), 7.20–7.18 (m, 1H), 7.12–6.91 (m, 2H), 4.47 (q,  $J = 6.9$  Hz, 2H), 3.73–3.67 (m, 1H), 3.58–3.43 (m, 1H), 3.02–3.98 (m, 1H), 2.89–2.66 (m, 2H), 1.45 (t,  $J = 7.1$  Hz, 3H), 1.22 (d,  $J = 10.8$ , 3H), 1.21 (d,  $J = 10.8$ , 3H);  $^{13}\text{C}$

**NMR** (100 MHz, CDCl<sub>3</sub>)  $\delta$  201.5, 163.1, 162.0, 140.9, 134.3, 133.1, 128.5, 128.5, 128.4, 127.8, 127.7, 127.4, 126.6, 120.1, 73.3, 62.4, 41.6, 29.5, 24.2, 21.21, 21.15, 14.2; **HRMS** (ESI) Calcd for C<sub>24</sub>H<sub>26</sub>NO<sub>3</sub> [M + H]<sup>+</sup> 376.1913, found 376.1908.

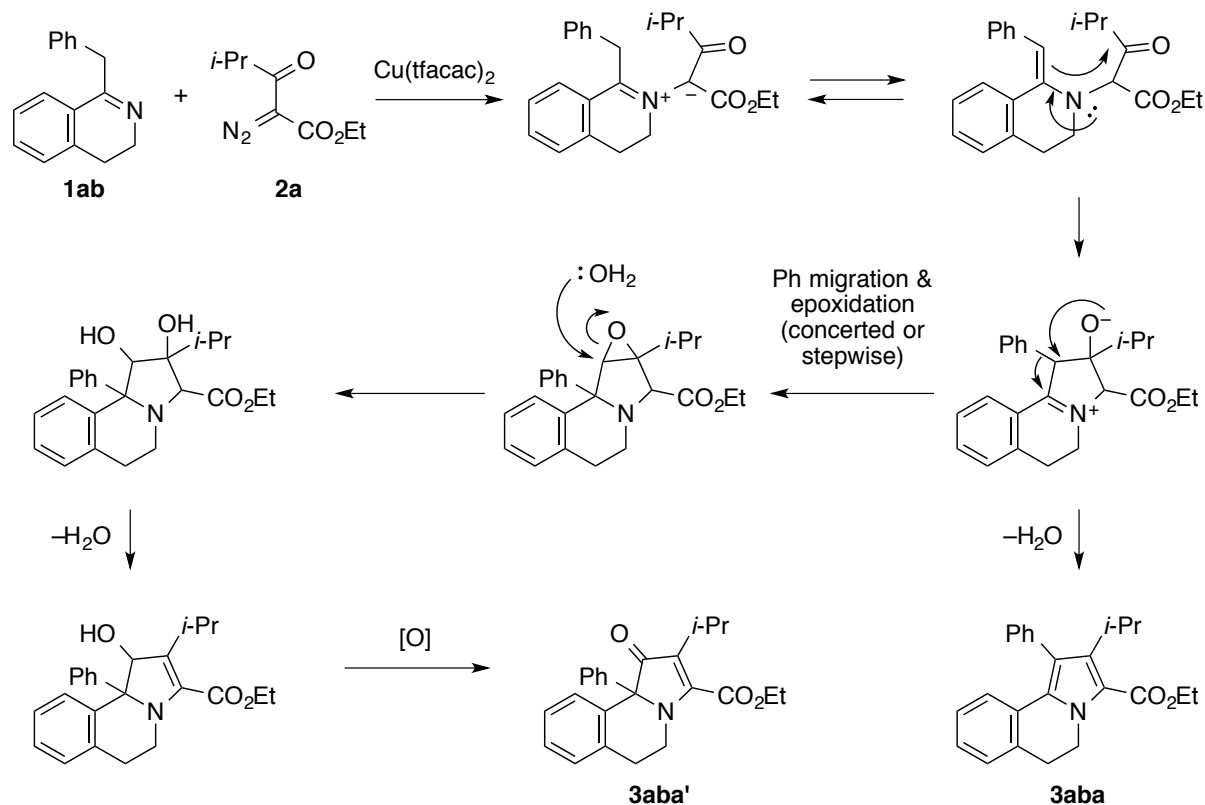

**Scheme S1.** Outline of possible pathways for the formation of pyrrole **3aba** and 5,6-dihydropyrrolo[2,1-*a*]isoquinoline **3aba'**

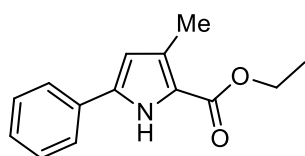

**Ethyl 3-methyl-5-phenyl-1H-pyrrole-2-carboxylate (3acb):** White solid (35%, eluent = hexane/EtOAc (96:4)); Mp = 114-116 °C; <sup>1</sup>H NMR (400 MHz, CDCl<sub>3</sub>)  $\delta$  9.15 (s, 1H), 7.59 – 7.54 (m, 2H), 7.42 (t, *J* = 7.7 Hz, 2H), 7.34 – 7.27 (m, 1H), 6.41 (d, *J* = 3.0 Hz, 1H), 4.37 (q, *J* = 7.1 Hz, 2H), 2.41 (s, 3H), 1.41 (t, *J* = 7.1 Hz, 3H); <sup>13</sup>C NMR (100 MHz, CDCl<sub>3</sub>)  $\delta$  161.8, 135.1, 131.4, 129.4, 129.0, 127.6, 124.6, 119.9, 110.2, 60.1, 14.6, 13.0; **HRMS** (ESI) Calcd for C<sub>14</sub>H<sub>16</sub>NO<sub>2</sub> [M + H]<sup>+</sup> 230.1181, found 230.1183.



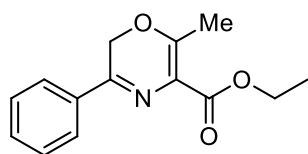

**Ethyl 6-methyl-3-phenyl-2H-1,4-oxazine-5-carboxylate (4):**<sup>8</sup> Yellow oil (22%, eluent = hexane/EtOAc (96:4)); <sup>1</sup>H NMR (400 MHz, CDCl<sub>3</sub>) δ 7.97– 7.76 (m, 2H), 7.51–7.39 (m, 3H), 4.82 (s, 2H), 4.37 (q, *J* = 7.1 Hz, 2H), 2.41 (s, 3H), 1.42 (t, *J* = 7.1 Hz, 3H); <sup>13</sup>C NMR (100 MHz, CDCl<sub>3</sub>) δ 165.8, 157.6, 148.3, 135.0, 130.6, 128.7, 126.6, 120.7, 62.0, 60.6, 17.9, 14.4; HRMS (ESI) Calcd for C<sub>14</sub>H<sub>16</sub>NO<sub>3</sub> [M + H]<sup>+</sup> 246.1130, found 246.1136.

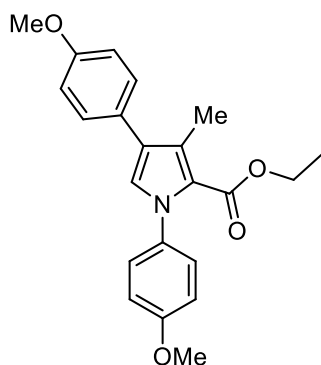

**Ethyl 1,4-bis(4-methoxyphenyl)-3-methyl-1H-pyrrole-2-carboxylate (3adb):** Yellow oil (32%, eluent = hexane/EtOAc (98:2)); <sup>1</sup>H NMR (400 MHz, CDCl<sub>3</sub>) δ 7.34 (d, *J* = 8.5 Hz, 2H), 7.25 (d, *J* = 8.7 Hz, 2H), 6.98-6.94 (m, 4H), 6.89 (s, 1H), 4.18 (q, *J* = 7.1 Hz, 2H), 3.868 (s, 3H), 3.866 (s, 3H), 2.47 (s, 3H), 1.17 (t, *J* = 7.1 Hz, 3H); <sup>13</sup>C NMR (100 MHz, CDCl<sub>3</sub>) δ 161.5, 158.8, 158.3, 134.5, 129.7, 127.5, 127.32, 127.28, 126.8, 125.8, 121.6, 113.9, 113.6, 59.7, 55.5, 55.3, 14.2, 12.2; HRMS (ESI) Calcd for C<sub>22</sub>H<sub>24</sub>NO<sub>4</sub> [M + H]<sup>+</sup> 366.1705, found 366.1701.

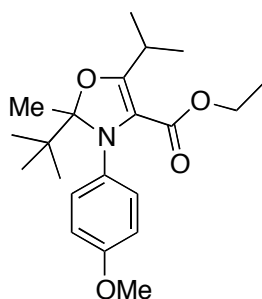

**Ethyl 2-(*t*-butyl)-5-isopropyl-3-(4-methoxyphenyl)-2-methyl-2,3-dihydrooxazole-4-carboxylate (5a):** Orange oil (95% yield, eluent = hexane/EtOAc (95:5)); <sup>1</sup>H NMR (400 MHz, CDCl<sub>3</sub>): δ 7.07 (s, 2H), 6.80 (d, *J* = 9.1 Hz, 2H), 4.09 (dq, *J* = 10.8, 7.1 Hz, 1H), 3.94 (dq, *J* = 10.8, 7.1 Hz, 1H), 3.79 (s, 3H), 3.64 (sept, *J* = 7.0 Hz, 1H), 1.28 (d, *J* = 7.0 Hz, 3H),

1.24 (d,  $J = 6.9$  Hz, 3H), 1.11 (s, 9H), 1.10 (s, 3H), 1.01 (t,  $J = 7.1$  Hz, 3H);  $^{13}\text{C}$  NMR (100 MHz,  $\text{CDCl}_3$ ):  $\delta$  164.0, 163.0, 156.7, 140.7, 116.3, 113.6, 108.7, 59.3, 55.3, 41.4, 26.0, 25.0, 20.1, 19.8, 19.7, 14.1; **HRMS** (ESI) Calcd for  $\text{C}_{21}\text{H}_{32}\text{NO}_4$   $[\text{M} + \text{H}]^+$  362.2331, found 362.2327.

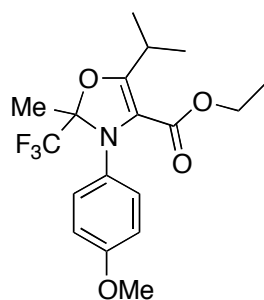

**Ethyl 5-isopropyl-3-(4-methoxyphenyl)-2-methyl-2-(trifluoromethyl)-2,3-dihydrooxazole-4-carboxylate (5b)**: Yellow oil (70% yield, eluent = hexane/EtOAc (95:5));  $^1\text{H}$  NMR (400 MHz,  $\text{CDCl}_3$ ):  $\delta$  7.13 (s, 1H), 6.95 (s, 1H), 6.85 (s, 2H), 4.14 (dq,  $J = 10.8, 7.1$  Hz, 1H), 3.96 (dq,  $J = 10.8, 7.1$  Hz, 1H), 3.81 (s, 3H), 3.64 (sept,  $J = 7.0$  Hz, 1H), 1.31 (s, 3H), 1.27 (d,  $J = 7.0$  Hz, 3H), 1.22 (d,  $J = 6.9$  Hz, 3H), 1.02 (t,  $J = 7.1$  Hz, 3H);  $^{13}\text{C}$  NMR (100 MHz,  $\text{CDCl}_3$ ):  $\delta$  163.1, 162.1, 157.9, 137.2, 129.4, 125.9, 123.3 (q,  $J_{\text{C-F}} = 287.4$  Hz), 115.9, 114.3, 114.0, 98.6 (q,  $J_{\text{C-F}} = 31.4$  Hz), 60.2, 55.6, 26.0, 20.3, 19.2, 17.5, 14.1; **HRMS** (ESI) Calcd for  $\text{C}_{18}\text{H}_{23}\text{F}_3\text{NO}_4$   $[\text{M} + \text{H}]^+$  374.1579, found 374.1578.

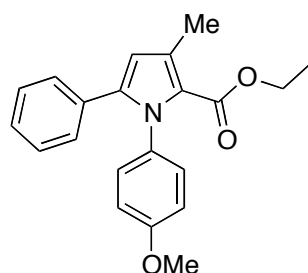

**Ethyl 1-(4-methoxyphenyl)-3-methyl-5-phenyl-1H-pyrrole-2-carboxylate (3ab)**: Yellow solid (81% yield, eluent = hexane/EtOAc (95:5)); Mp = 104–105 °C;  $^1\text{H}$  NMR (400 MHz,  $\text{CDCl}_3$ ):  $\delta$  7.17–7.15 (m, 3H), 7.12–7.01 (m, 4H), 6.81 (d,  $J = 8.9$  Hz, 2H), 6.26 (s, 1H), 4.12 (q,  $J = 7.1$  Hz, 2H), 3.79 (s, 3H), 2.44 (s, 3H), 1.16 (t,  $J = 7.1$  Hz, 3H);  $^{13}\text{C}$  NMR (100 MHz,  $\text{CDCl}_3$ ):  $\delta$  161.7, 159.0, 140.1, 133.1, 132.4, 130.3, 129.9, 129.1, 128.2, 127.4, 122.6, 113.6, 112.9, 59.7, 55.6, 14.5, 14.4; **HRMS** (ESI) Calcd for  $\text{C}_{21}\text{H}_{22}\text{NO}_3$   $[\text{M} + \text{H}]^+$  336.1600, found 336.1599.

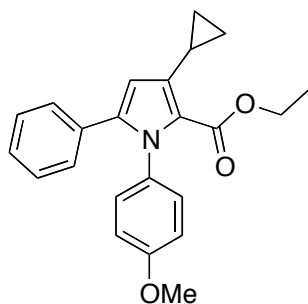

**Ethyl 3-cyclopropyl-1-(4-methoxyphenyl)-5-phenyl-1H-pyrrole-2-carboxylate (3ac):**

Yellow solid (80% yield, eluent = hexane/EtOAc (95:5)); Mp = 108–109 °C;  $^1\text{H NMR}$  (400 MHz,  $\text{CDCl}_3$ ):  $\delta$  7.19–7.10 (m, 3H), 7.10–7.00 (m, 4H), 6.80 (d,  $J = 8.8$  Hz, 2H), 5.95 (s, 1H), 4.13 (q,  $J = 7.1$  Hz, 2H), 3.78 (s, 3H), 2.60 (tt,  $J = 8.5, 5.2$  Hz, 1H), 1.13 (t,  $J = 7.1$  Hz, 3H), 1.05 – 0.90 (m, 2H), 0.75 – 0.59 (m, 2H);  $^{13}\text{C NMR}$  (100 MHz,  $\text{CDCl}_3$ ):  $\delta$  161.9, 159.0, 140.5, 137.4, 133.1, 132.4, 129.9, 129.1, 128.2, 127.4, 123.1, 113.6, 106.7, 59.8, 55.5, 14.4, 9.3, 8.7; **HRMS** (ESI) Calcd for  $\text{C}_{23}\text{H}_{24}\text{NO}_3$  [ $\text{M} + \text{H}$ ] $^+$  362.1756, found 362.1754.

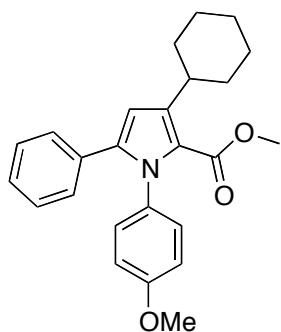

**Methyl 3-cyclohexyl-1-(4-methoxyphenyl)-5-phenyl-1H-pyrrole-2-carboxylate (3ad):**

Yellow solid (88% yield, eluent = hexane/EtOAc (95:5)); Mp = 128–130 °C;  $^1\text{H NMR}$  (400 MHz,  $\text{CDCl}_3$ ):  $\delta$  7.18–7.13 (m, 3H), 7.11–7.06 (m, 4H), 6.81 (d,  $J = 8.9$  Hz, 2H), 6.33 (s, 1H), 3.79 (s, 3H), 3.64 (s, 3H), 3.23–3.17 (m, 1H), 1.99–1.97 (m, 2H), 1.89–1.71 (m, 3H), 1.50–1.37 (m, 4H), 1.32–1.25 (m, 1H);  $^{13}\text{C NMR}$  (100 MHz,  $\text{CDCl}_3$ ):  $\delta$  162.2, 158.9, 141.1, 140.4, 133.1, 132.6, 129.8, 129.1, 128.1, 127.3, 121.2, 113.6, 109.1, 55.5, 51.0, 36.7, 34.7, 27.2, 26.6; **HRMS** (ESI) Calcd for  $\text{C}_{25}\text{H}_{28}\text{NO}_3$  [ $\text{M} + \text{H}$ ] $^+$  390.2069, found 390.2066.

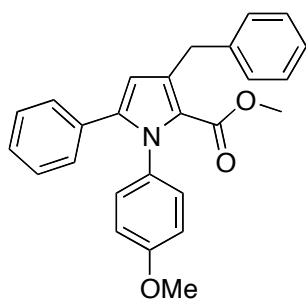

**Methyl 3-benzyl-1-(4-methoxyphenyl)-5-phenyl-1H-pyrrole-2-carboxylate (3ae):** Yellow solid (94% yield, eluent = hexane/EtOAc (95:5)); Mp = 139–141 °C; <sup>1</sup>H NMR (400 MHz, CDCl<sub>3</sub>): δ 7.35–7.27 (m, 4H), 7.24–7.16 (m, 1H), 7.16–7.01 (m, 7H), 6.82 (d, *J* = 8.8 Hz, 2H), 6.14 (s, 1H), 4.22 (s, 2H), 3.79 (s, 3H), 3.65 (s, 3H); <sup>13</sup>C NMR (100 MHz, CDCl<sub>3</sub>): δ 162.0, 159.1, 141.5, 140.5, 133.5, 132.8, 132.2, 129.8, 129.2, 129.1, 128.6, 128.2, 127.4, 126.1, 121.9, 113.7, 112.3, 55.5, 51.0, 34.4; **HRMS** (ESI) Calcd for C<sub>26</sub>H<sub>24</sub>NO<sub>3</sub> [M + H]<sup>+</sup> 398.1756, found 398.1757.

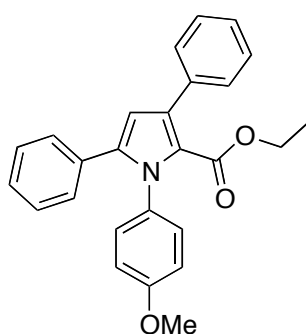

**Ethyl 1-(4-methoxyphenyl)-3,5-diphenyl-1H-pyrrole-2-carboxylate (3af):** Yellow solid (77% yield, eluent = hexane/EtOAc (95:5)); Mp = 125–127 °C; <sup>1</sup>H NMR (400 MHz, CDCl<sub>3</sub>): δ 7.52 (d, *J* = 7.2 Hz, 2H), 7.38 (t, *J* = 7.4 Hz, 2H), 7.30 (t, *J* = 7.3 Hz, 1H), 7.20 – 7.08 (m, 7H), 6.84 (d, *J* = 8.8 Hz, 2H), 6.46 (s, 1H), 3.97 (q, *J* = 7.1 Hz, 2H), 3.79 (s, 3H), 0.90 (t, *J* = 7.1 Hz, 3H); <sup>13</sup>C NMR (100 MHz, CDCl<sub>3</sub>): δ 161.4, 159.0, 139.6, 136.2, 133.2, 132.3, 132.0, 129.6, 129.5, 129.0, 128.1, 127.7, 127.3, 126.8, 121.9, 113.6, 111.9, 60.0, 55.4, 13.7; **HRMS** (ESI) Calcd for C<sub>26</sub>H<sub>24</sub>NO<sub>3</sub> [M + H]<sup>+</sup> 398.1756, found 398.1752.

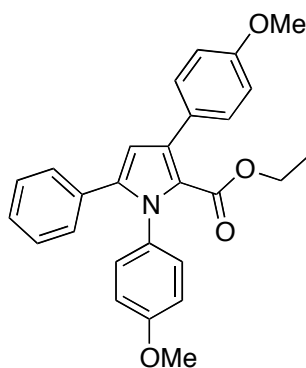

**Ethyl 1,3-bis(4-methoxyphenyl)-5-phenyl-1H-pyrrole-2-carboxylate (3ag):** Yellow solid (77% yield, eluent = hexane/EtOAc (95:5)); Mp = 107–108 °C; <sup>1</sup>H NMR (400 MHz, CDCl<sub>3</sub>): δ 7.47 (d, *J* = 8.7 Hz, 2H), 7.23–7.06 (m, 7H), 6.93 (d, *J* = 8.7 Hz, 2H), 6.84 (d, *J* = 8.8 Hz, 2H), 6.43 (s, 1H), 3.98 (q, *J* = 7.1 Hz, 2H), 3.85 (s, 3H), 3.80 (s, 3H), 0.93 (t, *J* = 7.1 Hz, 3H);

$^{13}\text{C}$  NMR (100 MHz,  $\text{CDCl}_3$ ):  $\delta$  161.6, 159.2, 158.9, 139.8, 133.3, 132.7, 132.3, 130.8, 129.8, 129.2, 128.8, 128.3, 127.5, 121.9, 113.8, 113.4, 112.1, 60.1, 55.6, 55.5, 14.0; **HRMS** (ESI) Calcd for  $\text{C}_{27}\text{H}_{26}\text{NO}_4$   $[\text{M} + \text{H}]^+$  428.1862, found 428.1857.

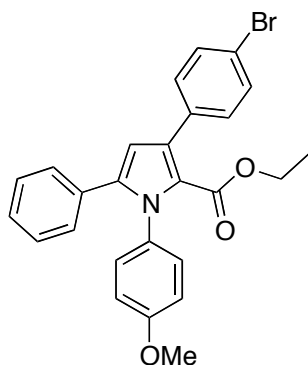

**Ethyl 3-(4-bromophenyl)-1-(4-methoxyphenyl)-5-phenyl-1H-pyrrole-2-carboxylate (3ah):** Orange solid (86% yield, eluent = hexane/EtOAc (95:5)); Mp = 109–110 °C;  $^1\text{H}$  NMR (400 MHz,  $\text{CDCl}_3$ ):  $\delta$  7.50 (d,  $J$  = 8.4 Hz, 2H), 7.41 (d,  $J$  = 8.5 Hz, 2H), 7.23–7.10 (m, 7H), 6.84 (d,  $J$  = 8.9 Hz, 2H), 6.42 (s, 1H), 3.98 (q,  $J$  = 7.1 Hz, 2H), 3.80 (s, 3H), 0.93 (t,  $J$  = 7.1 Hz, 3H);  $^{13}\text{C}$  NMR (100 MHz,  $\text{CDCl}_3$ ):  $\delta$  161.3, 159.3, 140.0, 135.4, 132.4, 132.2, 132.0, 131.4, 131.0, 129.7, 129.2, 128.3, 127.7, 122.0, 121.1, 113.8, 111.9, 60.3, 55.6, 13.9; **HRMS** (ESI) Calcd for  $\text{C}_{26}\text{H}_{23}\text{BrNO}_3$   $[\text{M} + \text{H}]^+$  470.0861, found 476.0860.

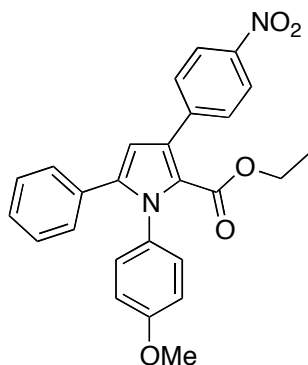

**Ethyl 1-(4-methoxyphenyl)-3-(4-nitrophenyl)-5-phenyl-1H-pyrrole-2-carboxylate (3ai):** Orange solid (80% yield, eluent = hexane/EtOAc (95:5)); Mp = 122–123 °C;  $^1\text{H}$  NMR (400 MHz,  $\text{CDCl}_3$ ):  $\delta$  8.25 (d,  $J$  = 8.8 Hz, 2H), 7.70 (d,  $J$  = 8.7 Hz, 2H), 7.24–7.19 (m, 3H), 7.17–7.10 (m, 4H), 6.86 (d,  $J$  = 8.8 Hz, 2H), 6.48 (s, 1H), 3.99 (q,  $J$  = 7.1 Hz, 2H), 3.82 (s, 3H), 0.92 (t,  $J$  = 7.1 Hz, 3H);  $^{13}\text{C}$  NMR (100 MHz,  $\text{CDCl}_3$ ):  $\delta$  161.1, 159.5, 146.9, 143.50, 140.4, 132.1, 131.7, 130.9, 130.4, 129.7, 129.2, 128.4, 127.9, 123.2, 122.4, 113.9, 111.8, 60.5, 55.6, 13.9; **HRMS** (ESI) Calcd for  $\text{C}_{26}\text{H}_{23}\text{N}_2\text{O}_5$   $[\text{M} + \text{H}]^+$  443.1607, found 443.1611.

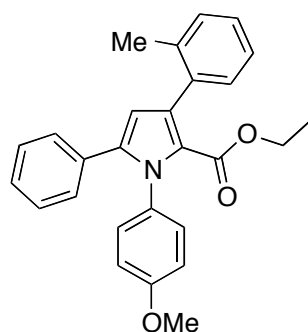

**Ethyl 1-(4-methoxyphenyl)-5-phenyl-3-(*o*-tolyl)-1*H*-pyrrole-2-carboxylate (3aj):** Yellow solid (67% yield, eluent = hexane/EtOAc (95:5)); Mp = 114–116 °C;  $^1\text{H NMR}$  (400 MHz,  $\text{CDCl}_3$ ):  $\delta$  7.33–7.12 (m, 11H), 6.86 (d,  $J = 8.8$  Hz, 2H), 6.35 (s, 1H), 3.87 (q,  $J = 7.1$  Hz, 2H), 3.81 (s, 3H), 2.28 (s, 3H), 0.76 (t,  $J = 7.1$  Hz, 3H);  $^{13}\text{C NMR}$  (100 MHz,  $\text{CDCl}_3$ ):  $\delta$  161.3, 159.2, 140.0, 137.1, 136.9, 133.4, 132.6, 132.2, 130.2, 129.9, 129.5, 129.1, 128.3, 127.5, 127.2, 125.2, 122.6, 113.8, 112.3, 59.8, 55.0, 20.6, 13.6; **HRMS** (ESI) Calcd for  $\text{C}_{27}\text{H}_{26}\text{NO}_3$   $[\text{M} + \text{H}]^+$  412.1913, found 412.1908.

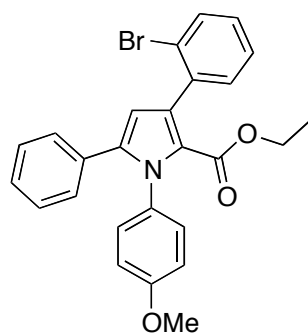

**Ethyl 3-(2-bromophenyl)-1-(4-methoxyphenyl)-5-phenyl-1*H*-pyrrole-2-carboxylate (3ak):** Orange solid (60% yield, eluent = hexane/EtOAc (95:5)); Mp = 117–119 °C;  $^1\text{H NMR}$  (400 MHz,  $\text{CDCl}_3$ ):  $\delta$  7.63 (d,  $J = 8.0$  Hz, 1H), 7.41 (dd,  $J = 7.6, 1.6$  Hz, 1H), 7.32 (t,  $J = 7.5$  Hz, 1H), 7.22–7.12 (m, 8H), 6.86 (d,  $J = 8.8$  Hz, 2H), 6.40 (s, 1H), 3.91 (q,  $J = 7.1$  Hz, 2H), 3.80 (s, 3H), 0.80 (t,  $J = 7.1$  Hz, 3H);  $^{13}\text{C NMR}$  (100 MHz,  $\text{CDCl}_3$ ):  $\delta$  160.9, 159.3, 139.8, 138.5, 132.4, 132.4, 132.3, 132.1, 131.6, 129.9, 129.1, 128.5, 128.3, 127.5, 126.9, 124.7, 122.8, 113.8, 112.2, 60.0, 55.6, 13.6; **HRMS** (ESI) Calcd for  $\text{C}_{26}\text{H}_{23}\text{BrNO}_3$   $[\text{M} + \text{H}]^+$  476.0861, found 476.0864.

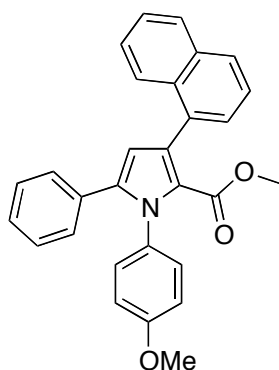

**Methyl 1-(4-methoxyphenyl)-3-(naphthalen-1-yl)-5-phenyl-1H-pyrrole-2-carboxylate (3al):** Orange solid (74% yield, eluent = hexane/EtOAc (90:10)); Mp = 125–127 °C;  $^1\text{H NMR}$  (400 MHz,  $\text{CDCl}_3$ ):  $\delta$  8.03–7.94 (m, 1H), 7.91–7.85 (m, 1H), 7.83 (dd,  $J$  = 5.9, 3.6 Hz, 1H), 7.55–7.47 (m, 2H), 7.44 (tt,  $J$  = 12.6, 3.4 Hz, 2H), 7.28–7.16 (m, 7H), 6.88 (d,  $J$  = 9.0 Hz, 2H), 6.52 (s, 1H), 3.80 (s, 3H), 3.15 (s, 3H);  $^{13}\text{C NMR}$  (100 MHz,  $\text{CDCl}_3$ ):  $\delta$  161.8, 159.3, 140.2, 135.0, 133.7, 132.7, 132.4, 132.1, 131.6, 129.9, 129.1, 128.3, 128.3, 127.6, 127.5, 127.4, 126.5, 125.9, 125.7, 125.3, 123.2, 113.9, 113.5, 55.5, 50.9; **HRMS** (ESI) Calcd for  $\text{C}_{29}\text{H}_{24}\text{NO}_3$   $[\text{M} + \text{H}]^+$  434.1756, found 434.1759.

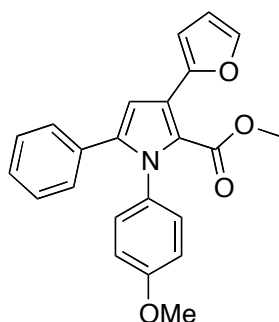

**Methyl 3-(furan-2-yl)-1-(4-methoxyphenyl)-5-phenyl-1H-pyrrole-2-carboxylate (3am):** Orange solid (70% yield, eluent = hexane/EtOAc (95:5)); Mp = 140–141 °C;  $^1\text{H NMR}$  (400 MHz,  $\text{CDCl}_3$ ):  $\delta$  7.47 (d,  $J$  = 1.2 Hz, 1H), 7.22–7.16 (m, 3H), 7.15–7.04 (m, 4H), 6.91 (d,  $J$  = 3.3 Hz, 1H), 6.83 (d,  $J$  = 8.9 Hz, 2H), 6.76 (s, 1H), 6.49 (dd,  $J$  = 3.3, 1.8 Hz, 1H), 3.80 (s, 3H), 3.64 (s, 3H);  $^{13}\text{C NMR}$  (100 MHz,  $\text{CDCl}_3$ ):  $\delta$  161.6, 159.2, 149.2, 141.7, 140.4, 132.4, 131.9, 129.6, 129.2, 128.3, 127.7, 122.9, 120.7, 113.8, 111.6, 110.0, 109.0, 55.6, 51.3; **HRMS** (ESI) Calcd for  $\text{C}_{23}\text{H}_{20}\text{NO}_4$   $[\text{M} + \text{H}]^+$  374.1392, found 374.1395.

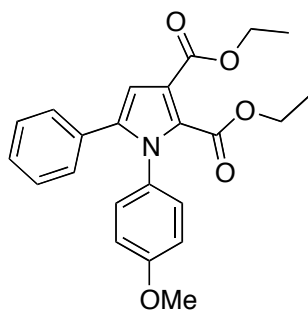

**Diethyl 1-(4-methoxyphenyl)-5-phenyl-1H-pyrrole-2,3-dicarboxylate (3an):** Yellow oil (79% yield, eluent = hexane/EtOAc (95:5));  $^1\text{H NMR}$  (400 MHz,  $\text{CDCl}_3$ ):  $\delta$  7.23–7.15 (m, 3H), 7.14–7.02 (m, 4H), 6.83 (d,  $J = 8.9$  Hz, 2H), 6.75 (s, 1H), 4.33 (q,  $J = 7.1$  Hz, 2H), 4.16 (q,  $J = 7.1$  Hz, 2H), 3.80 (s, 3H), 1.35 (t,  $J = 7.1$  Hz, 3H), 1.13 (d,  $J = 7.1$  Hz, 3H);  $^{13}\text{C NMR}$  (100 MHz,  $\text{CDCl}_3$ ):  $\delta$  164.5, 161.9, 159.7, 137.3, 131.5, 130.8, 129.5, 129.3, 129.0, 128.4, 127.7, 118.5, 114.1, 110.5, 61.6, 60.7, 55.6, 14.5, 14.1; **HRMS** (ESI) Calcd for  $\text{C}_{23}\text{H}_{24}\text{NO}_5$   $[\text{M} + \text{H}]^+$  394.1654, found 394.1658.

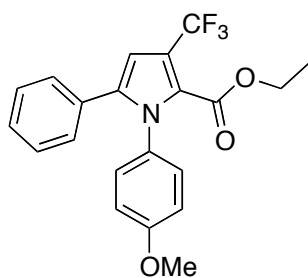

**Ethyl 1-(4-methoxyphenyl)-5-phenyl-3-(trifluoromethyl)-1H-pyrrole-2-carboxylate (3ao):** Yellow solid (41% yield, eluent = hexane/EtOAc (95:5)); Mp = 111–113 °C;  $^1\text{H NMR}$  (400 MHz,  $\text{CDCl}_3$ ):  $\delta$  7.21–7.19 (m, 3H), 7.15–7.02 (m, 4H), 6.84 (d,  $J = 8.9$  Hz, 2H), 6.65 (s, 1H), 4.18 (q,  $J = 7.1$  Hz, 2H), 3.80 (s, 3H), 1.21 (t,  $J = 7.1$  Hz, 3H);  $^{13}\text{C NMR}$  (100 MHz,  $\text{CDCl}_3$ ): 159.69, 159.66, 139.2, 131.2, 131.1, 129.6, 129.3, 128.4, 128.1, 126.2 (q,  $J_{\text{C-F}} = 3.3$  Hz), 123.2 (q,  $J_{\text{C-F}} = 265.0$  Hz), 120.5 (q,  $J_{\text{C-F}} = 37.2$  Hz), 114.0, 109.3 (q,  $J_{\text{C-F}} = 4.2$  Hz), 61.2, 55.6, 13.9; **HRMS** (ESI) Calcd for  $\text{C}_{21}\text{H}_{19}\text{F}_3\text{NO}_3$   $[\text{M} + \text{H}]^+$  390.1317, found 390.1297.

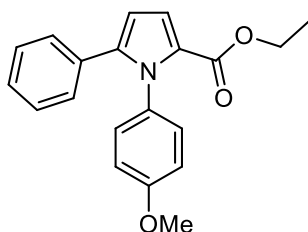

**Ethyl 1-(4-methoxyphenyl)-5-phenyl-1H-pyrrole-2-carboxylate (3ap):** White solid (41% yield, eluent = hexane/EtOAc (95:5)); Mp = 132–133 °C;  $^1\text{H NMR}$  (400 MHz,  $\text{CDCl}_3$ )  $\delta$



7.23–7.08 (m, 8H), 6.84 (d,  $J = 8.8$  Hz, 2H), 6.40 (d,  $J = 4.0$  Hz, 1H), 4.16 (q,  $J = 7.1$  Hz, 2H), 3.80 (s, 3H), 1.22 (t,  $J = 7.1$  Hz, 3H);  $^{13}\text{C}$  NMR (100 MHz,  $\text{CDCl}_3$ )  $\delta$  160.8, 159.2, 141.6, 132.4, 132.2, 129.8, 129.1, 128.3, 127.5, 125.4, 118.4, 113.8, 109.9, 60.0, 55.6, 14.6; HRMS (ESI) Calcd for  $\text{C}_{20}\text{H}_{20}\text{NO}_3$   $[\text{M} + \text{H}]^+$  322.1443, found 322.1444.

## Cu/Yb-Catalyzed Condensation of Imine with $\alpha$ -Diazo- $\beta$ -diketone

**Table S1.** Screening of Cocatalysts

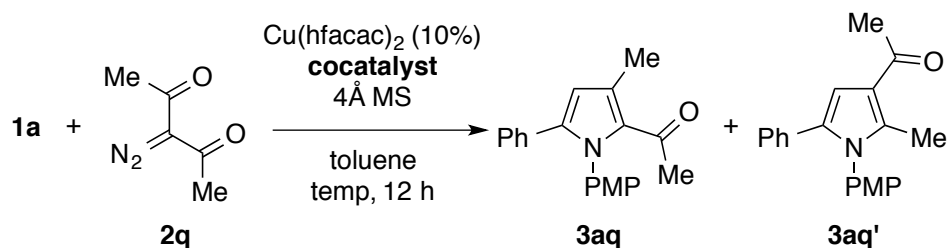

| entry    | cocatalyst                       | temp (°C) | yield (%) <sup>a</sup> |                 |
|----------|----------------------------------|-----------|------------------------|-----------------|
|          |                                  |           | <b>3aq</b>             | <b>3aq'</b>     |
| 1        | none                             | 110       | 11 <sup>b</sup>        | 12 <sup>b</sup> |
| 2        | Yb(OTf) <sub>3</sub> (10%)       | 110       | 36                     | 5               |
| 3        | Gd(OTf) <sub>3</sub> (10%)       | 110       | 23                     | trace           |
| 4        | La(OTf) <sub>3</sub> (10%)       | 110       | 22                     | trace           |
| 5        | In(OTf) <sub>3</sub> (10%)       | 110       | 23                     | trace           |
| <b>6</b> | <b>Yb(OTf)<sub>3</sub> (10%)</b> | <b>80</b> | <b>57<sup>b</sup></b>  | <b>trace</b>    |
| 7        | Yb(OTf) <sub>3</sub> (20%)       | 80        | 21                     | trace           |

<sup>a</sup> Determined by GC using *n*-tridecane as an internal standard. <sup>b</sup> Isolated yield.

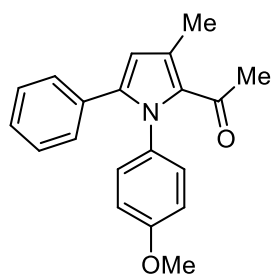

**1-(1-(4-Methoxyphenyl)-3-methyl-5-phenyl-1H-pyrrol-2-yl)ethanone (3aq):** Brown solid (57% yield, eluent = hexane/EtOAc (95:5)); Mp = 118–120 °C; <sup>1</sup>H NMR (400 MHz, CDCl<sub>3</sub>):  $\delta$  7.23–7.14 (m, 3H), 7.10–7.03 (m, 4H), 6.83 (d, *J* = 8.8 Hz, 2H), 6.26 (s, 1H), 3.80 (s, 3H), 2.46 (s, 3H), 2.15 (s, 3H); <sup>13</sup>C NMR (100 MHz, CDCl<sub>3</sub>):  $\delta$  189.1, 159.2, 140.4, 133.1, 132.5, 132.2, 130.0, 129.8, 129.2, 128.2, 127.6, 114.0, 113.6, 55.6, 30.7, 15.3; HRMS (ESI) Calcd for C<sub>20</sub>H<sub>20</sub>NO<sub>2</sub> [M + H]<sup>+</sup> 306.1494, found 306.1490.

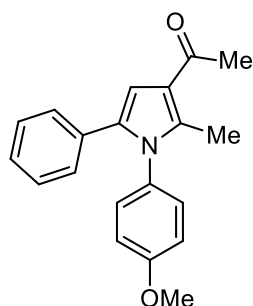

**1-(1-(4-Methoxyphenyl)-2-methyl-5-phenyl-1H-pyrrol-3-yl)ethanone (3aq')**: Brown solid (12% yield obtained in the absence of Yb(OTf)<sub>3</sub>, eluent = hexane/EtOAc (98:2)); Mp = 98–100 °C; <sup>1</sup>H NMR (400 MHz, CDCl<sub>3</sub>): δ 7.29–7.26 (m, 3H), 7.21–7.18 (m, 2H), 6.95 (d, *J* = 8.9 Hz, 2H), 6.73 (d, *J* = 8.9 Hz, 2H), 6.64 (s, 1H), 3.75 (s, 3H), 2.36 (s, 3H), 1.93 (s, 3H); <sup>13</sup>C NMR (100 MHz, CDCl<sub>3</sub>): δ 196.9, 158.7, 138.5, 133.0, 132.6, 131.5, 128.5, 128.4, 127.6, 124.2, 122.5, 121.4, 114.2, 55.6, 30.9, 12.8; HRMS (ESI) Calcd for C<sub>20</sub>H<sub>20</sub>NO<sub>2</sub> [M + H]<sup>+</sup> 306.1494, found 306.1490.

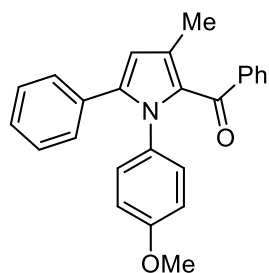

**(1-(4-Methoxyphenyl)-3-methyl-5-phenyl-1H-pyrrol-2-yl)(phenyl)methanone (3ar)**: Yellow oil (50%, eluent = hexane/EtOAc (95:5)); <sup>1</sup>H NMR (400 MHz, CDCl<sub>3</sub>): δ 7.76–7.72 (m, 2H), 7.50–7.45 (m, 1H), 7.38 (t, *J* = 7.5 Hz, 2H), 7.20–7.19 (m, 3H), 7.15–7.09 (m, 2H), 7.05 (d, *J* = 8.9 Hz, 2H), 6.73 (d, *J* = 8.9 Hz, 2H), 6.28 (s, 1H), 3.73 (s, 3H), 1.96 (s, 3H); <sup>13</sup>C NMR (100 MHz, CDCl<sub>3</sub>): δ 188.1, 158.7, 140.6, 140.3, 132.4, 132.2, 132.1, 129.6, 129.4, 129.0, 128.8, 128.4, 128.3, 127.5, 113.9, 113.0, 55.5, 14.0; HRMS (ESI) Calcd for C<sub>25</sub>H<sub>22</sub>NO<sub>2</sub> [M + H]<sup>+</sup> 368.1651, found 368.1653.

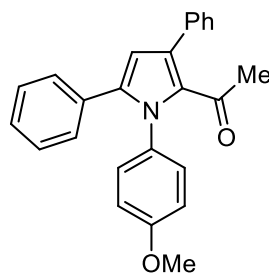

**1-(1-(4-Methoxyphenyl)-3,5-diphenyl-1*H*-pyrrol-2-yl)ethanone (3ar')**: Yellow solid (13%, eluent = hexane/EtOAc (95:5)); Mp = 126-128 °C; <sup>1</sup>H NMR (400 MHz, CDCl<sub>3</sub>) δ 7.51 – 7.33 (m, 5H), 7.21 – 7.17 (m, 3H), 7.15 – 7.11 (m, 4H), 6.84 (d, *J* = 8.9 Hz, 2H), 6.42 (s, 1H), 3.81 (s, 3H), 1.98 (s, 3H); <sup>13</sup>C NMR (100 MHz, CDCl<sub>3</sub>): δ 190.5, 158.9, 140.0, 136.7, 135.7, 134.9, 133.8, 132.5, 131.7, 129.5, 129.0, 128.3, 128.1, 127.5, 127.4, 113.7, 112.3, 55.4, 30.6; HRMS (ESI) Calcd for C<sub>25</sub>H<sub>22</sub>NO<sub>2</sub> [M + H]<sup>+</sup> 368.1651, found 368.1653.

## Application to Lamellarin Scaffolds

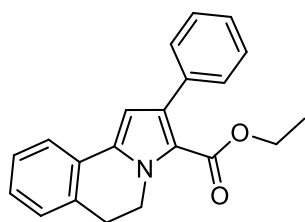

**Ethyl 2-phenyl-5,6-dihydropyrrolo[2,1-*a*]isoquinoline-3-carboxylate (3aaf):** White solid (62% yield, eluent = hexane/EtOAc (95:5)); Mp = 119-121 °C;  $^1\text{H}$  NMR (400 MHz,  $\text{CDCl}_3$ )  $\delta$  7.57 (d,  $J$  = 7.5 Hz, 1H), 7.44-7.41 (m, 2H), 7.37-7.34 (m, 2H), 7.32-7.26 (m, 2H), 7.23-7.22 (m, 2H), 6.57 (s, 1H), 4.73-4.41 (m, 2H), 4.14 (q,  $J$  = 7.1 Hz, 2H), 3.12 (t,  $J$  = 6.8 Hz, 2H), 1.06 (t,  $J$  = 7.1 Hz, 3H);  $^{13}\text{C}$  NMR (100 MHz,  $\text{CDCl}_3$ )  $\delta$  161.9, 136.9, 134.7, 134.4, 132.0, 129.6, 128.1, 127.9, 127.51, 127.45, 127.2, 126.7, 123.6, 118.7, 106.9, 59.9, 42.7, 29.0, 13.8; HRMS (ESI) Calcd for  $\text{C}_{21}\text{H}_{20}\text{NO}_2$   $[\text{M} + \text{H}]^+$  318.1494, found 318.1495.

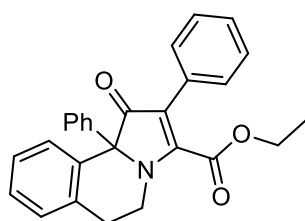

**Ethyl 1-oxo-2,10*b*-diphenyl-1,5,6,10*b*-tetrahydropyrrolo[2,1-*a*]isoquinoline-3-carboxylate (6):** Yellow solid (63% yield, eluent = hexane/EtOAc (93:7)); Mp = 168-169 °C;  $^1\text{H}$  NMR (400 MHz,  $\text{CDCl}_3$ )  $\delta$  8.05-7.94 (m, 1H), 7.42-7.40 (m, 2H), 7.37-7.27 (m, 7H), 7.25-7.19 (m, 2H), 7.17-7.11 (m, 2H), 4.37 (q,  $J$  = 7.2 Hz, 2H), 3.86-3.80 (m, 1H), 3.64-3.57 (m, 1H), 3.08-3.04 (m, 1H), 2.88-2.83 (m, 1H), 1.23 (t,  $J$  = 7.1 Hz, 3H);  $^{13}\text{C}$  NMR (100 MHz,  $\text{CDCl}_3$ )  $\delta$  199.2, 162.9, 162.4, 140.3, 134.0, 132.8, 130.2, 128.61, 128.55, 128.5, 128.2, 127.8, 127.7, 127.7, 126.8, 113.8, 74.2, 62.8, 41.6, 29.9, 13.8; HRMS (ESI) Calcd for  $\text{C}_{27}\text{H}_{24}\text{NO}_3$   $[\text{M} + \text{H}]^+$  410.1756, found 410.1757. Recrystallization from EtOAc/hexane afforded single crystals suitable for X-ray diffraction analysis, which unambiguously confirmed structure of **6** (see below).<sup>9</sup>

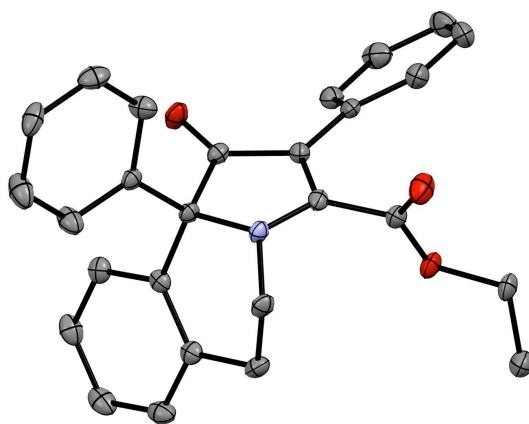

**Figure S2.** ORTEP diagram of **6**. Thermal ellipsoids drawn at 50% probability.

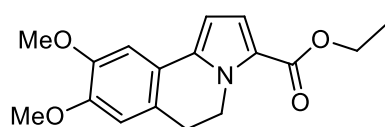

**Ethyl 8,9-dimethoxy-5,6-dihydropyrrolo[2,1-*a*]isoquinoline-3-carboxylate (**3agp**):** White solid (68% yield, eluent = hexane/EtOAc (95:5)); Mp = 134-136 °C; <sup>1</sup>H NMR (400 MHz, CDCl<sub>3</sub>) δ 7.12–6.94 (m, 2H), 6.73 (s, 1H), 6.42 (d, *J* = 4.1 Hz, 1H), 4.61 (t, *J* = 6.8 Hz, 2H), 4.29 (q, *J* = 7.1 Hz, 2H), 3.92 (s, 3H), 3.90 (s, 3H), 3.00 (t, *J* = 6.8 Hz, 2H), 1.36 (t, *J* = 7.1 Hz, 3H); <sup>13</sup>C NMR (100 MHz, CDCl<sub>3</sub>) δ 161.6, 148.9, 148.5, 136.5, 124.8, 121.9, 121.3, 118.5, 111.2, 107.1, 103.5, 60.0, 56.3, 56.2, 42.5, 28.8, 14.7; HRMS (ESI) Calcd for C<sub>17</sub>H<sub>20</sub>NO<sub>4</sub> [M + H]<sup>+</sup> 302.1392, found 302.1403.

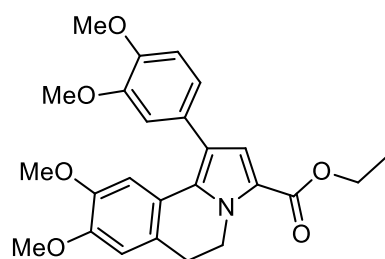

**Ethyl 1-(3,4-dimethoxyphenyl)-8,9-dimethoxy-5,6-dihydropyrrolo[2,1-*a*]isoquinoline-3-carboxylate (**3ahp**):**<sup>10</sup> Pale yellow solid (48% yield, eluent = hexane/EtOAc (95:5)); Mp = 148-149 °C; <sup>1</sup>H NMR (400 MHz, CDCl<sub>3</sub>) δ 7.02-6.98 (m, 3H), 6.91-6.89 (m, 2H), 6.73 (s, 1H), 4.62 (t, *J* = 6.6 Hz, 2H), 4.32 (q, *J* = 7.1 Hz, 2H), 3.91 (s, 3H), 3.89 (s, 3H), 3.84 (s, 3H), 3.44 (s, 3H), 3.03 (t, *J* = 6.5 Hz, 2H), 1.37 (t, *J* = 7.1 Hz, 3H); <sup>13</sup>C NMR (100 MHz, CDCl<sub>3</sub>) δ 161.6, 149.0, 148.4, 148.2, 147.5, 131.7, 129.5, 126.1, 121.9, 121.7, 121.3, 120.7, 119.3, 112.9, 111.5, 111.0, 108.9, 60.1, 56.2, 56.1, 56.1, 55.7, 42.7, 29.3, 14.7; HRMS (ESI) Calcd for C<sub>25</sub>H<sub>28</sub>NO<sub>6</sub> [M + H]<sup>+</sup> 438.1917, found 438.1918.

## References

---

- (1) (a) Mrcic, N.; Panella, L.; Minnaard, A. J.; Feringa, B. L.; de Vries, J. G. *J. Am. Chem.*
- (2) (a) For **1a**, **1h**, Samec, J. S. M.; Ell, A. H.; Bäckvall, J.-E. *Chem. Eur. J.* **2005**, *11*, 2327. (b) For **1b**, **1c**, **1k**, **1p**, Moessner, C.; Bolm, C. *Angew. Chem. Int. Ed.* **2005**, *44*, 7564. (c) For **1d**, Triforiová, A.; Diesen, J. S.; Chapman, C. J.; Andersson, P. G. *Org. Lett.* **2004**, *6*, 3825. (d) For **1e**, **1f**, **1g**, Yoshikai, N.; Matsumoto, A.; Norinder, J.; Nakamura, E. *Angew. Chem. Int. Ed.* **2009**, *48*, 2925. (e) For **1i**, Gautier, F.-M.; Jones, S.; Martin, S. J. *Org. Biomol. Chem.* **2009**, *7*, 229. (f) For **1l**, **1m**, **1n**, **1ae**, Malkov, A. V.; Vrankova, K.; Stoncius, S.; Kocovsky, P. *J. Org. Chem.* **2009**, *74*, 5839. (g) For **1o**, Dong, J.; Lee, P.-S.; Yoshikai, N. *Chem. Lett.* **2013**, *42*, 1140. (h) For **1q**, **1r**, Wei, Y.; Deb, I.; Yoshikai, N. *J. Am. Chem. Soc.* **2012**, *134*, 9098. (i) For **1s**, Kayukova, L. A.; Erzhanov, K. B.; Umarova, Z. N. *Zh. Org. Khim.* **1988**, *24*, 127. (j) For **1u**, Imamoto, T.; Iwadate, N.; Yoshida, K. *Org. Lett.* **2006**, *8*, 2289. (k) For **1v**, Samec, J. S. M.; Bäckvall, J.-E. *Chem. Eur. J.* **2002**, *8*, 2955. (l) For **1w**, **1x**, Han, Z.; Wang, Z.; Zhang, X.; Ding, K. *Angew. Chem. Int. Ed.* **2009**, *48*, 5345. (m) For **1y**, Vachal, P.; Jacobsen, E. N. *Org. Lett.* **2000**, *2*, 867. (n) For **1z**, Dalili, S.; Yudin, A. K. *Org. Lett.* **2005**, *7*, 1161. (o) For **1af**, Stauffer, S. R.; Sun, J.; Katzenellenbogen, B. S.; Katzenellenbogen, J. A. *Bioorg. Med. Chem.* **2000**, *8*, 1293.
- (3) Malkov, A. V.; Vrankova, K.; Stoncius, S.; Kocovsky, P. *Chem. Eur. J.* **2008**, *14*, 8082.
- (4) (a) For **1aa**, Rathelot, P.; Vanelle, P.; Gasquet, M.; Delmas, F.; Crozet, M. P.; Timon-David, P.; Maldonado, J. *Eur. J. Med. Chem.* **1995**, *30*, 503. (b) For **1ab**, Martin, N. H.; Jefford, C. W. *Helv. Chim. Acta.* **1982**, *65*, 762. (c) For **1ad**, Reeves, J. T.; Tan, Z.; Han, Z. S.; Li, G.; Zhang, Y.; Xu, Y.; Reeves, D. C.; Gonnella, N. C.; Ma, S.; Lee, H.; Lu, B. Z.; Senanayake, C. H. *Angew. Chem. Int. Ed.* **2012**, *51*, 1400. (d) For **1ad**, corresponding aldehyde (1.3 equiv) and *p*-anisidine (1.0 equiv) was added and stirred in toluene for 1 hour at room temperature, and then subjected to standard reaction conditions in one pot with **2b**. (e) For **1ag**, Bremner, J. B.; Coban, B.; Griffith, R.; Groenewoud, K. M.; Yates, B. F. *Bioorg. Med. Chem.* **2000**, *8*, 201. (f) For **1ah**, Wu, J.; Talwar, D.; Johnston, S.; Yan, M.; Xiao, J. *Angew. Chem. Int. Ed.* **2013**, *52*, 6983.
- (5) (a) For **2b**, **2f**, Davies, J. R.; Kane, P. D.; Moody, C. J. *Tetrahedron* **2004**, *60*, 3967. (b) For **2d**, **2e**, **2i**, **2n**, Jiang, Y.; Khong, V. Z. Y.; Lourdasamy, E.; Park, C.-M. *Chem. Commun.* **2012**, *48*, 3133. (c) For **2g**, Erhunmwunse, M. O.; Steel, P. G. *J. Org.*

- 
- Chem.* **2008**, *73*, 8675. (d) For **2h**, Peng, C.; Cheng, J.; Wang, J. *J. Am. Chem. Soc.* **2007**, *129*, 8708. (e) For **2m**, Phun, L. H.; Patil, D. V.; Cavitt, M. A.; France, S. *Org. Lett.* **2011**, *13*, 1952. (f) For **2o**, Honey, M. A.; Pasceri, R.; Lewis, W.; Moody, C. J. *J. Org. Chem.* **2012**, *77*, 1396. (g) For **2p**, Linder, J.; Garner, T. P.; Williams, H. E. L.; Searle, M. S.; Moody, C. J. *J. Am. Chem. Soc.* **2011**, *133*, 1044. (h) For **2q**, Sharpe, R. J.; Malinowski, J. T.; Johnson, J. S. *J. Am. Chem. Soc.* **2013**, *135*, 17990.
- (6) CCDC 1040843 contains the supplementary crystallographic data for this paper. These data can be obtained free of charge from The Cambridge Crystallographic Data Centre via [www.ccdc.cam.ac.uk/data\\_request/cif](http://www.ccdc.cam.ac.uk/data_request/cif).
- (7) Banwell, M. G.; Hamel, E.; Hockless, D. C. R.; Verdiner-Pinard, P.; Willis, A. C.; Wong, D. J. *Bioorg. Med. Chem.* **2006**, *14*, 4627.
- (8) Rostovskii, N. V.; Novikov, M. S.; Khlebnikov, A. F.; Khlebnikov, V. A.; Korneev, S. M. *Tetrahedron* **2013**, *69*, 4292.
- (9) CCDC 1063222 contains the supplementary crystallographic data for this paper. These data can be obtained free of charge from The Cambridge Crystallographic Data Centre via [www.ccdc.cam.ac.uk/data\\_request/cif](http://www.ccdc.cam.ac.uk/data_request/cif).
- (10) Handy, S. T.; Zhang, Y.; Bregman, H. *J. Org. Chem.* **2004**, *69*, 2362.



# $^1\text{H}$ and $^{13}\text{C}$ NMR Spectra

TWW-02-orthome-imine BBF01 CDCl<sub>3</sub>  $^1\text{H}$

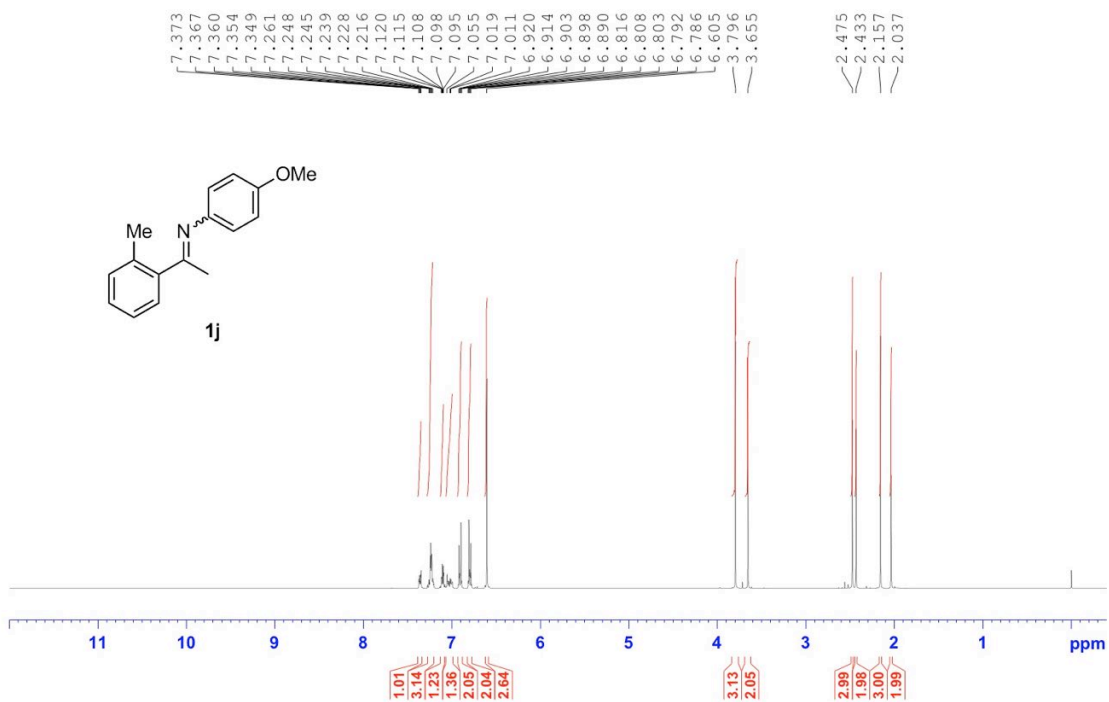

TWW-02-orthome-imine BBF01 CDCl<sub>3</sub>  $^{13}\text{C}$

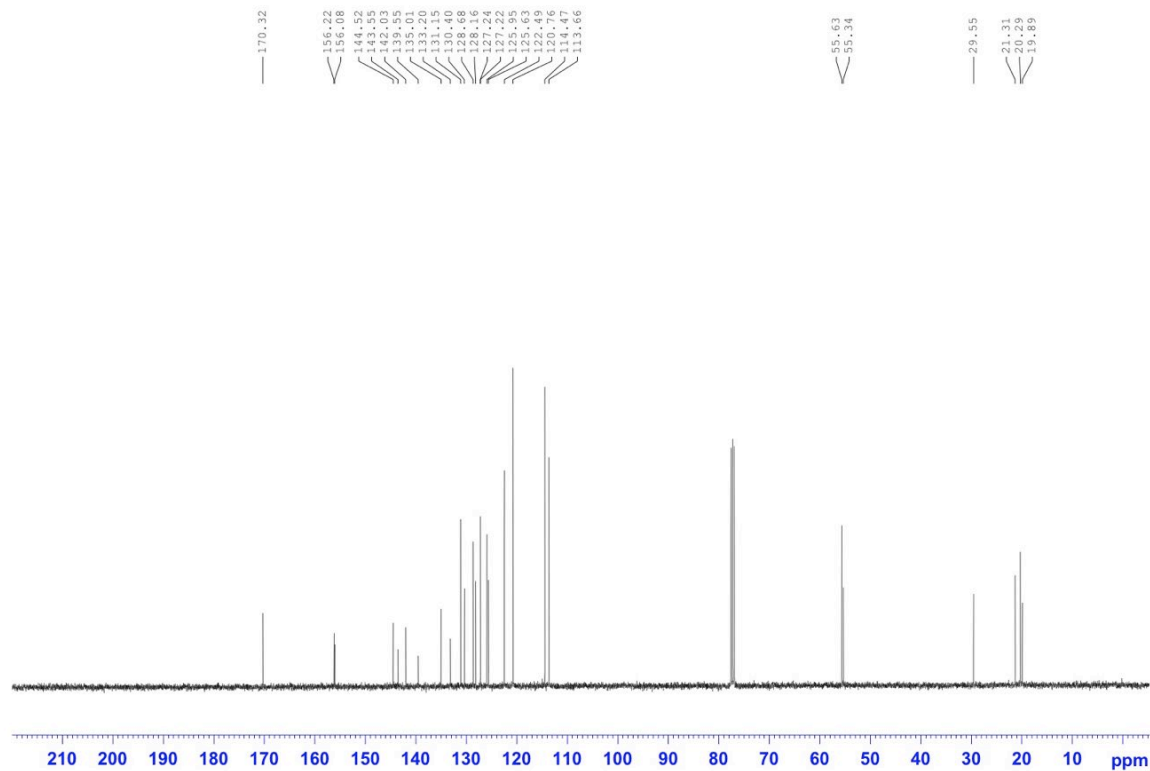

cyclohep-imine

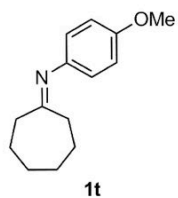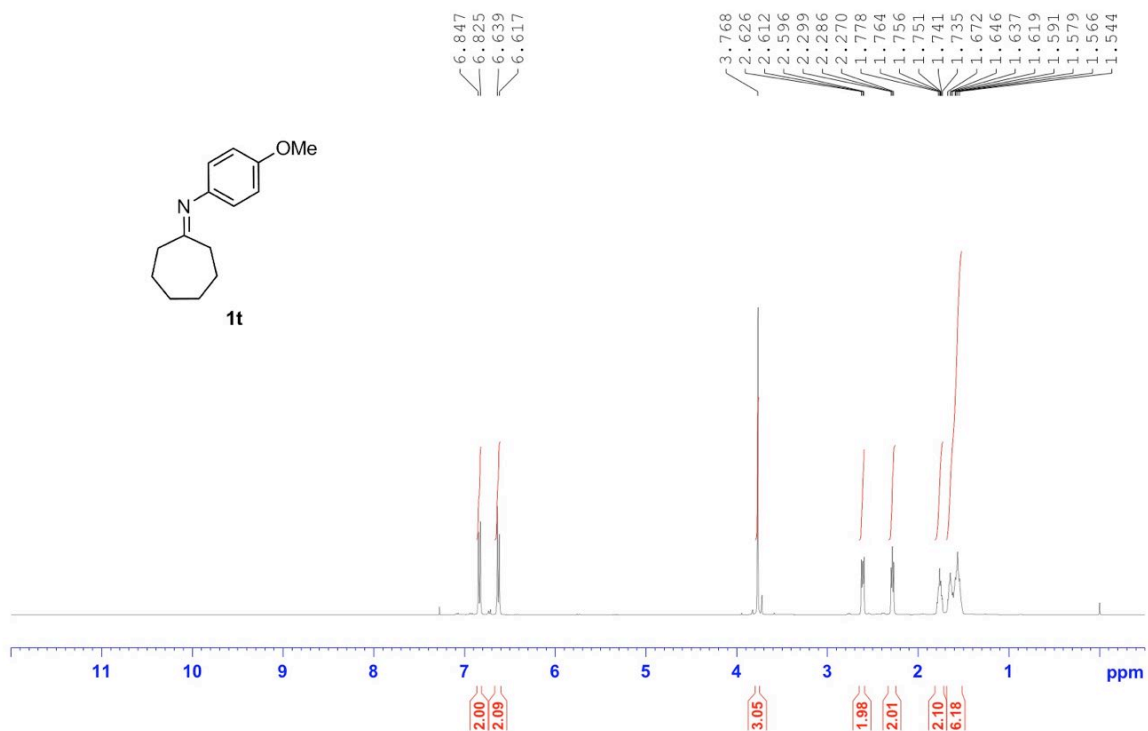

cyclohep-imine

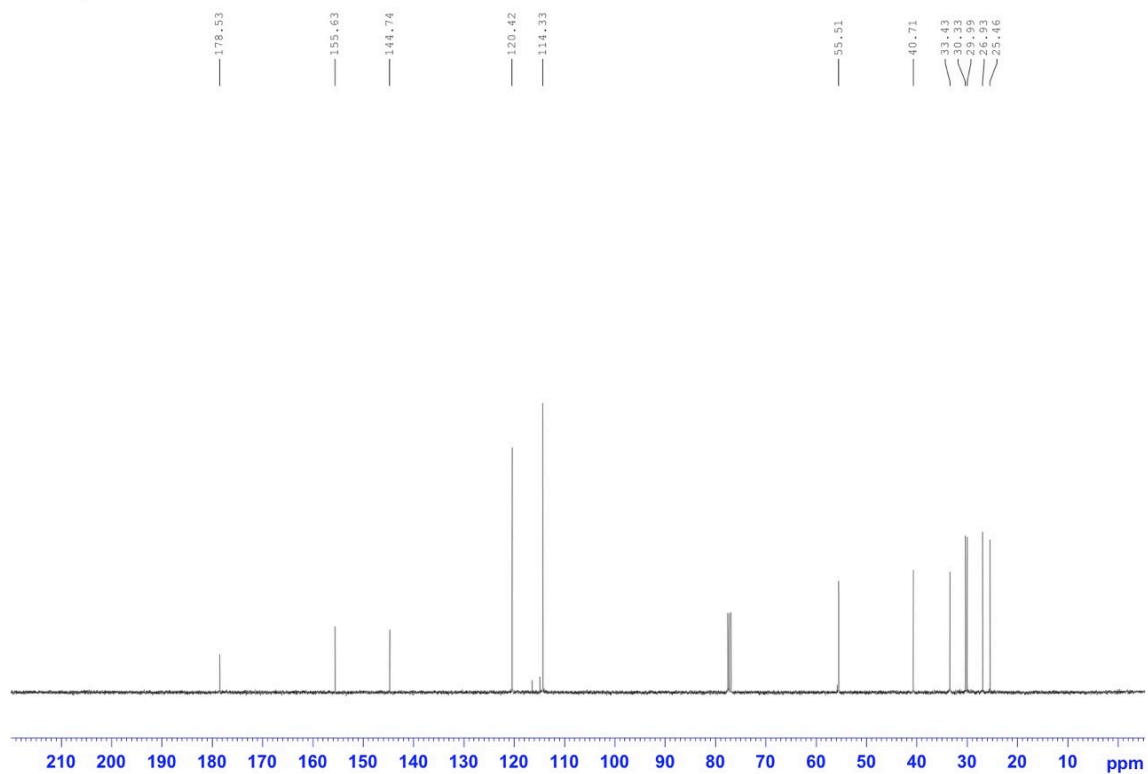

TWW-02-205, 1H, BBFO1, CDC13

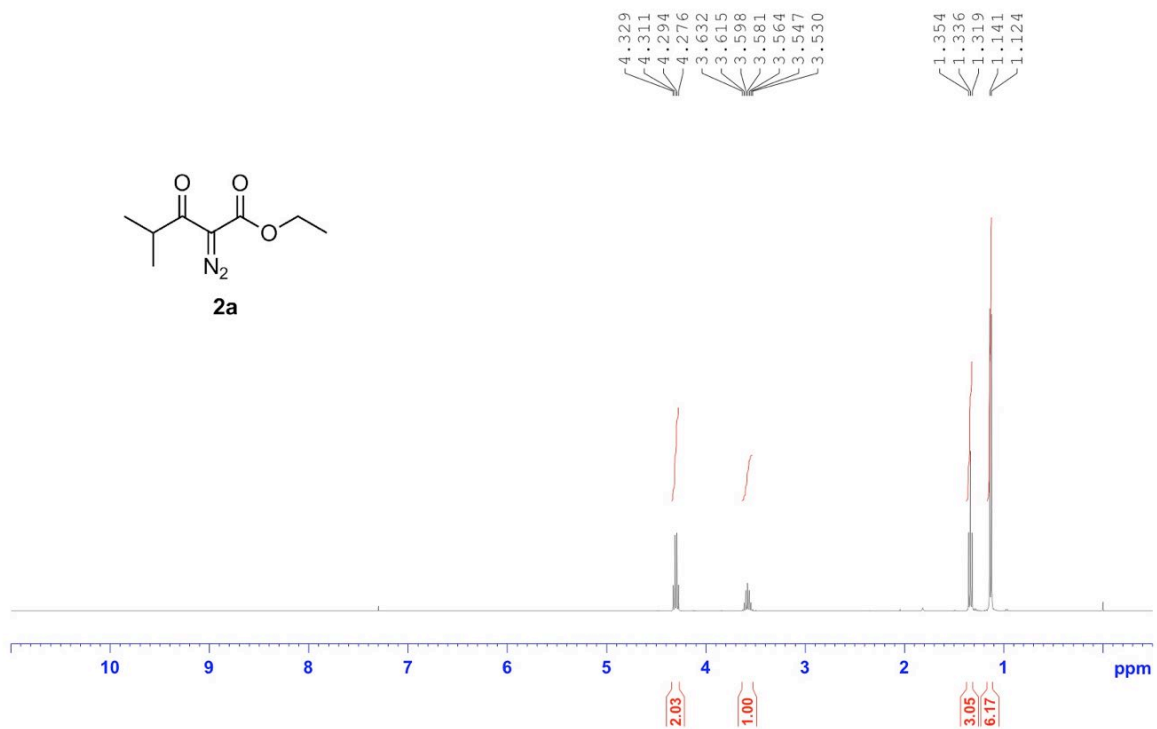

TWW-02-205x, 13C, BBFO1, CDC13

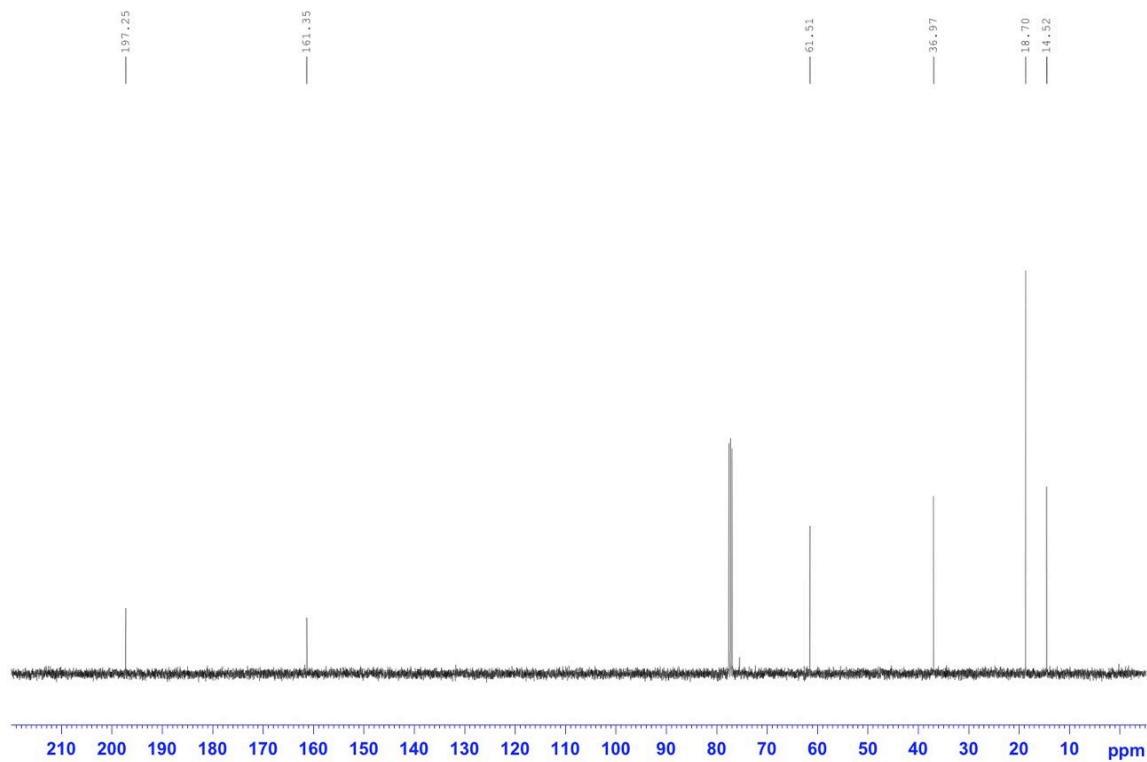

TWW-02-191, 1H BBF01, CDC13

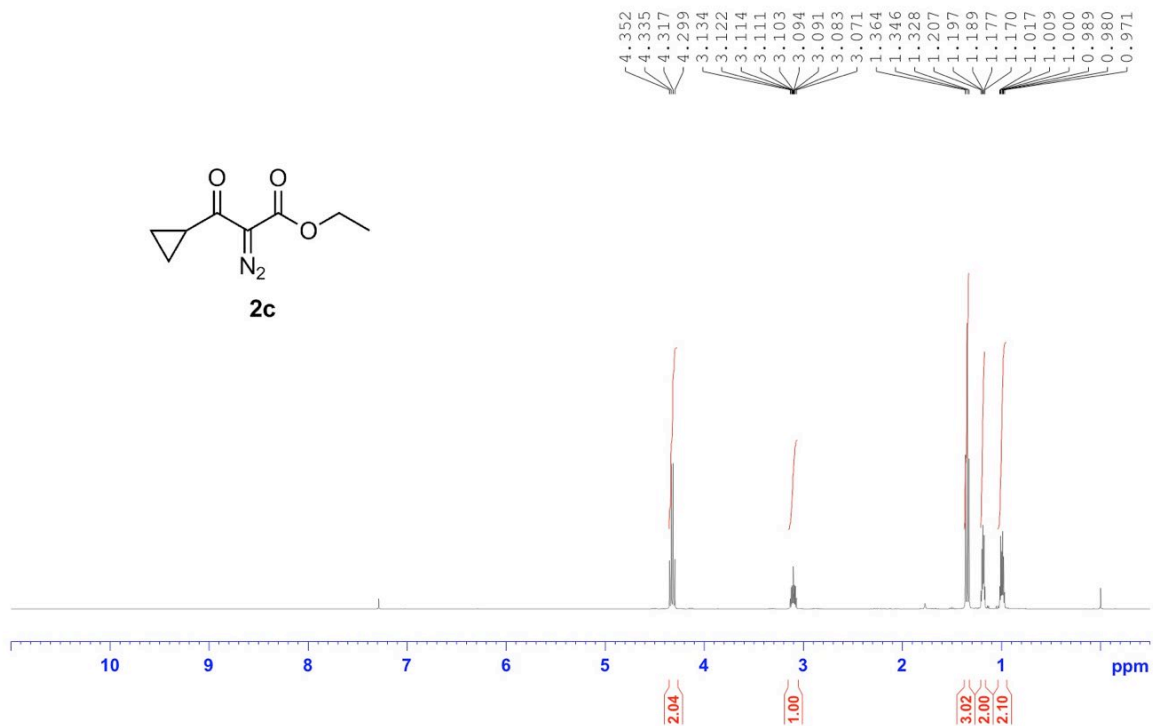

TWW-02-191x, <sup>13</sup>C, BBF01, CDC13

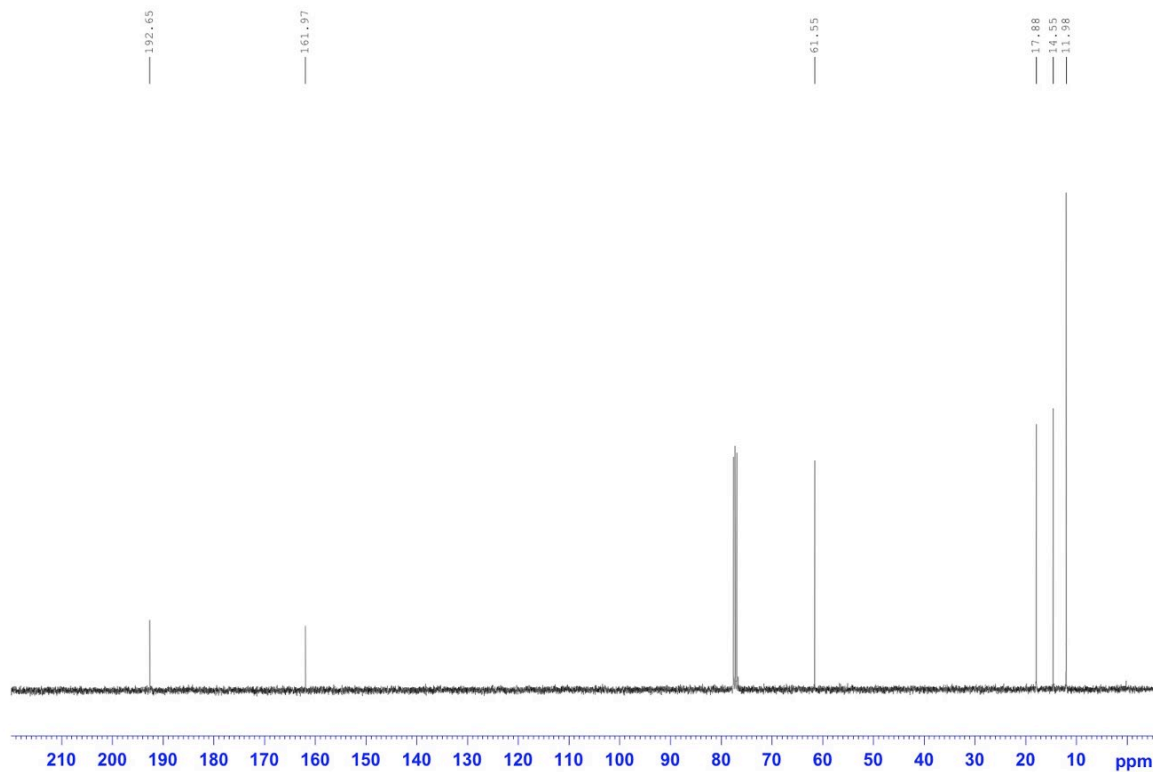

TWW-02-192, 1H BBF01, CDC13

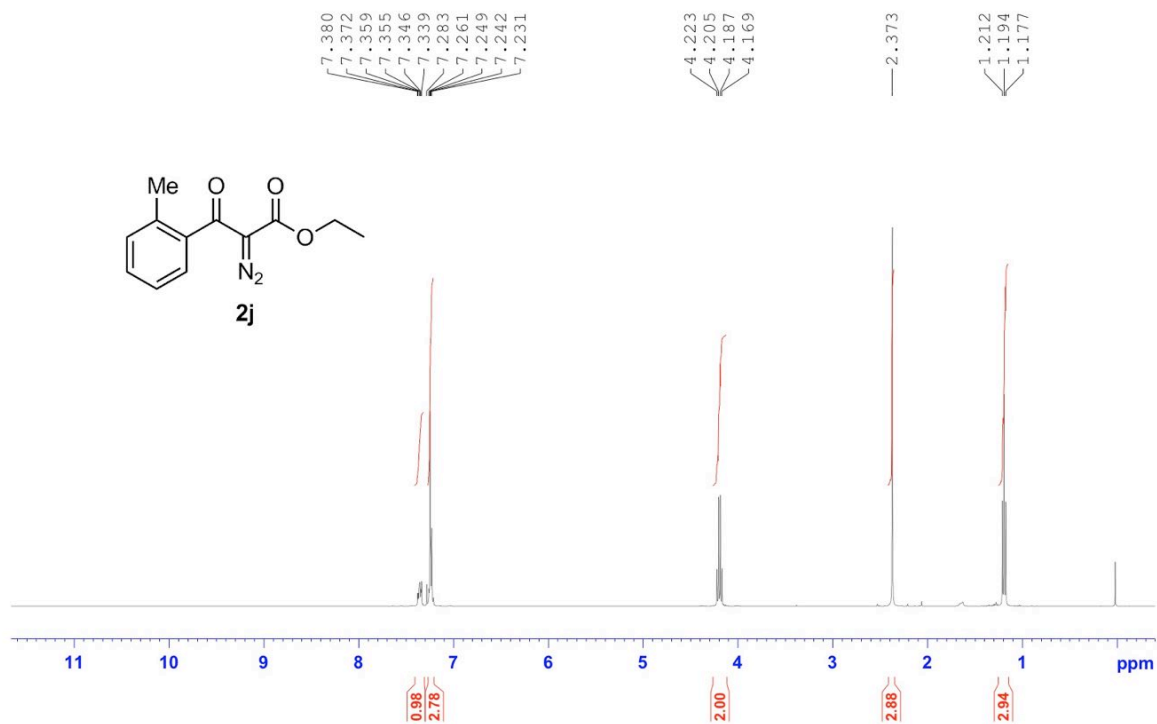

TWW-02-192, 13C BBF01, CDC13

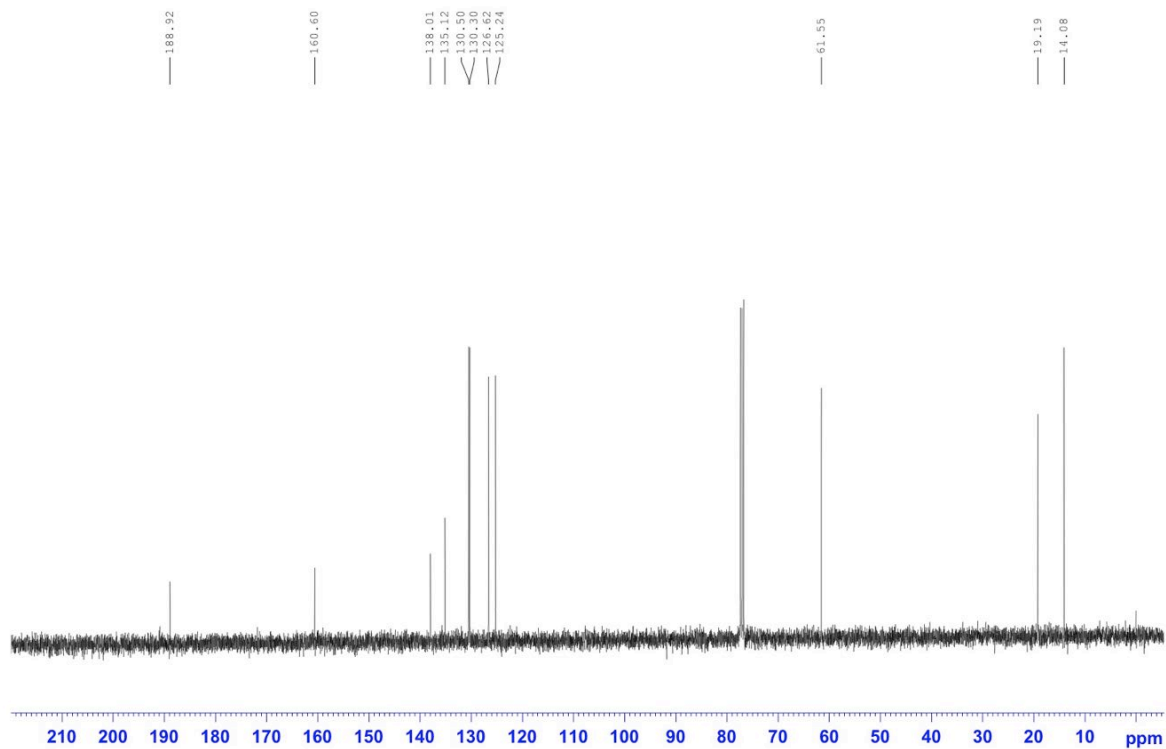

TWW-02-206, 1H, BBF01, CDCl3

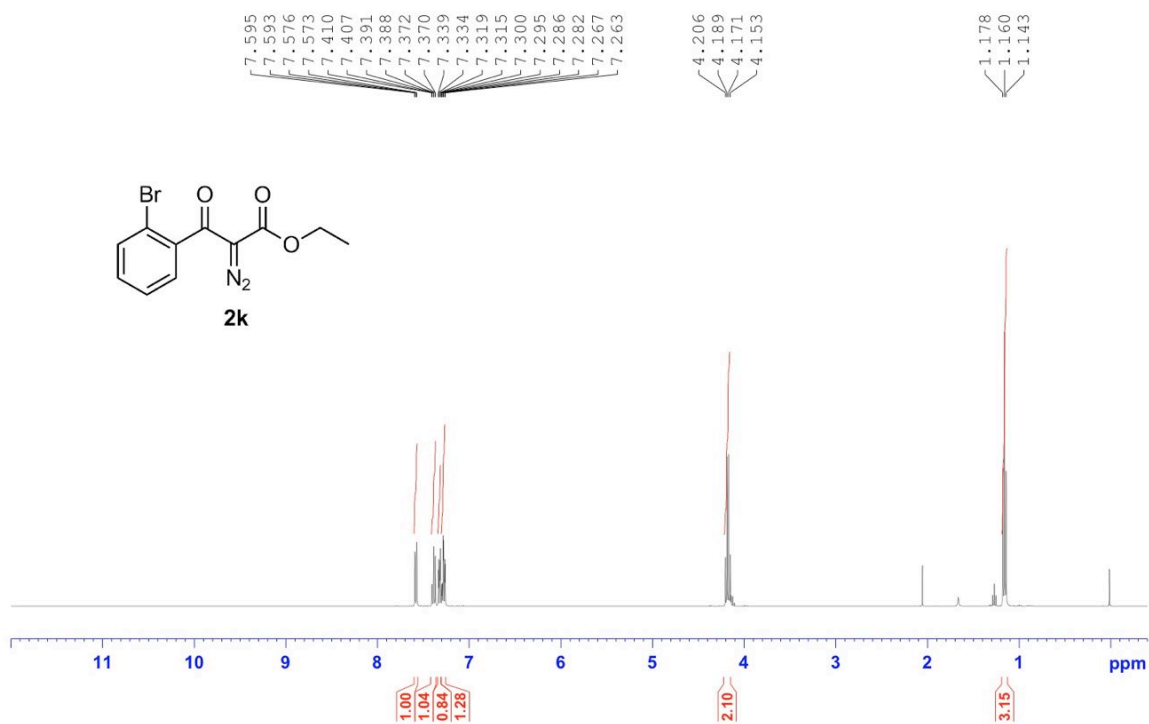

TWW-02-206, 13C, BBF01, CDCl3

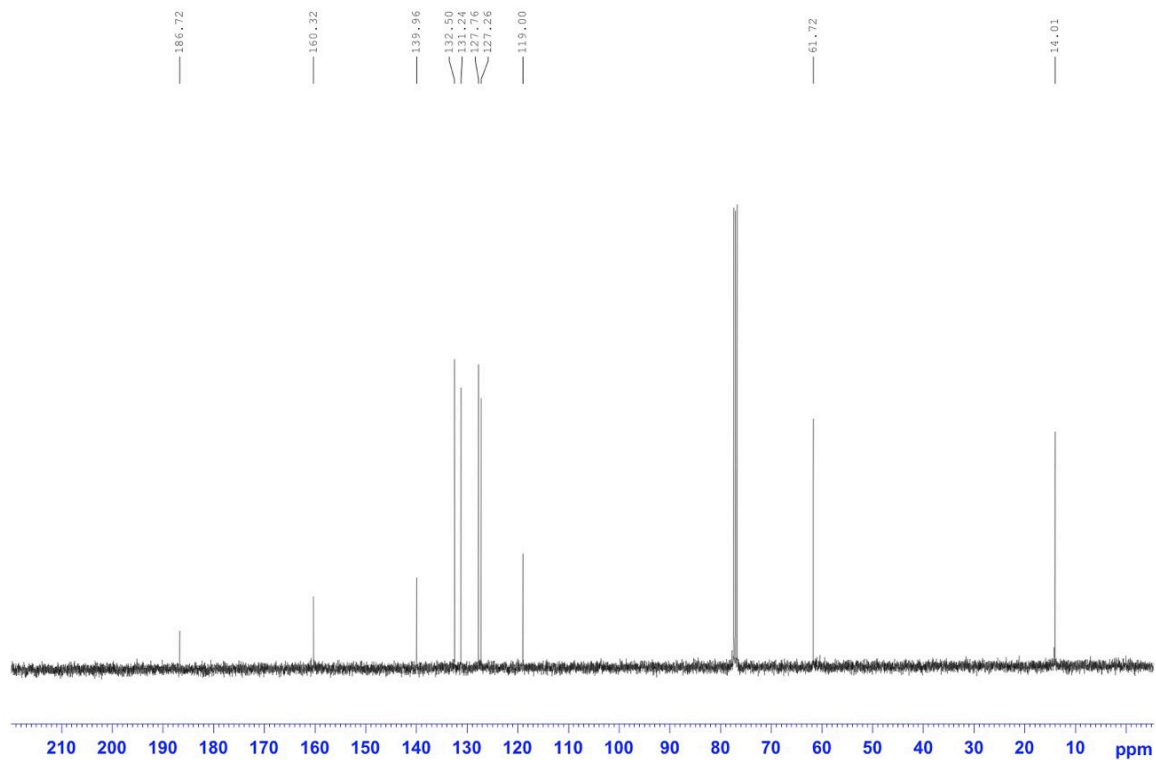

TWW-02-207, 1H, BBF01, CDCl3

8.092  
8.087  
8.069  
7.989  
7.968  
7.917  
7.909  
7.899  
7.894  
7.876  
7.573  
7.562  
7.558  
7.555  
7.551  
7.545  
7.538  
7.529  
7.510  
7.492

3.691

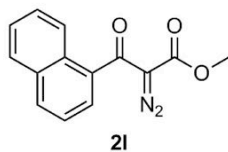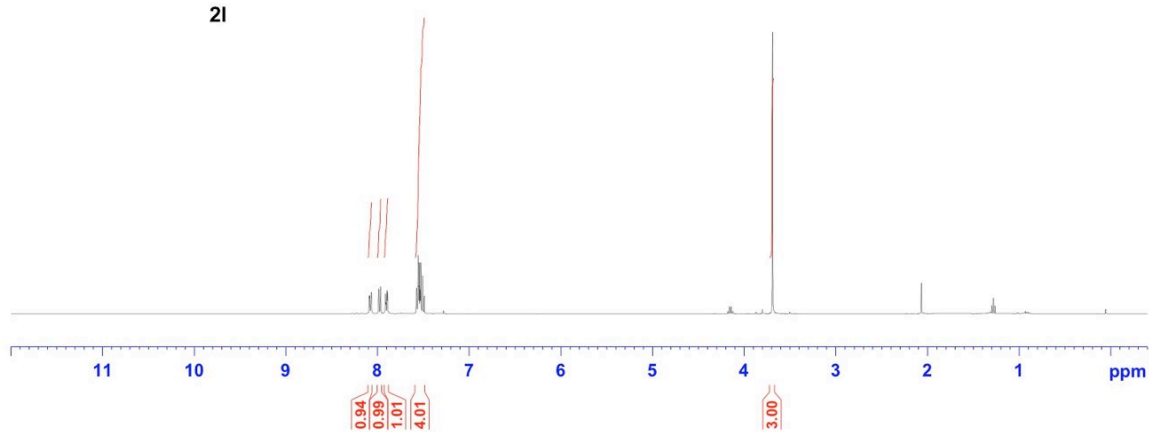

TWW-02-207, 13C, BBF01, CDCl3

187.72

160.94

135.16  
133.51  
131.32  
128.57  
127.35  
126.41  
125.76  
124.43

52.35

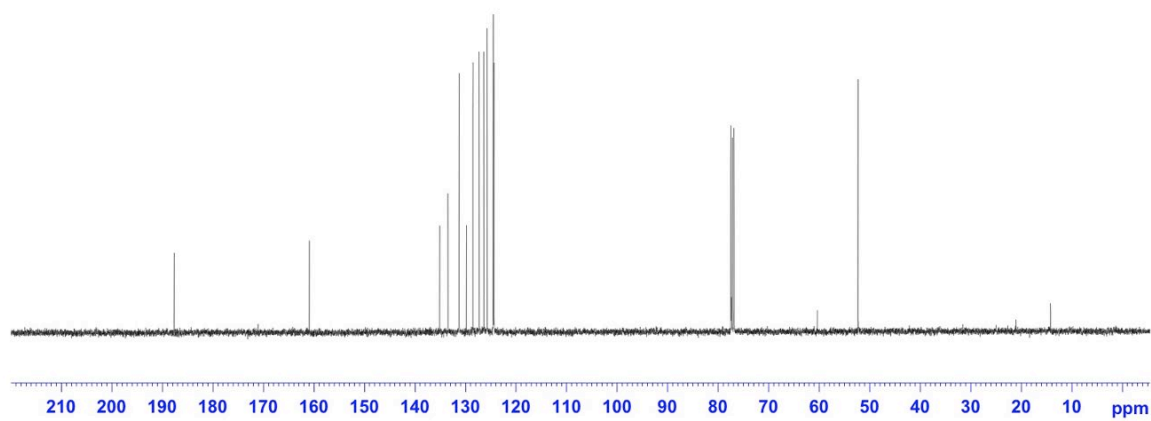

TWW-02-076, BBFO, 1H, CDC13

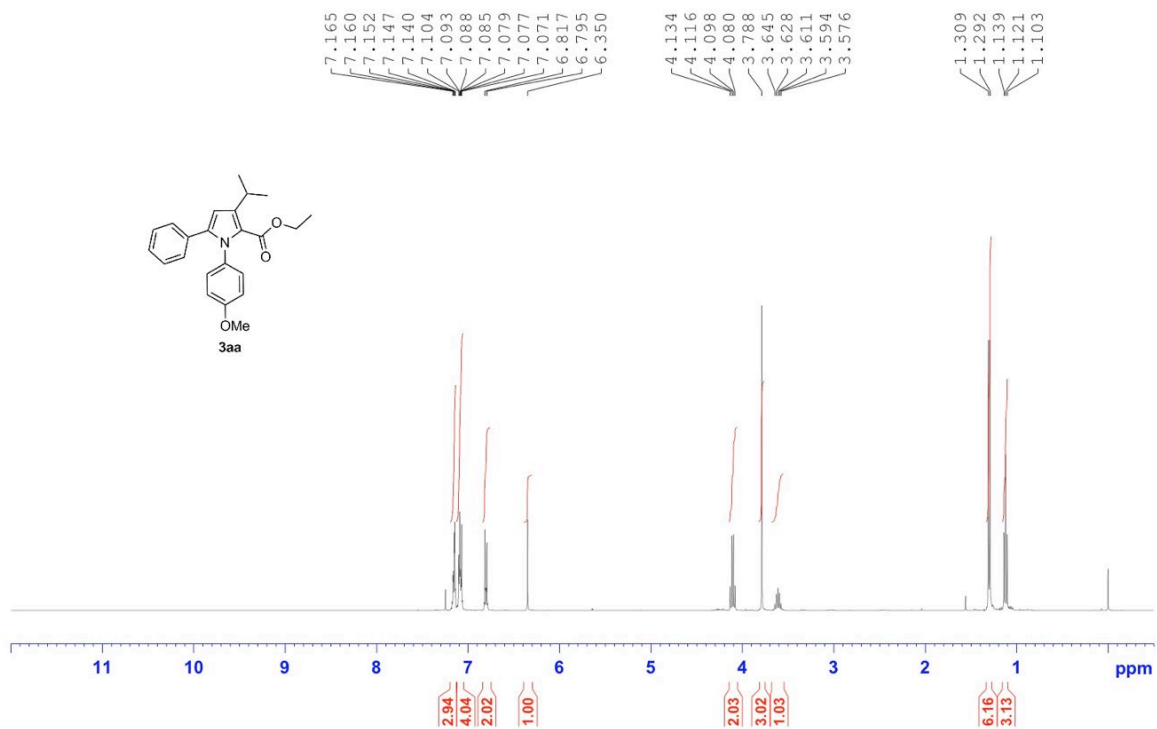

TWW-02-076, BBFO, 13C, CDC13

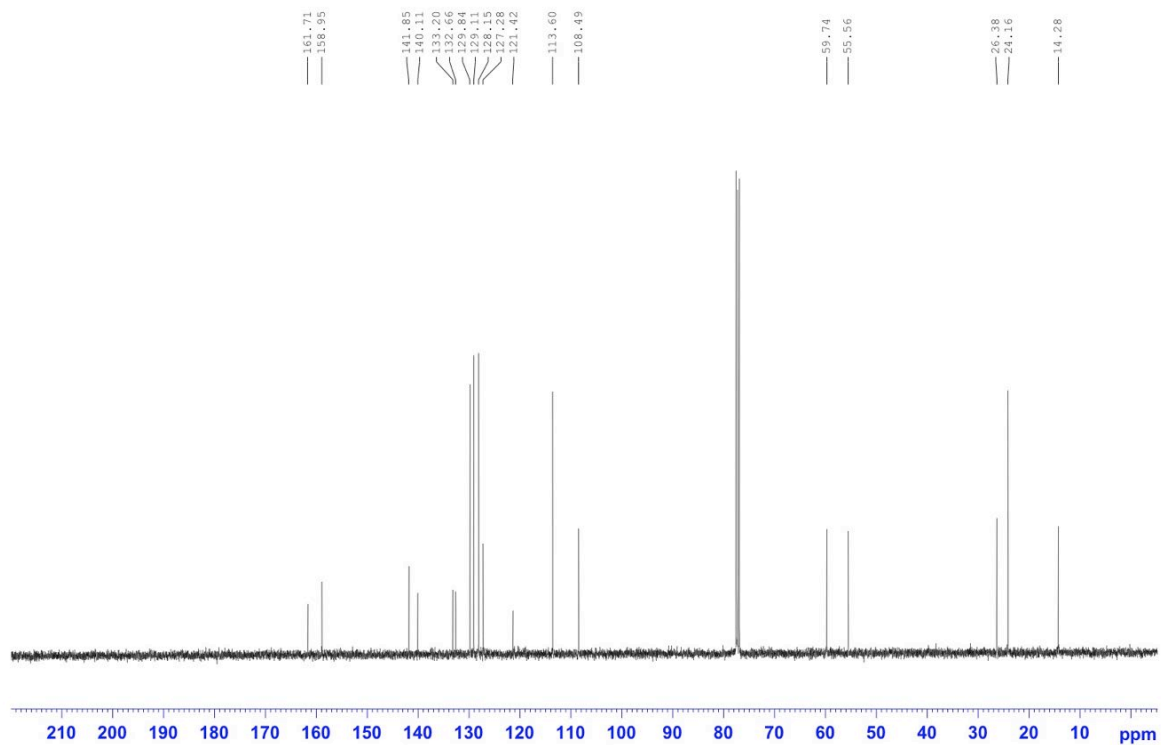



# 3aa-HMQC

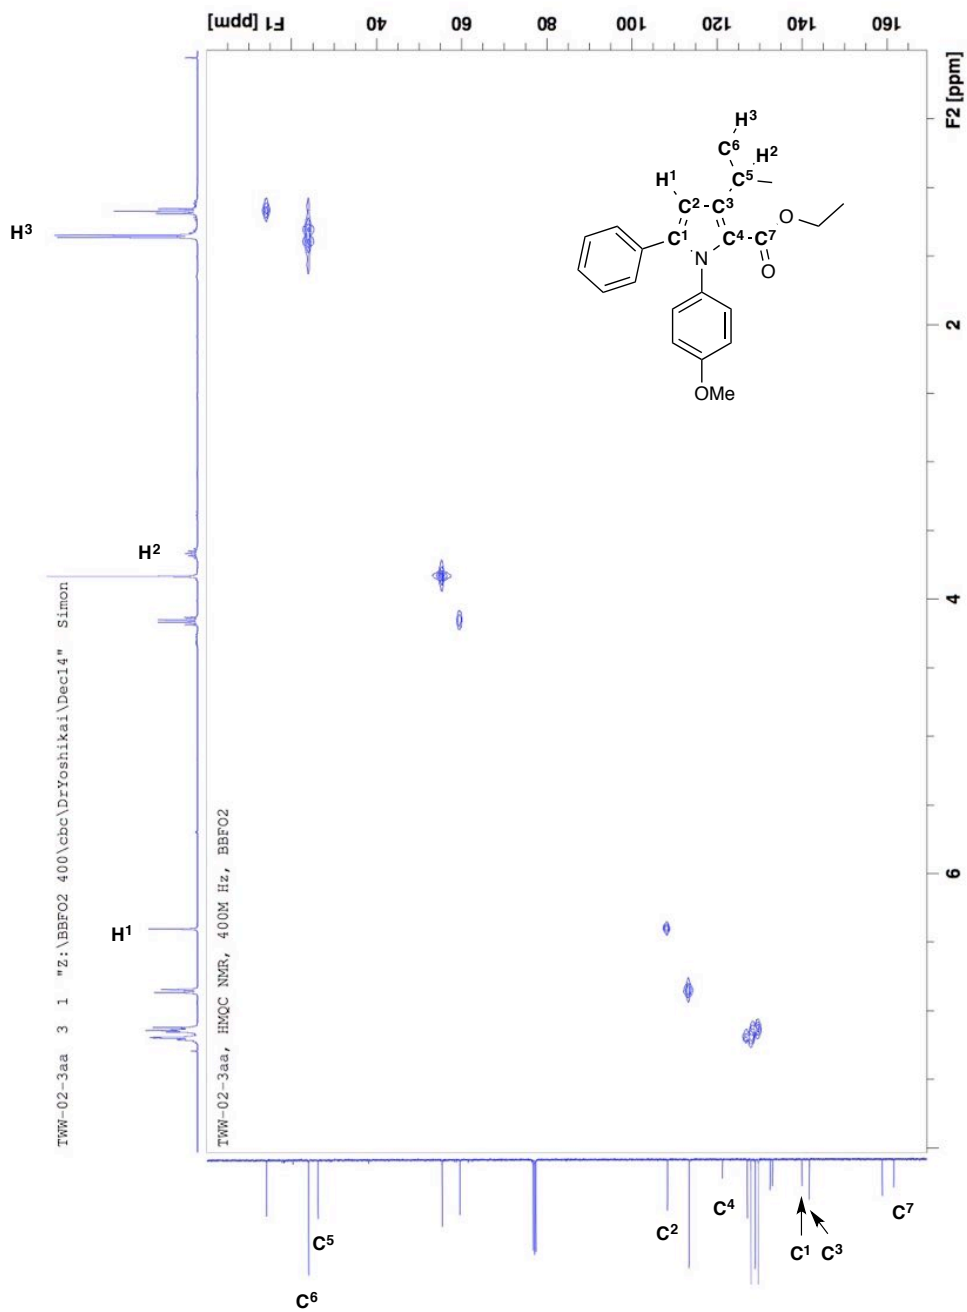

# 3aa-HMBC

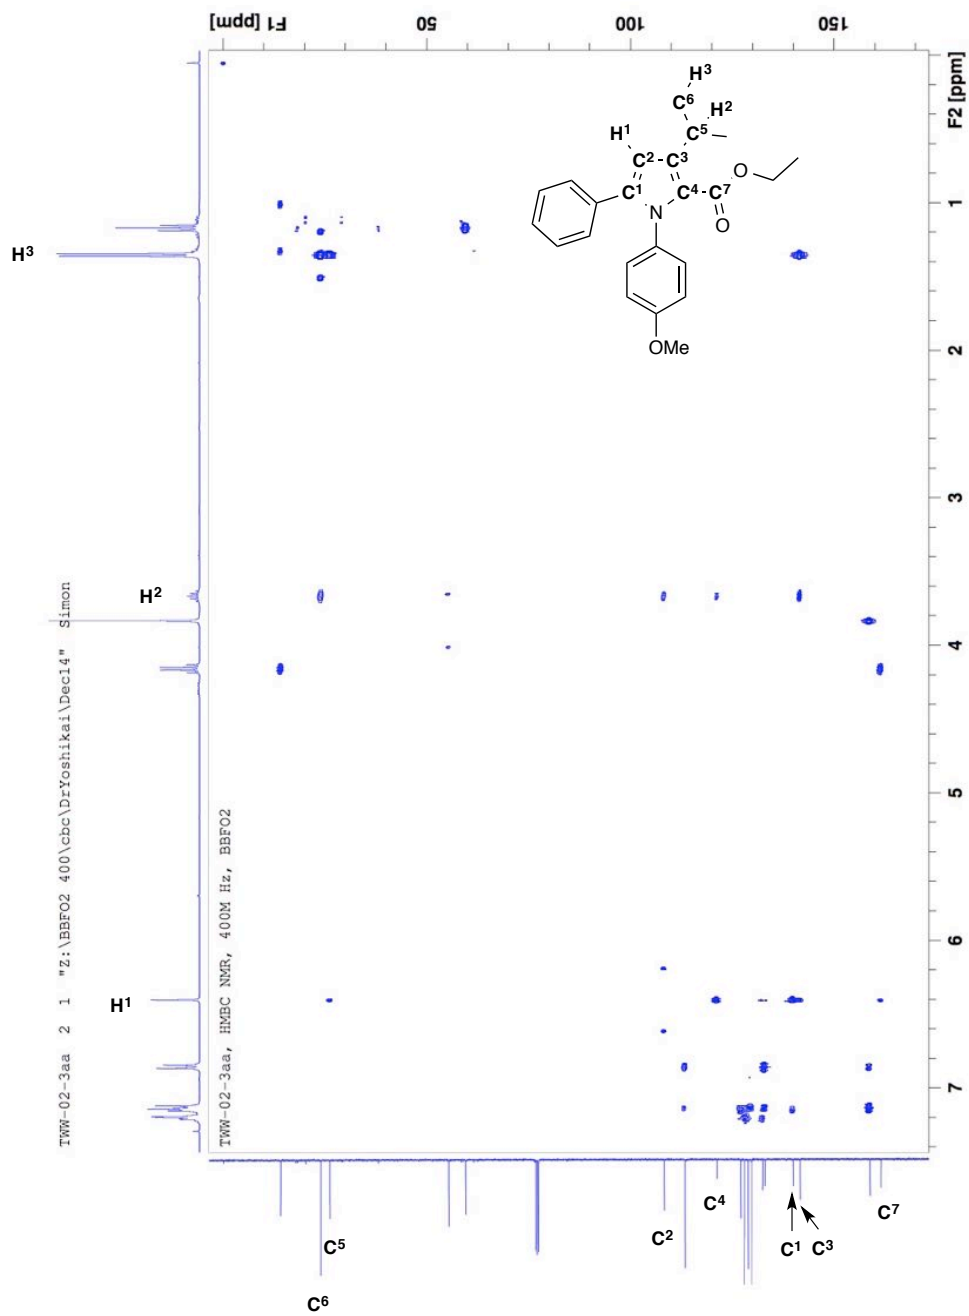

TWW-02-089, BBFO, 1H, CDC13

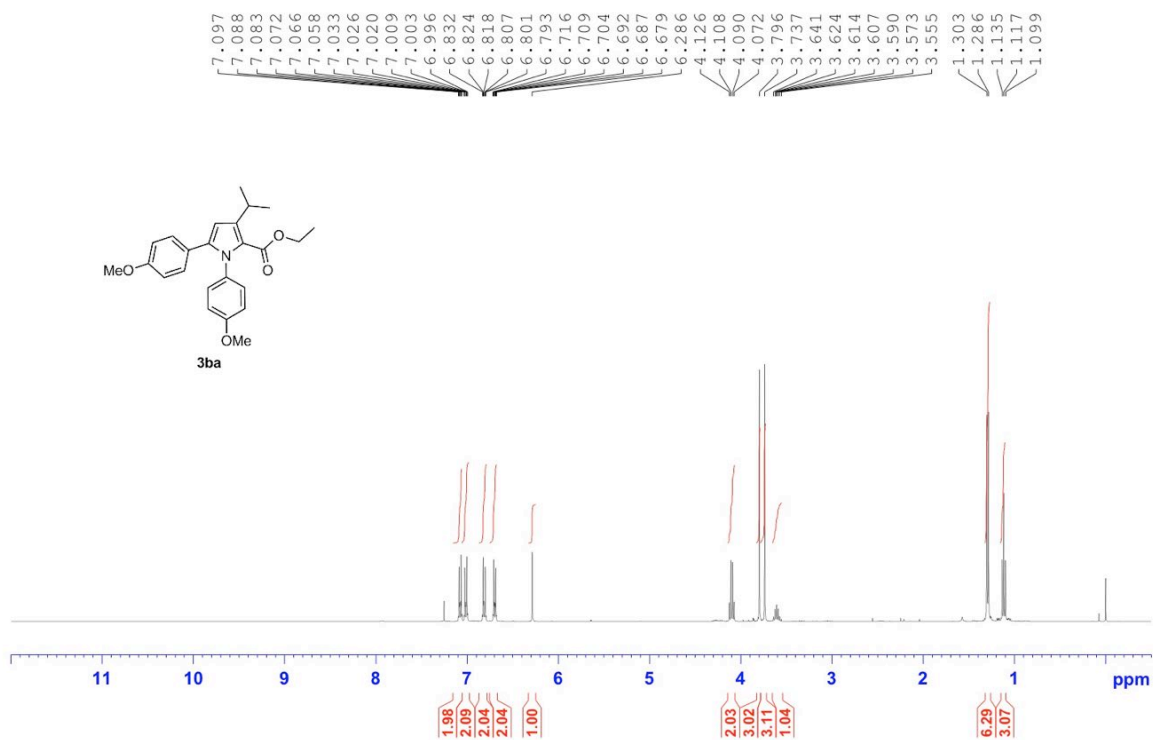

TWW-02-089, BBFO, 13C, CDC13

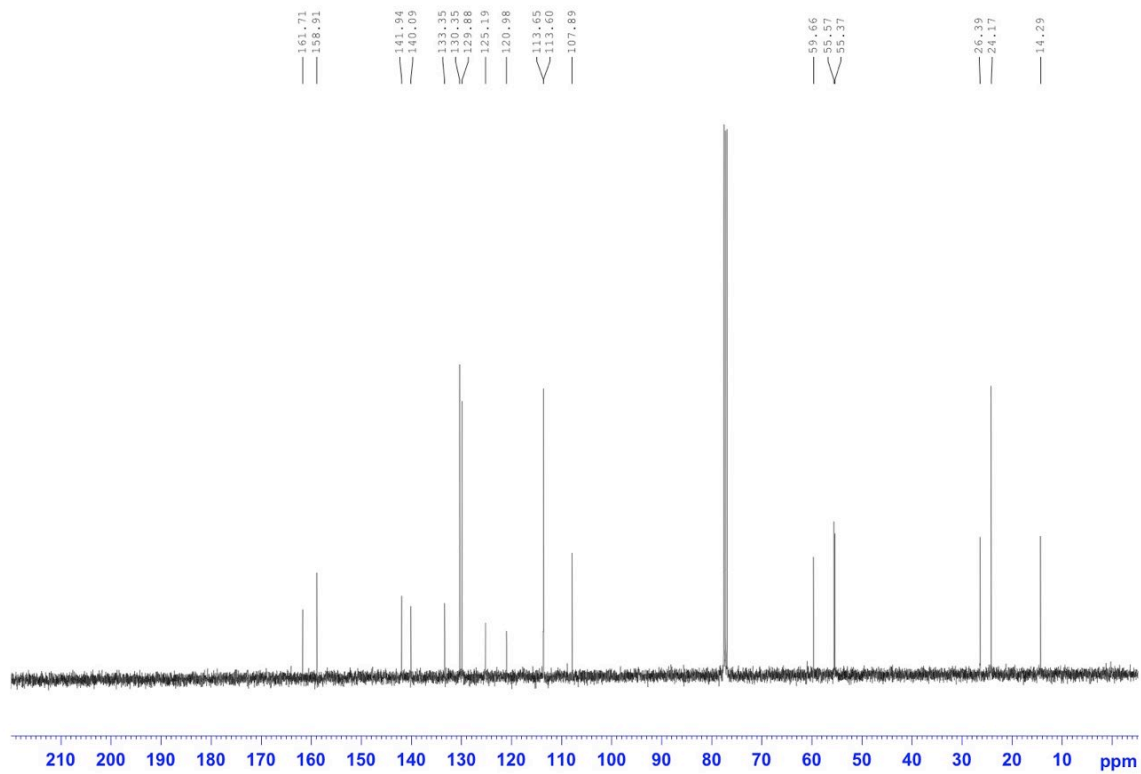

TWW-02-138 1H BBOF1 CDC13

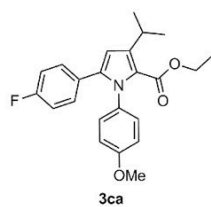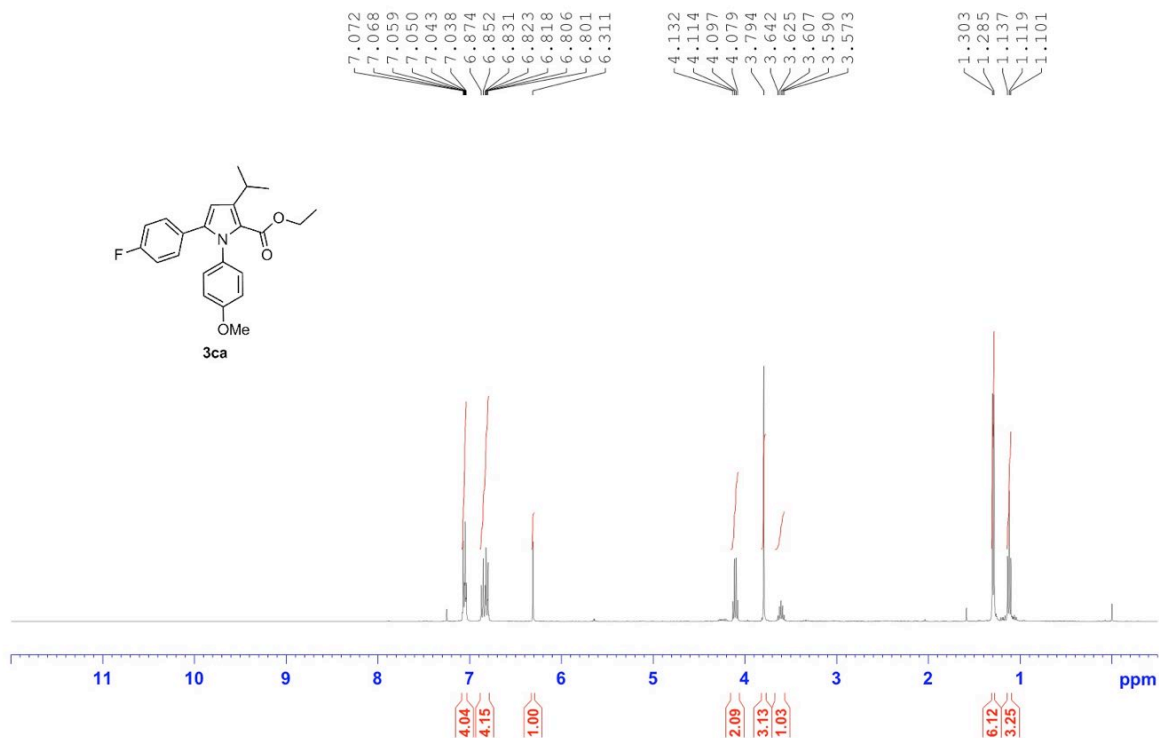

TWW-02-138 13C BBOF1 CDC13

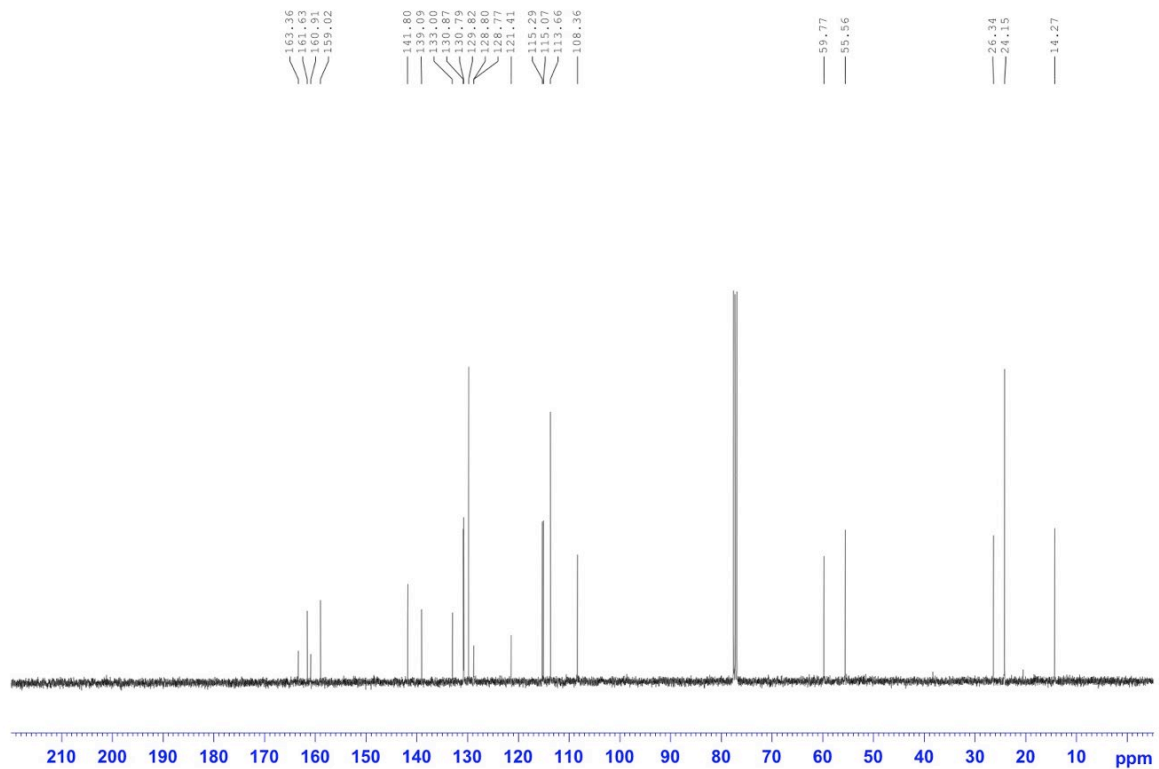

TWW-02-103, BBFO, 1H, CDC13

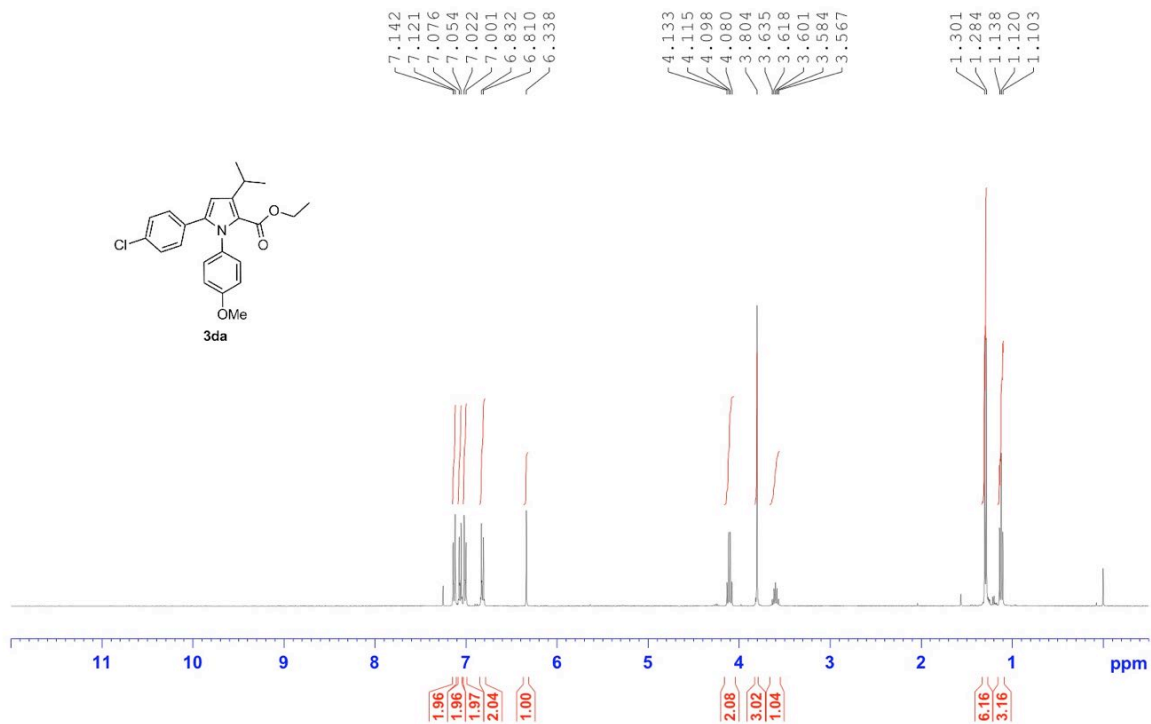

TWW-02-103, BBFO, 13C, CDC13

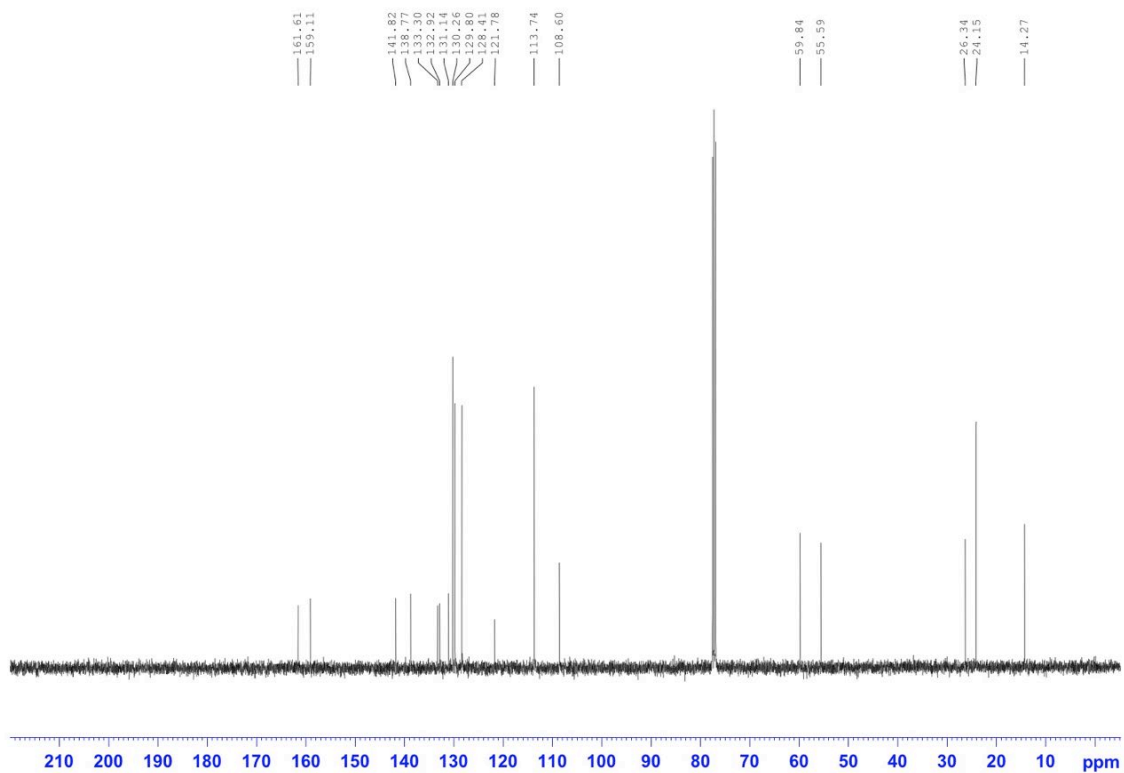

TWW-02-088, BBFO, 1H, CDC13

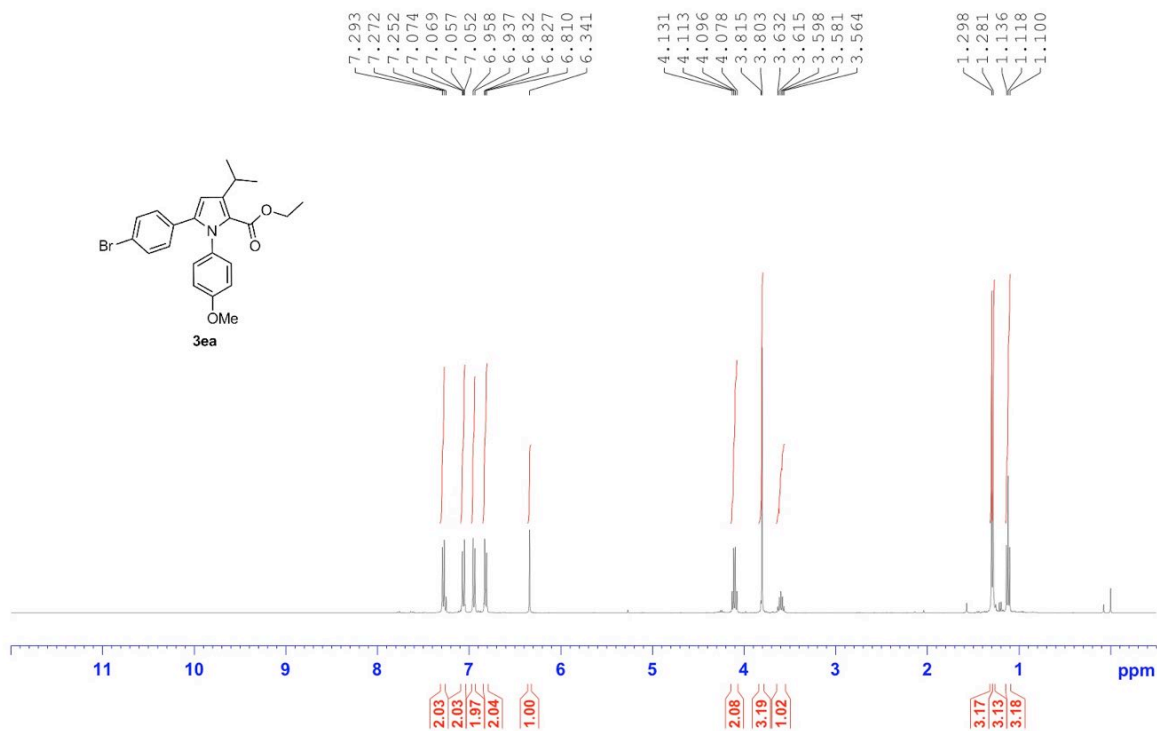

TWW-02-088, BBFO, 13C, CDC13

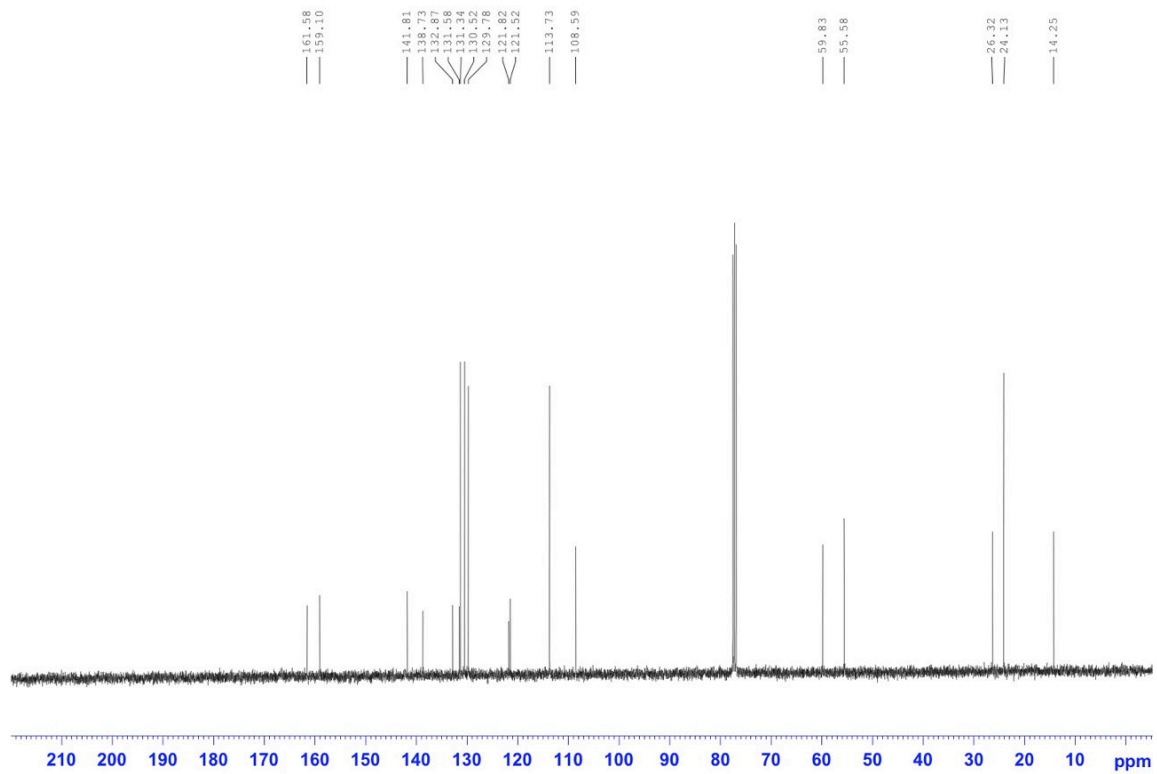

TWW-02-139 1H BBF01 CDC13

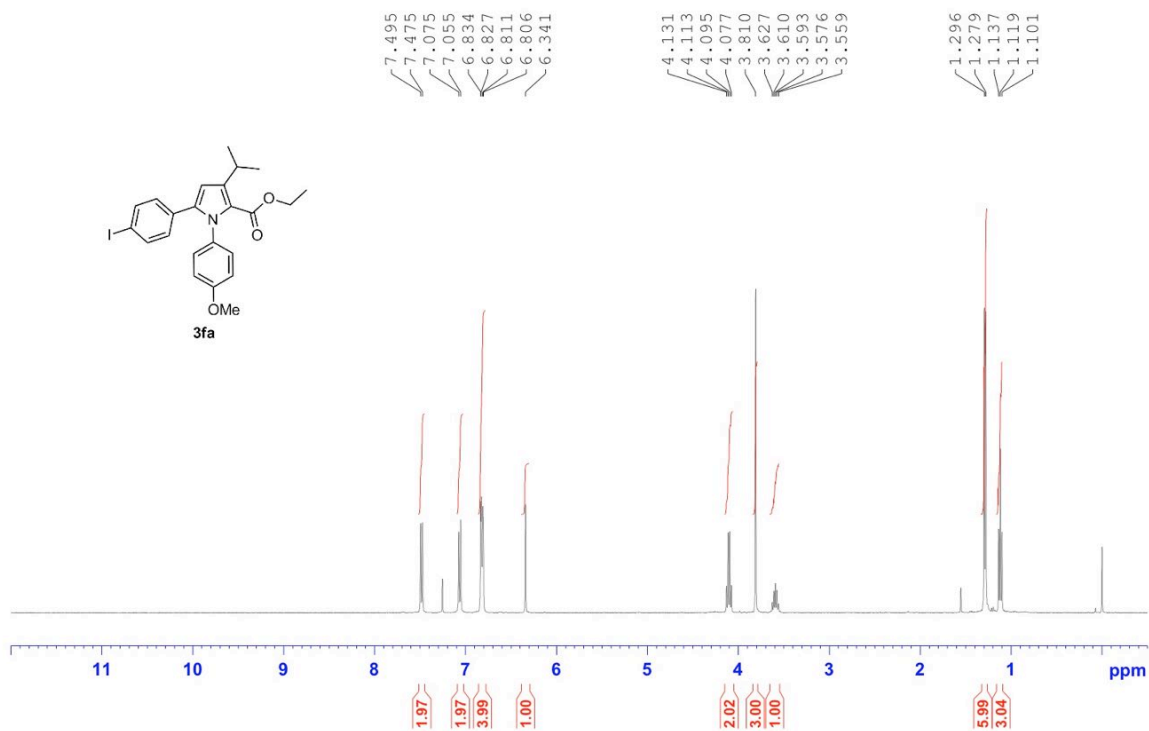

TWW-02-139 13C BBF01 CDC13

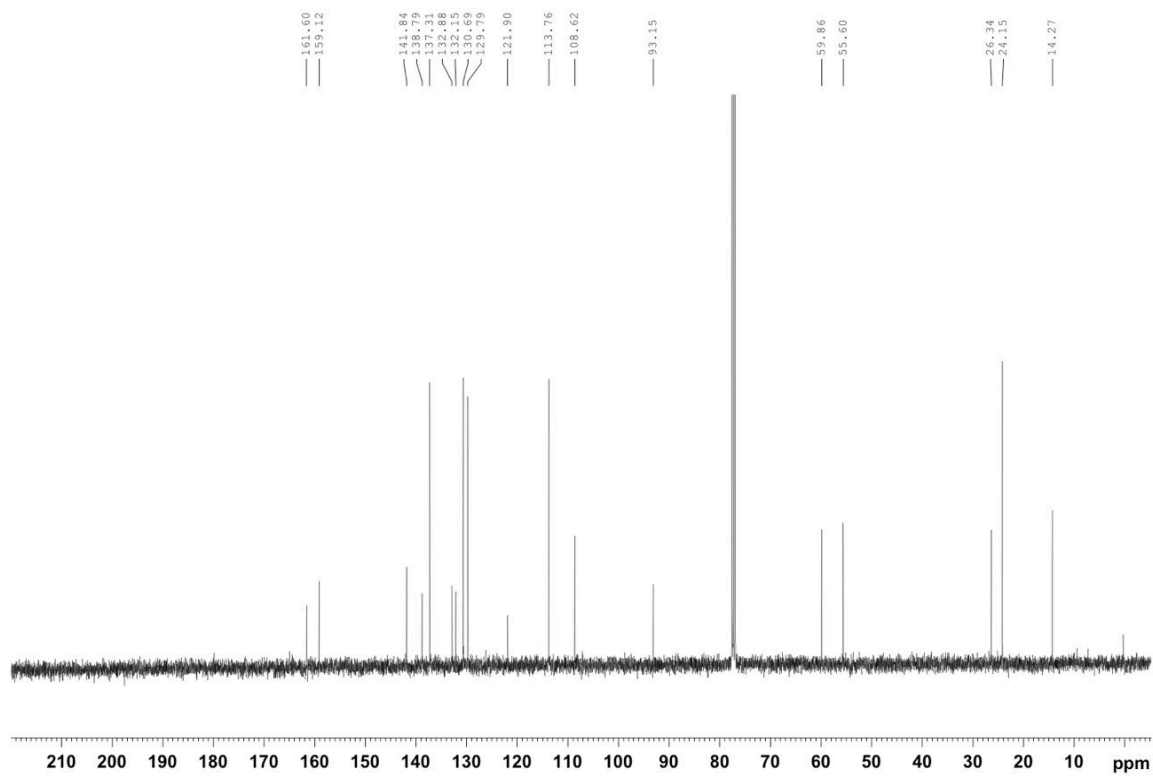

TWW-02-93-1 BBF01 CDC13 1H

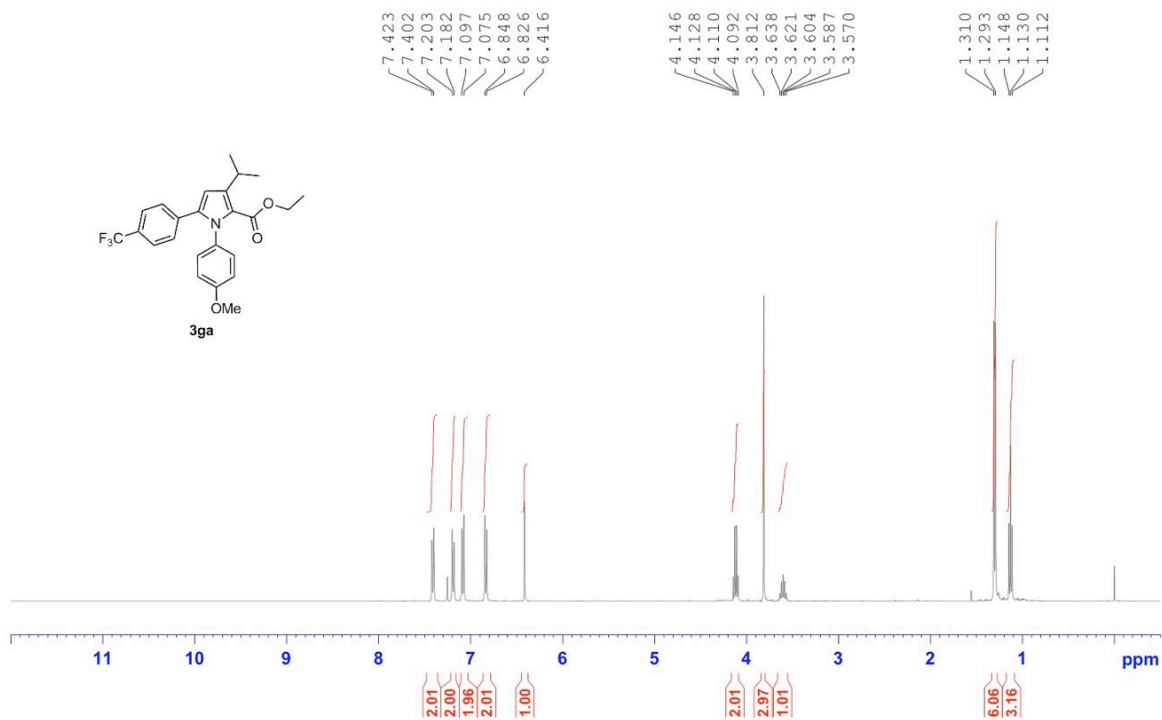

TWW-02-93-1 BBF01 CDC13 13C

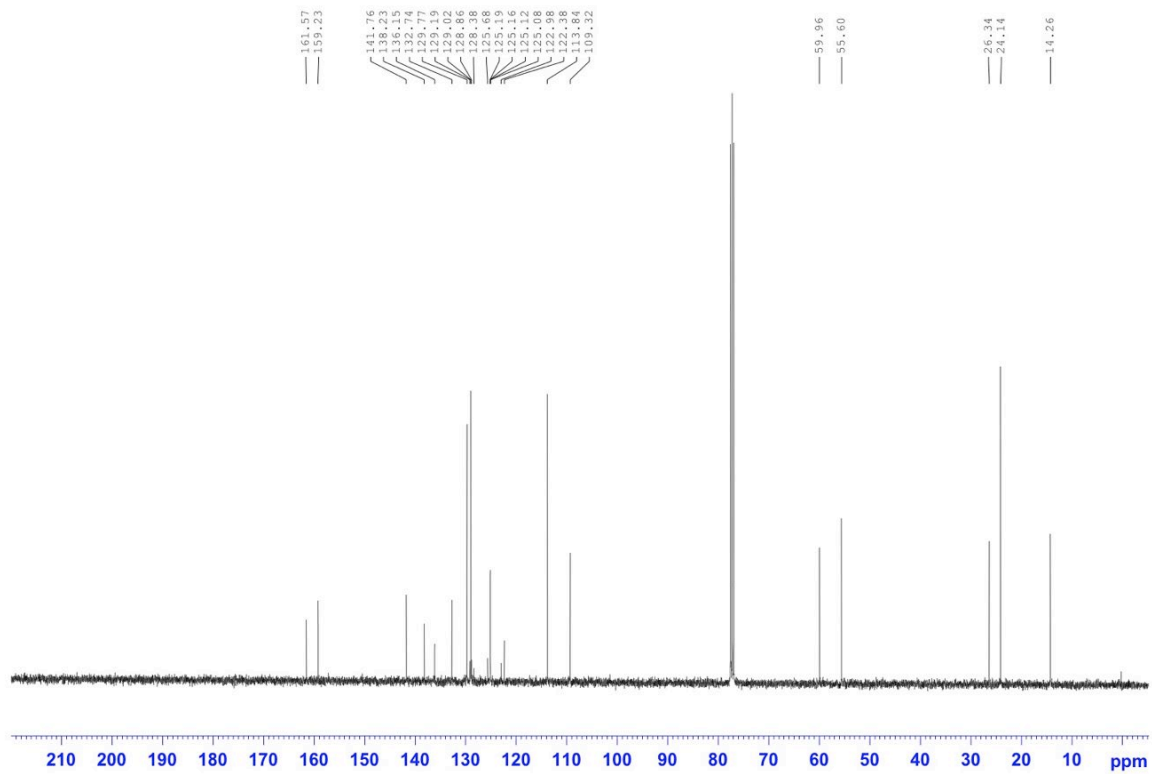



TWW-02-86-x BBF01 CDC13 1H

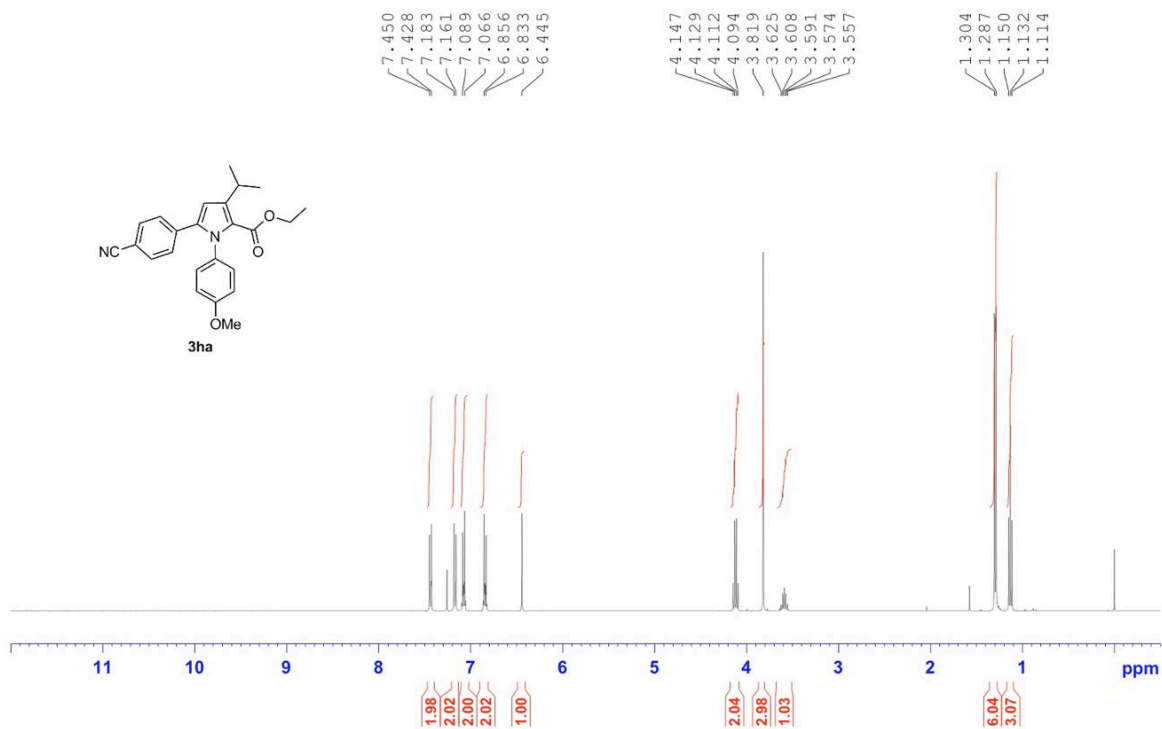

TWW-02-86-x BBF01 CDC13 13C

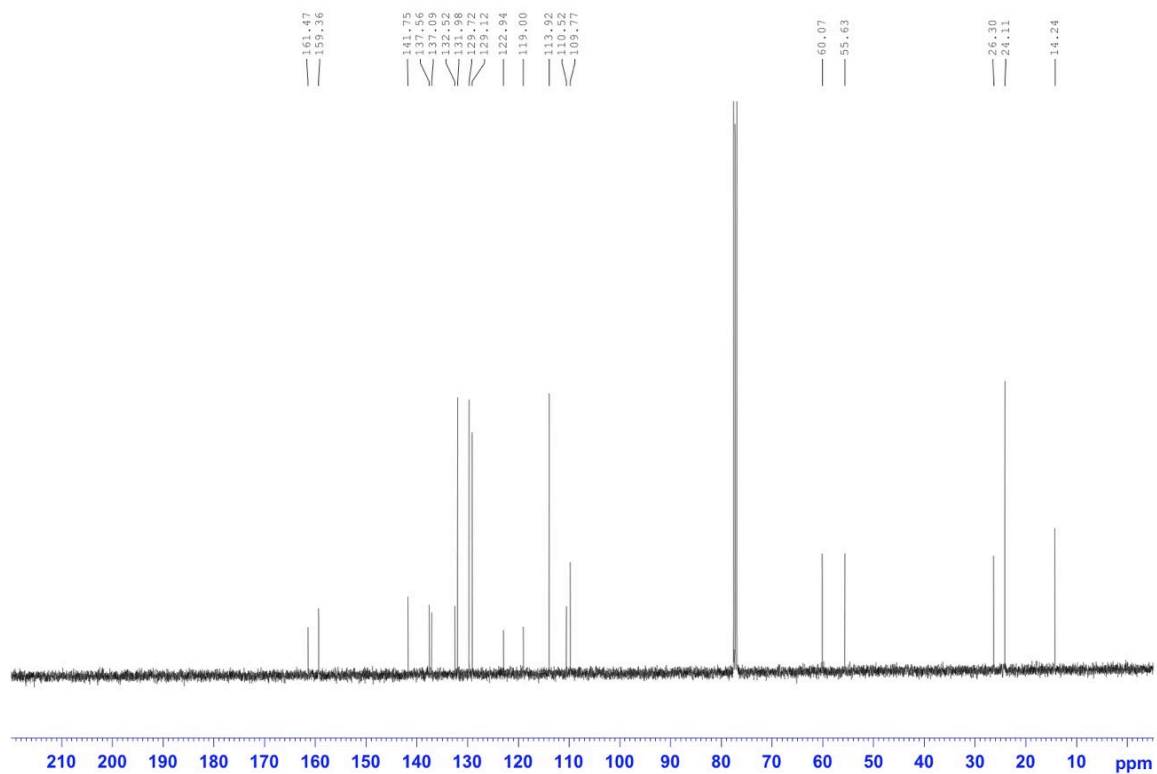

TWW-02-87-x BBF01 CDC13 1H

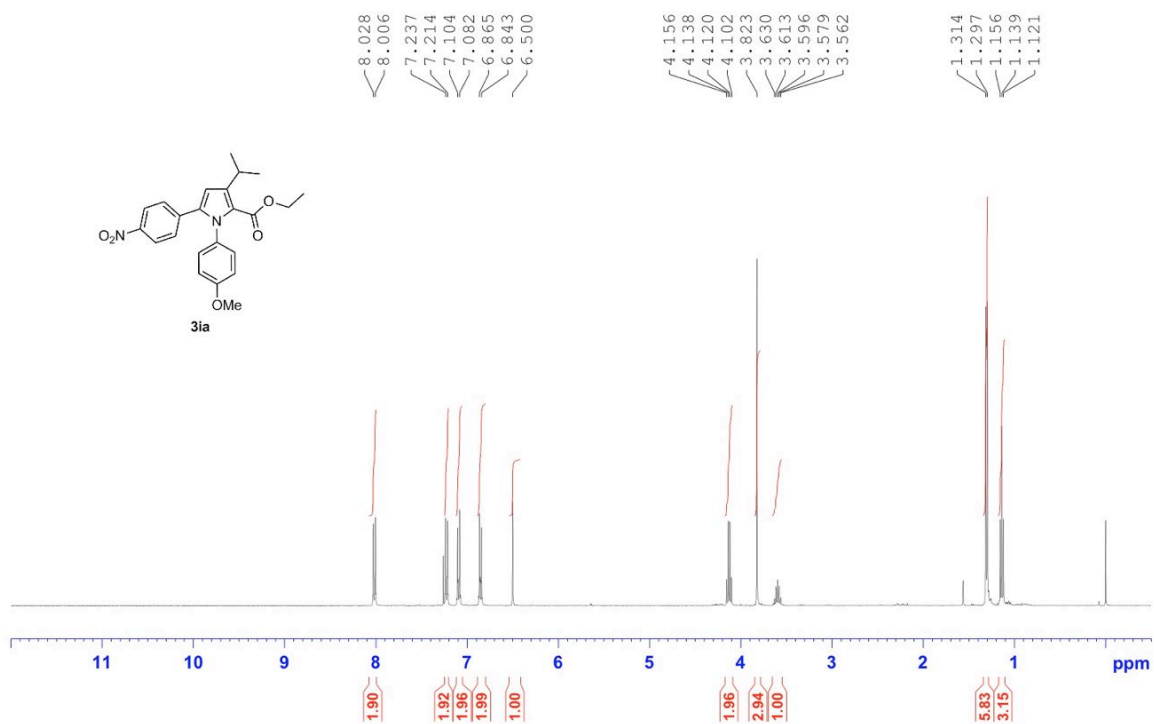

TWW-02-87-x BBF01 CDC13 13C

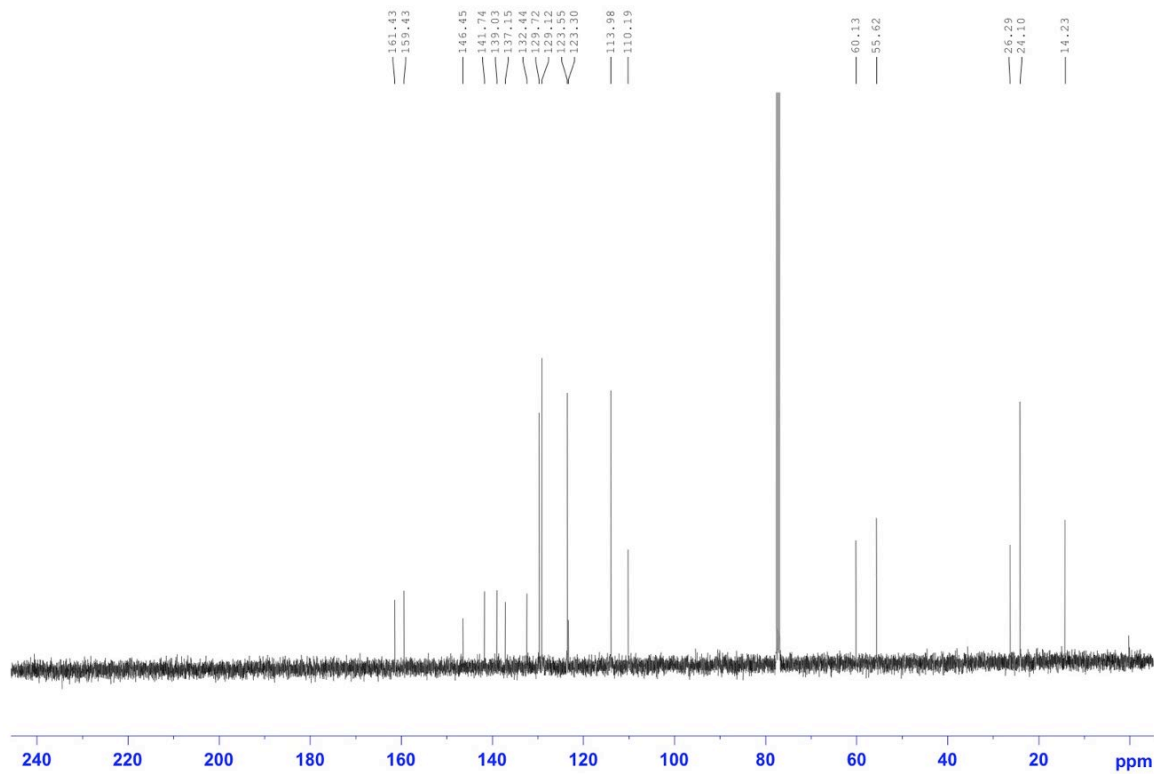

TWW-02-140 1H BBF01 CDC13

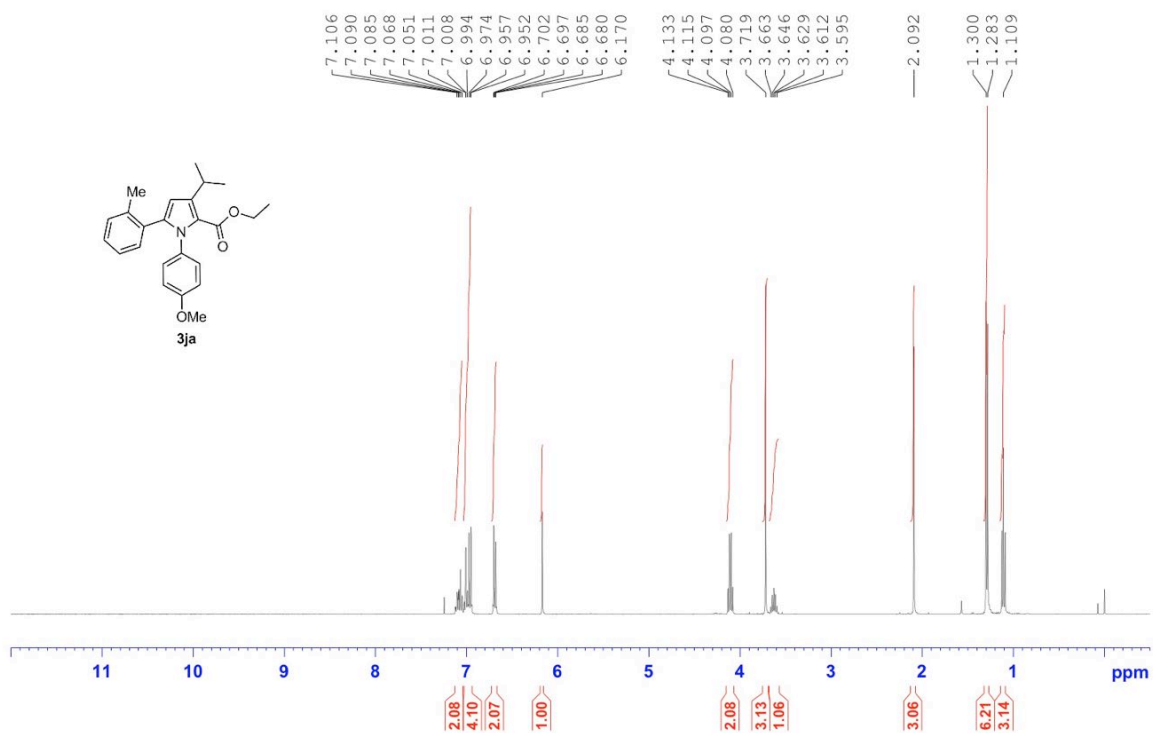

TWW-02-140 13C BBF01 CDC13

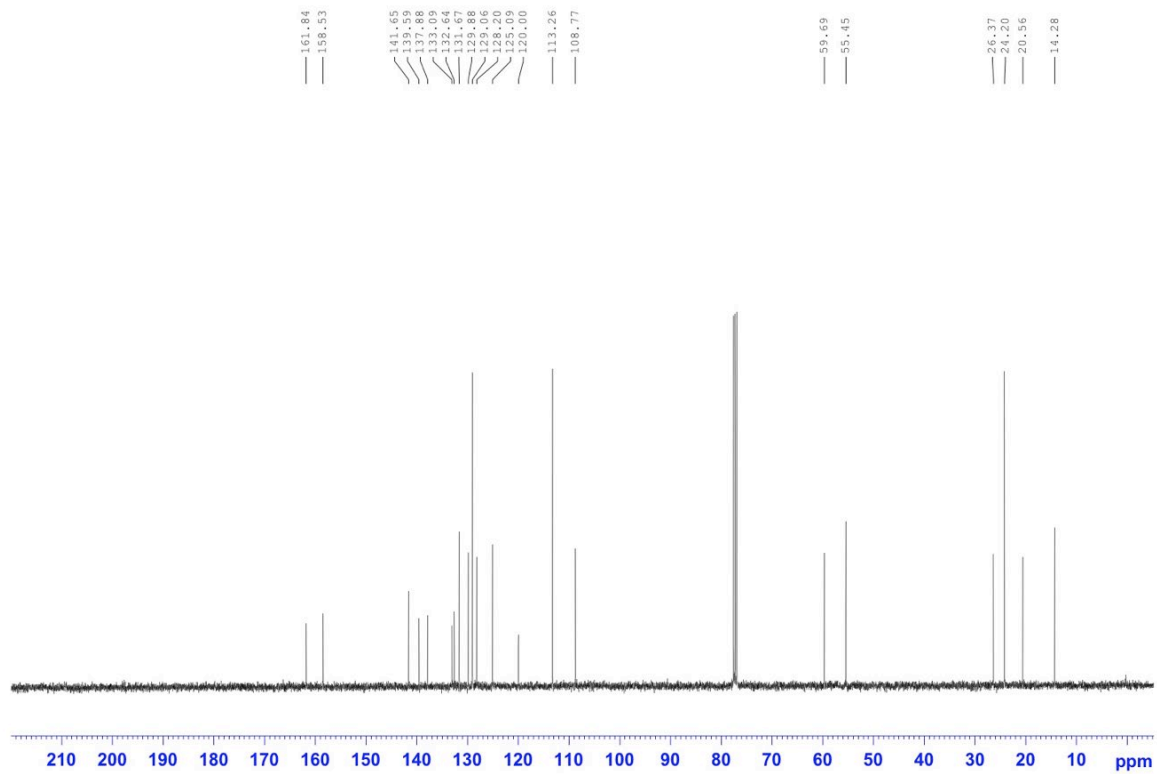

TWW-02-101 1H BBF01 CDC13

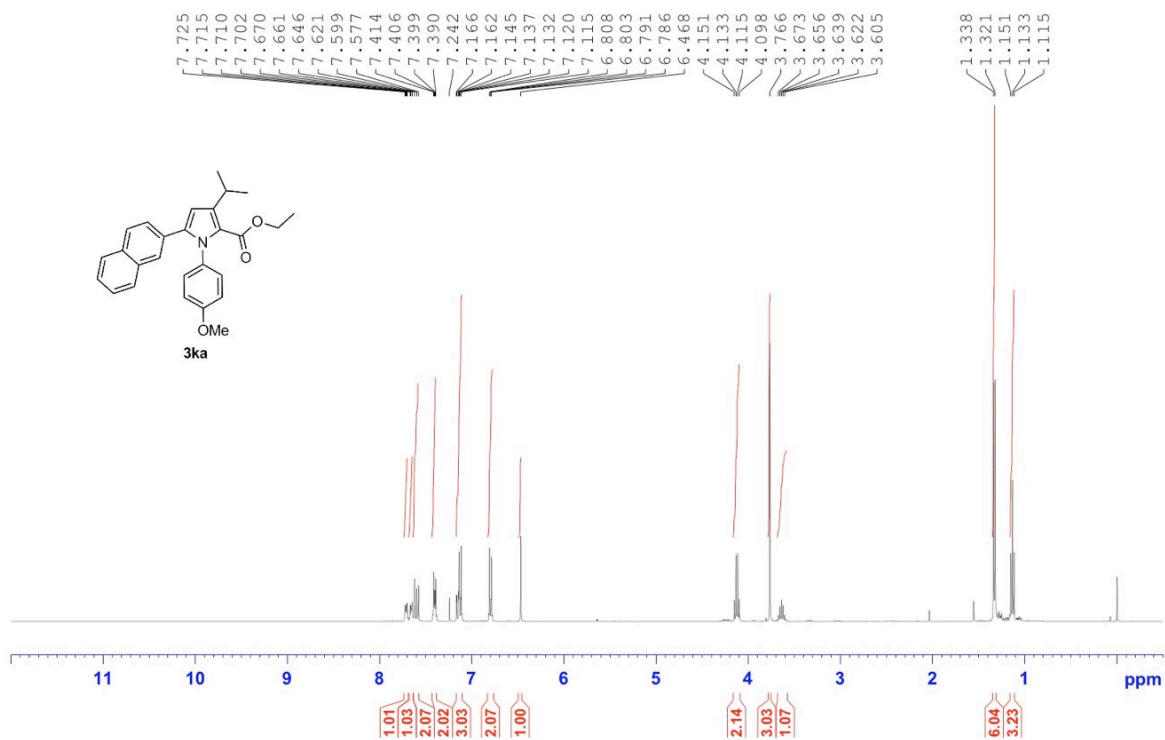

TWW-02-101 13C BBF01 CDC13

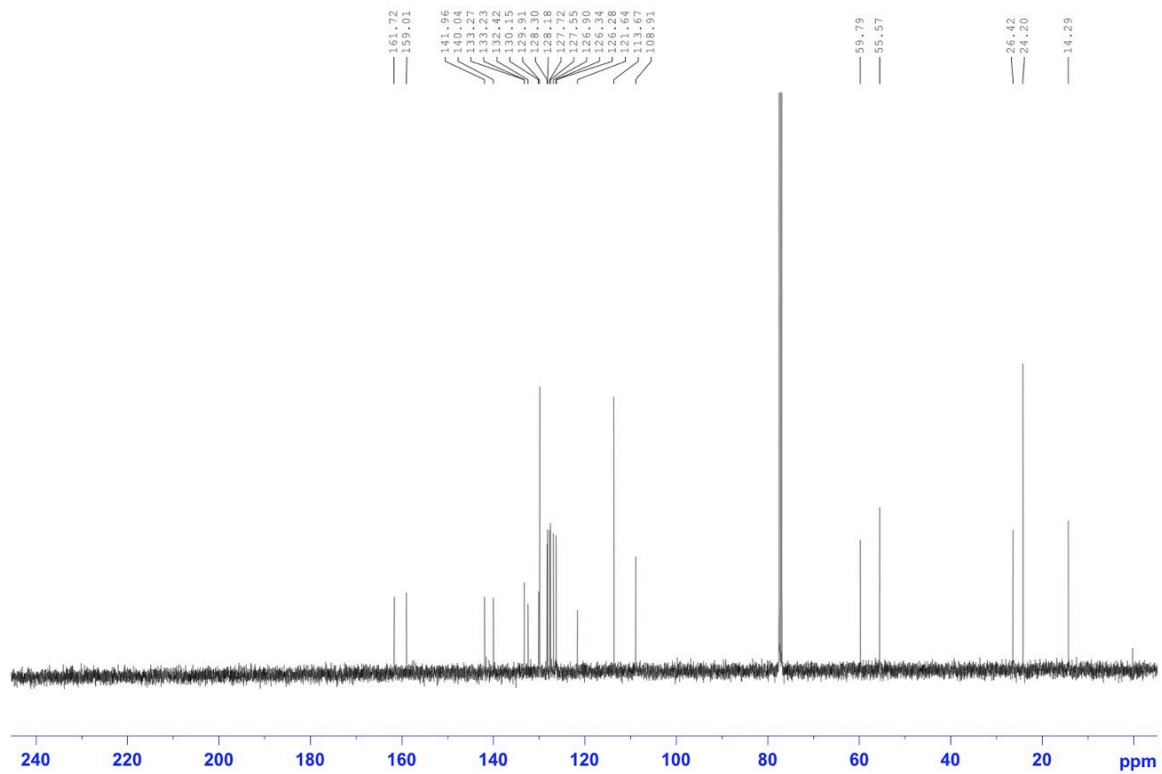

TWW-02-137 1H BBF01 CDC13

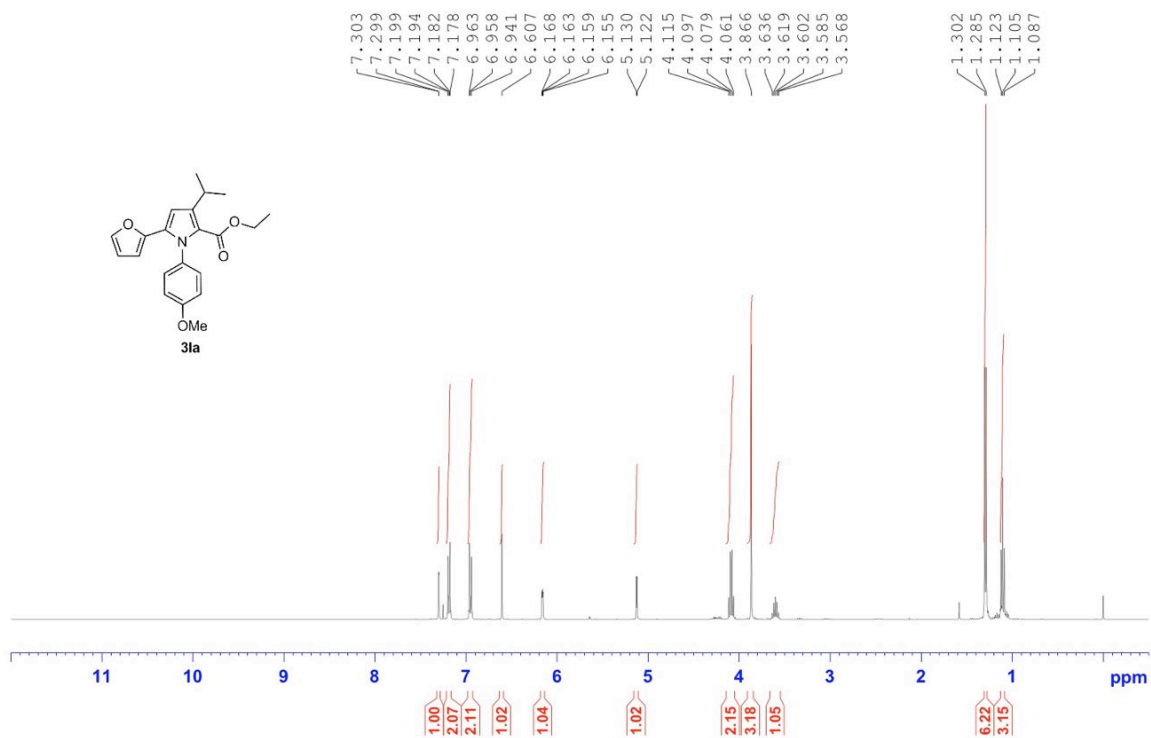

TWW-02-137 13C BBF01 CDC13

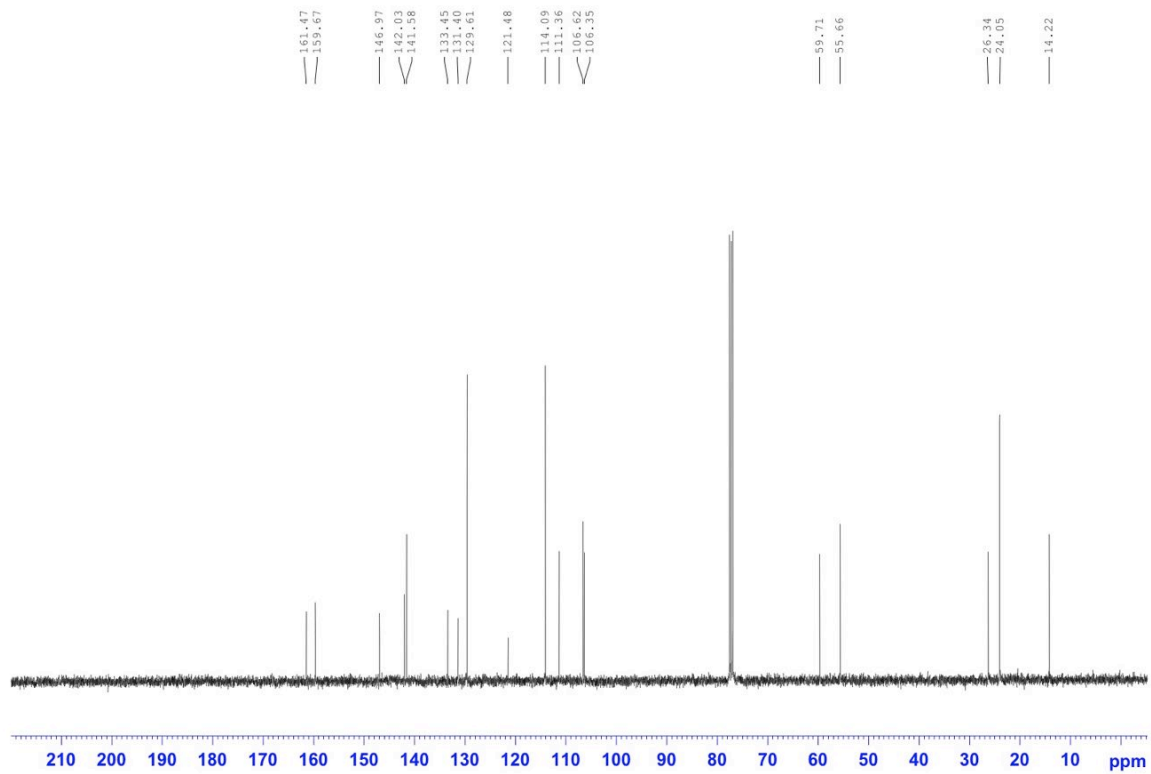

TWW-02-128 1H BBF01 CDC13

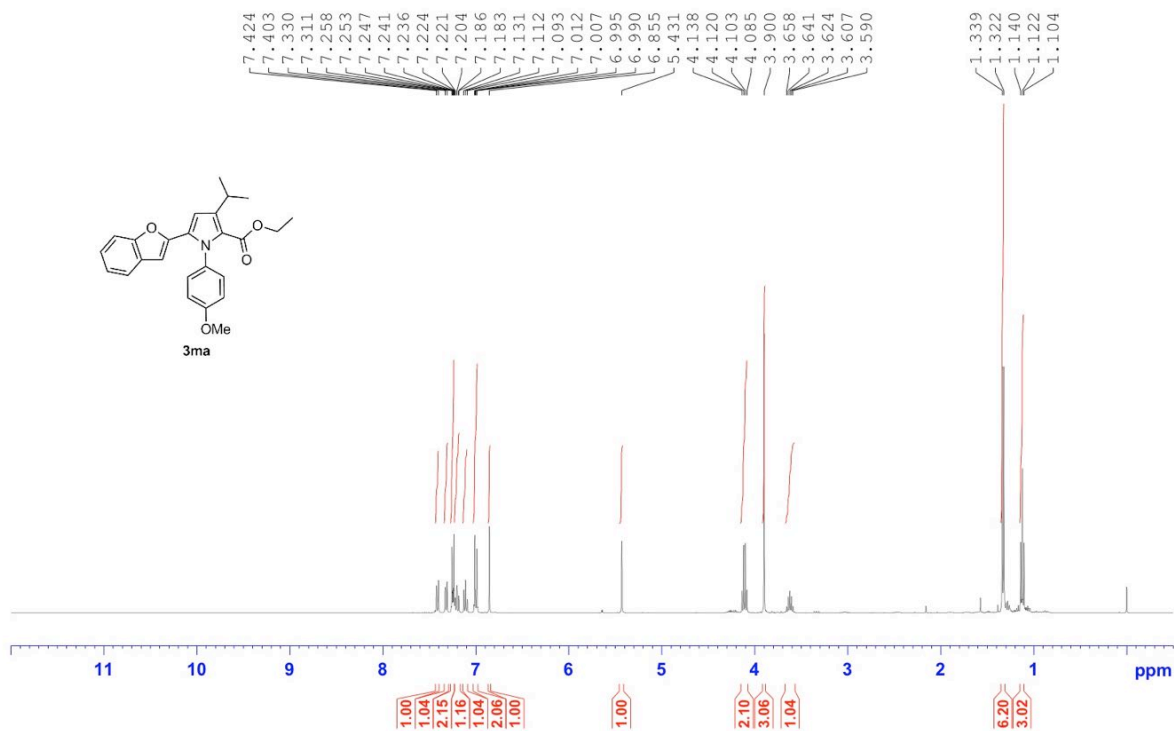

TWW-02-128 13C BBF01 CDC13

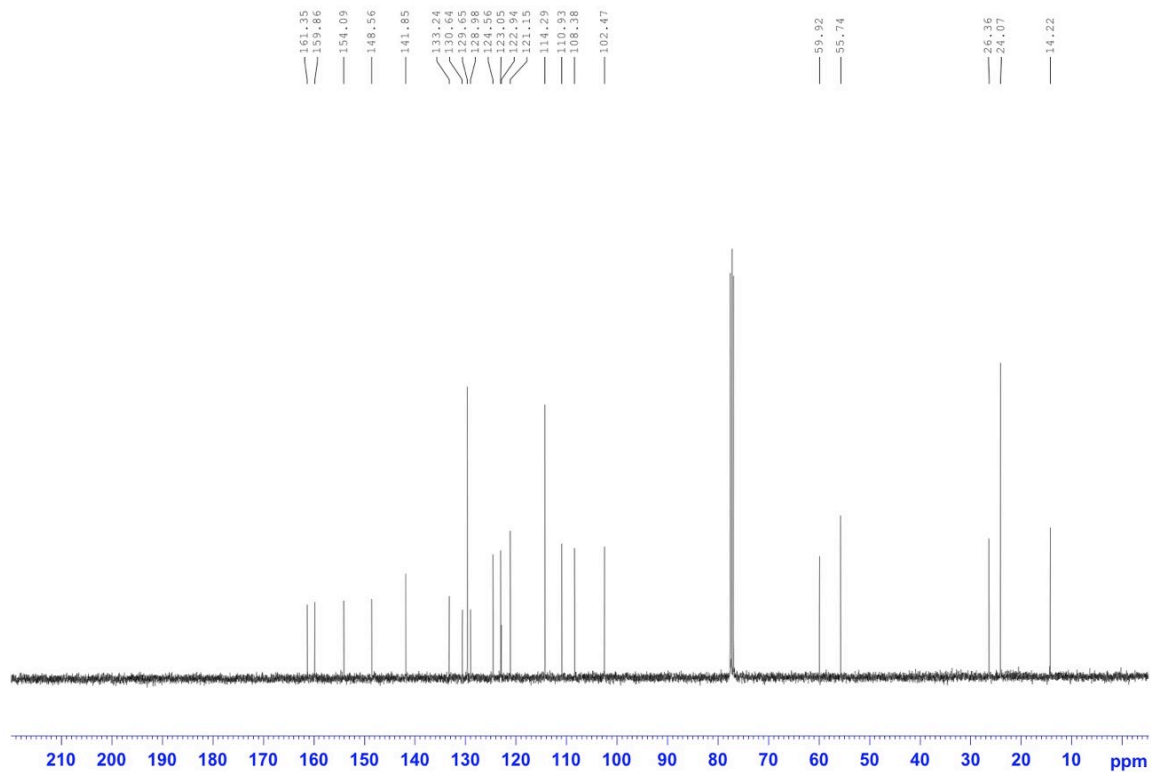

TWW-02-095, BBFO, 1H, CDC13

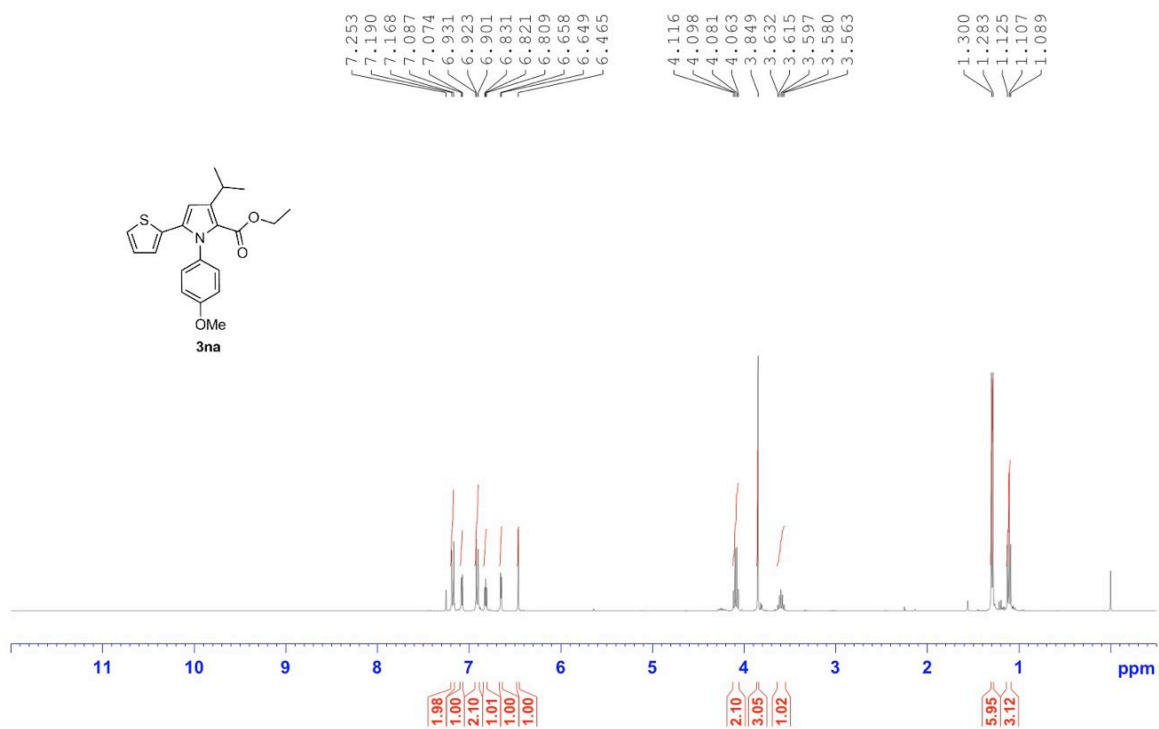

TWW-02-095, BBFO, 13C, CDC13

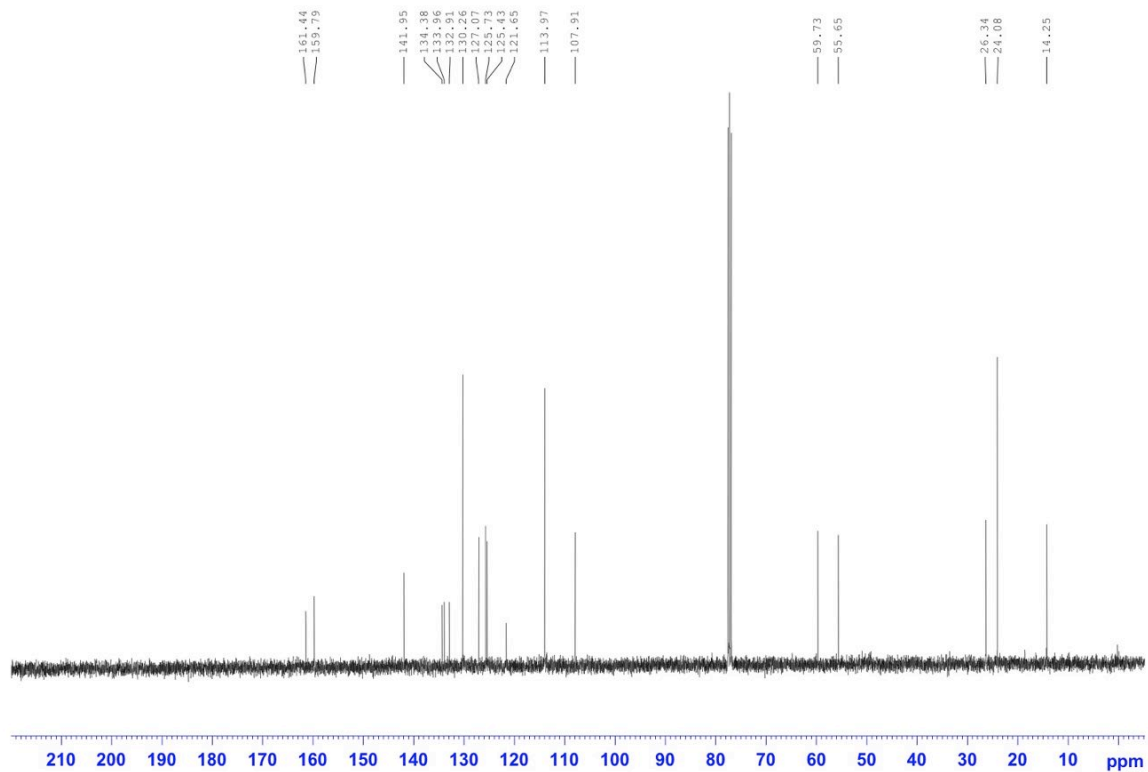

TWW-02-218, 1H, BBF01, CDCl3

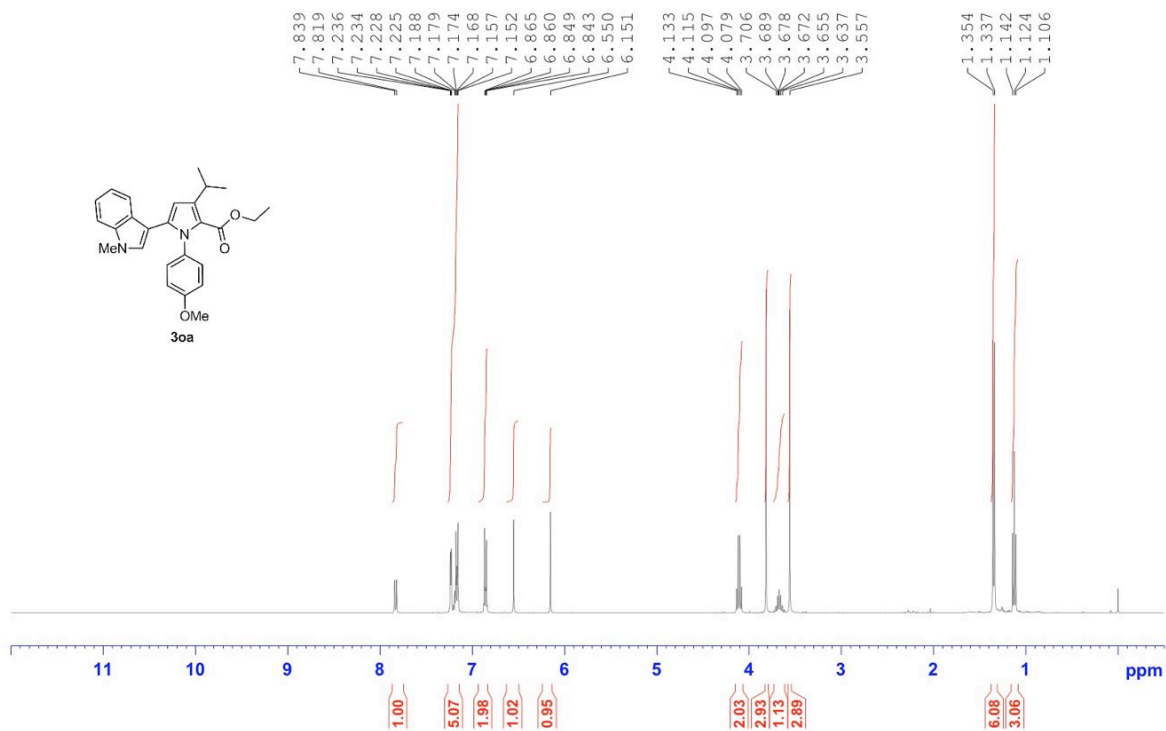

TWW-02-218, 13C, BBF01, CDCl3

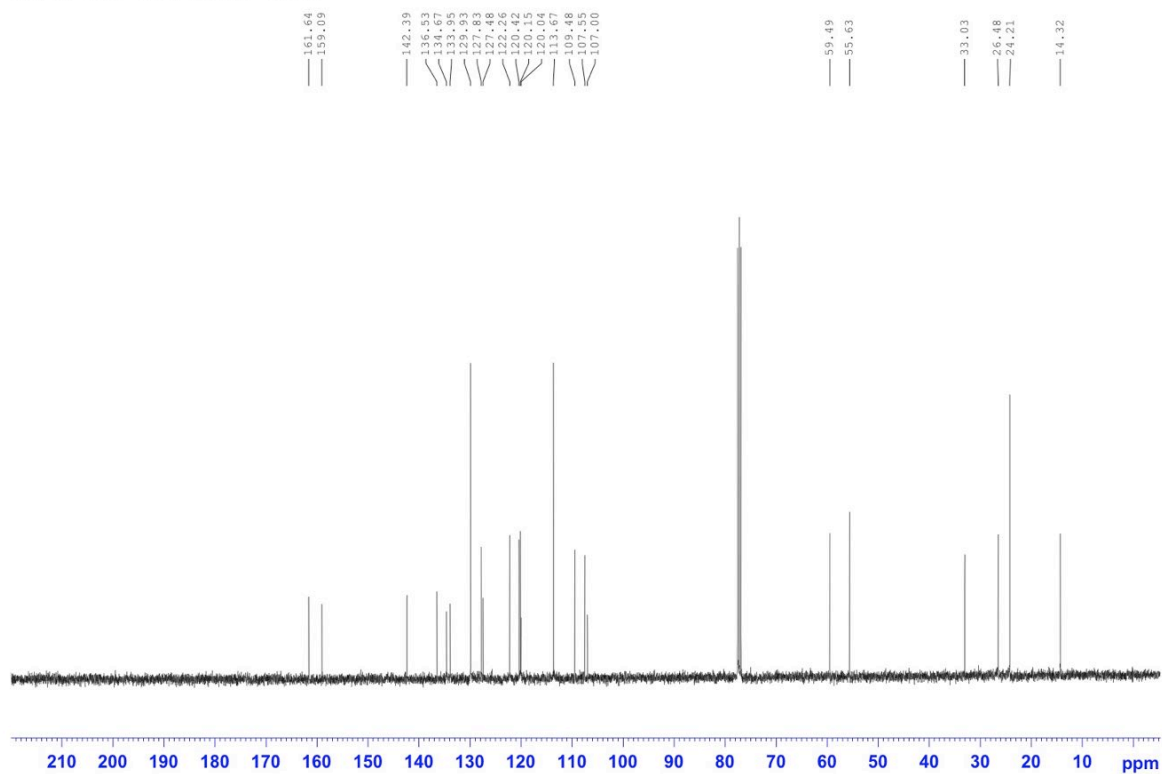



TWW-02-091, BBFO, 1H, CDC13

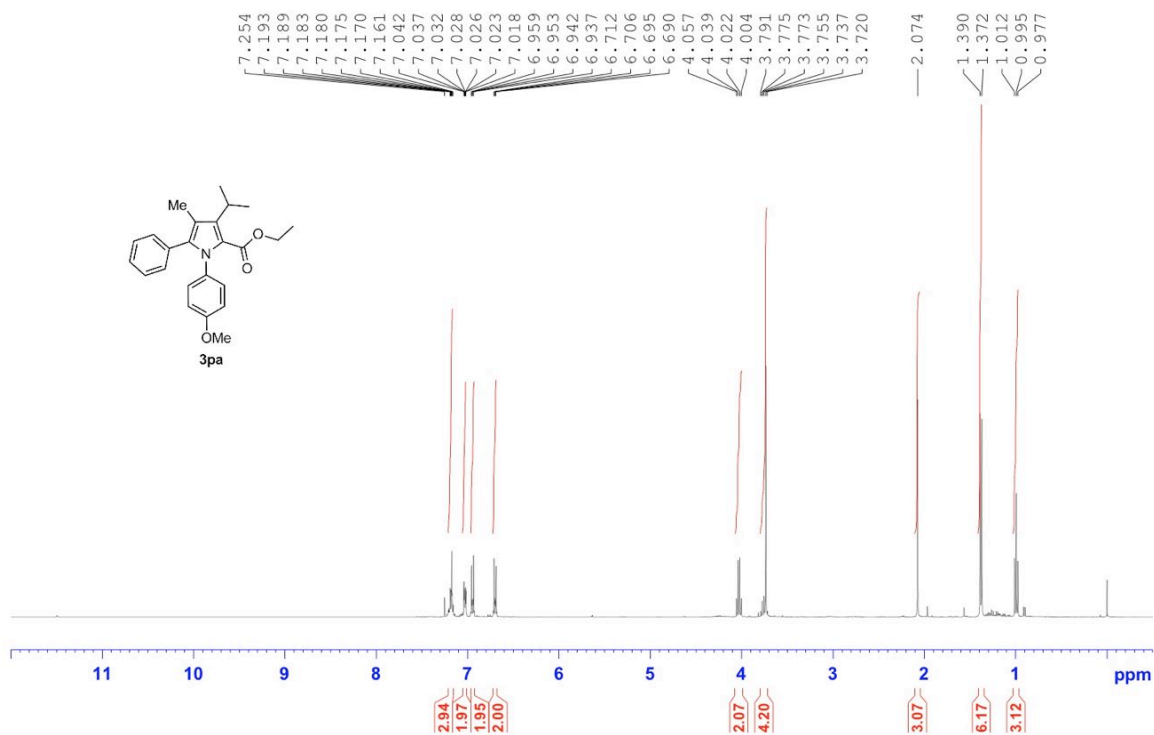

TWW-02-091, BBFO, 13C, CDC13

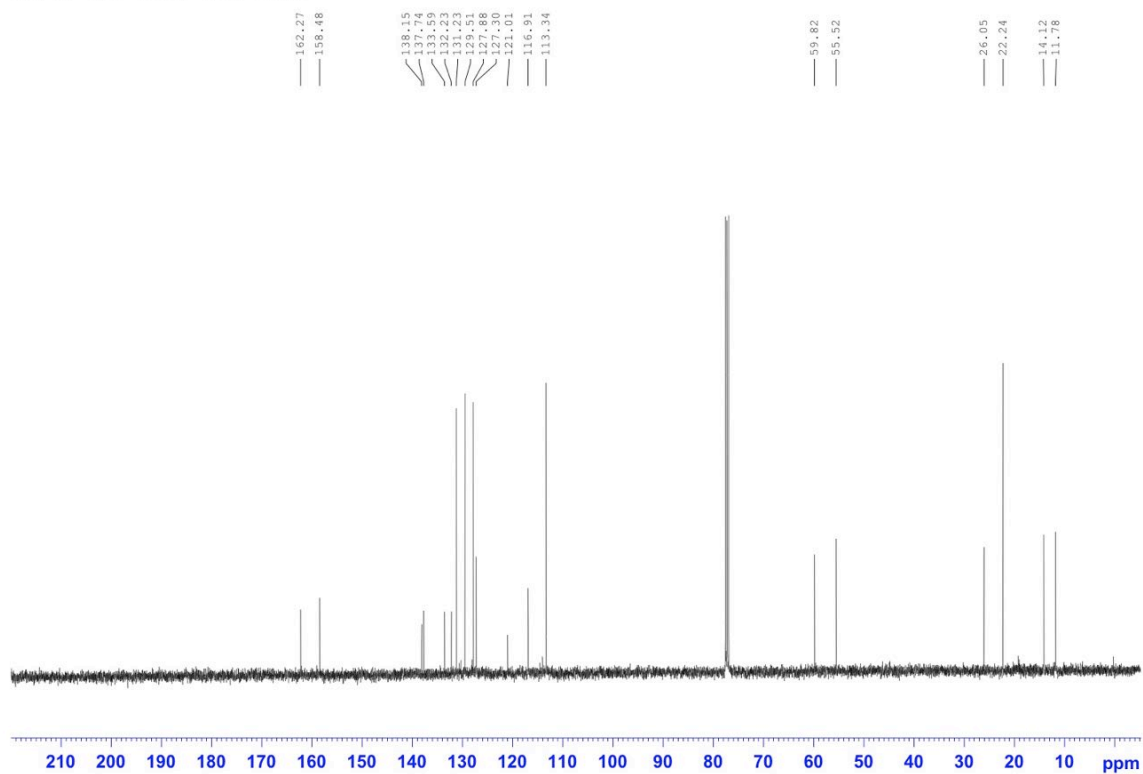

TWW-02-096, BBFO, <sup>13</sup>C, CDC13

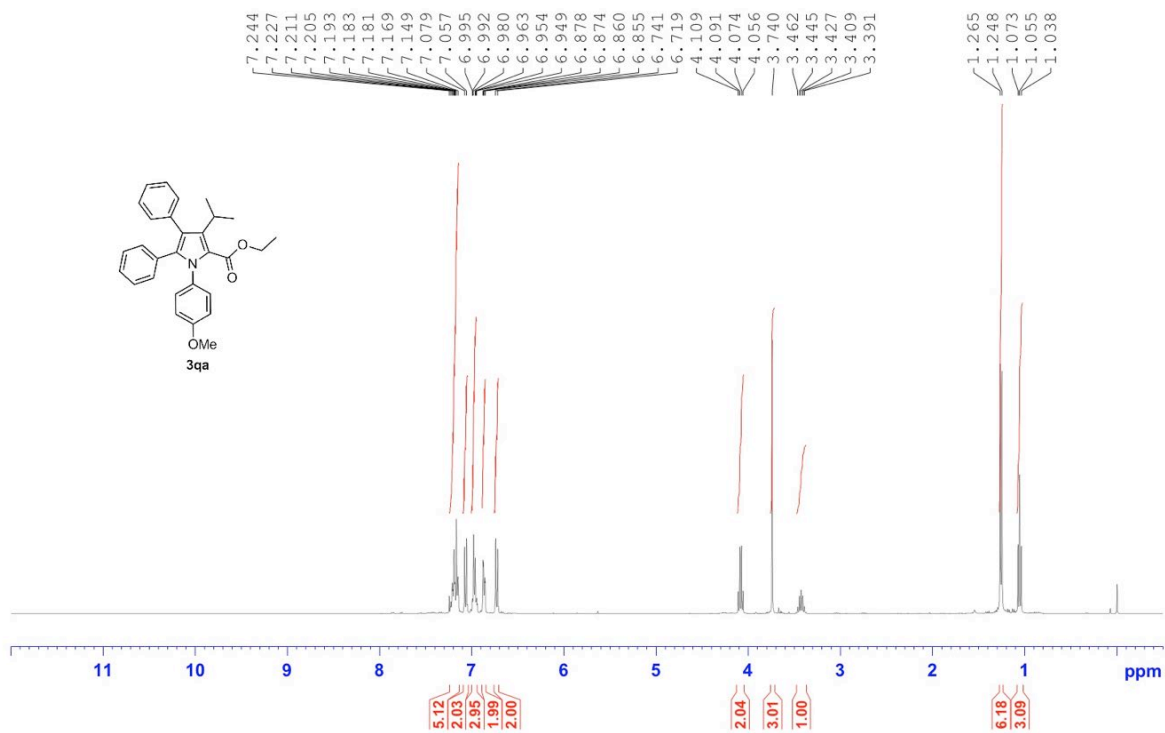

TWW-02-096, BBFO, <sup>13</sup>C, CDC13

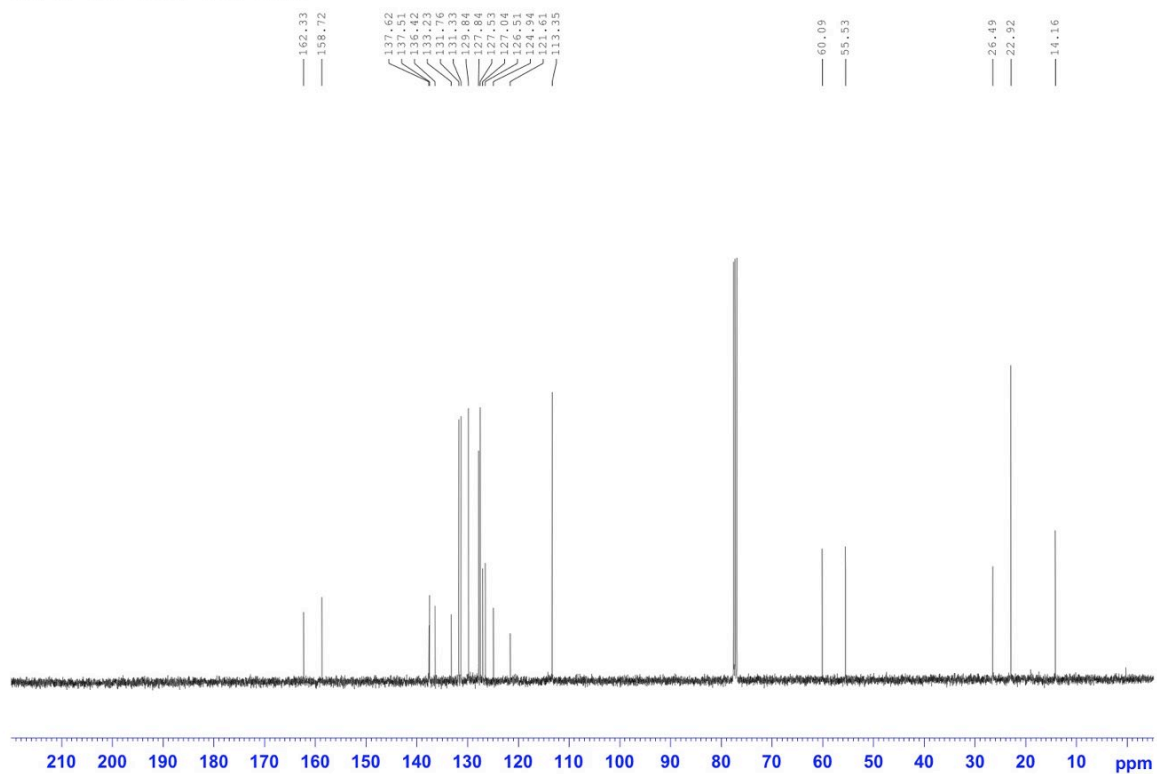

TWW-02-240, 1H, BBF01, CDCl3

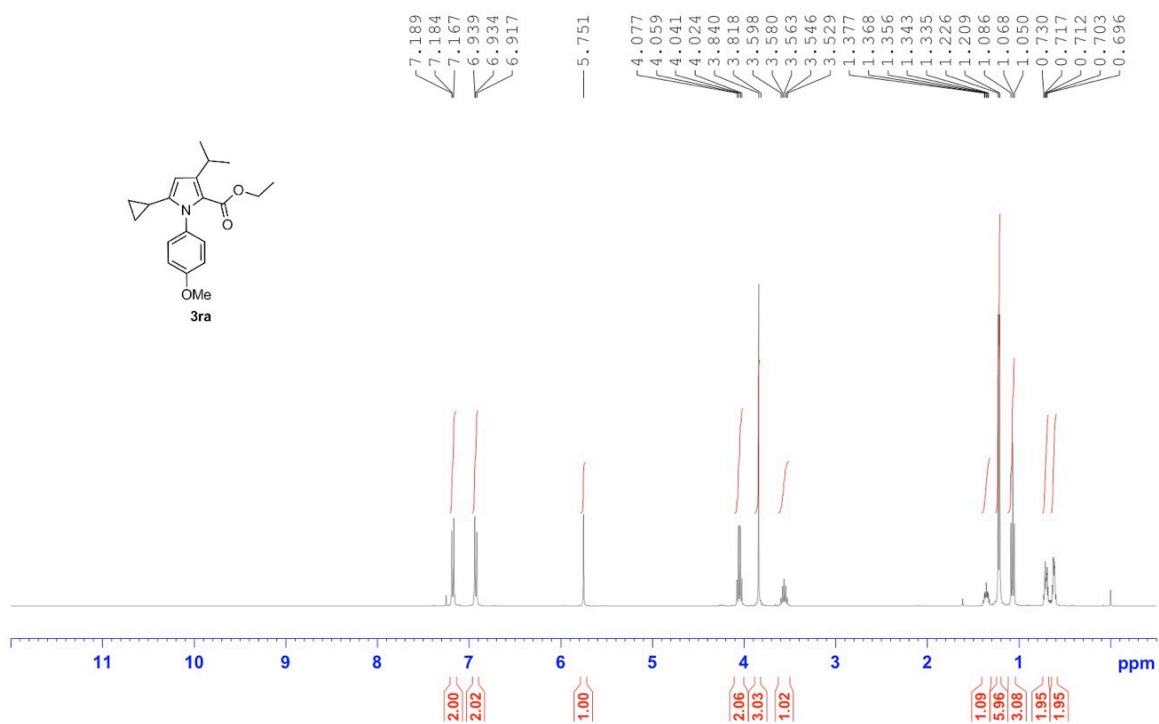

TWW-02-240, 13C, BBF01, CDCl3

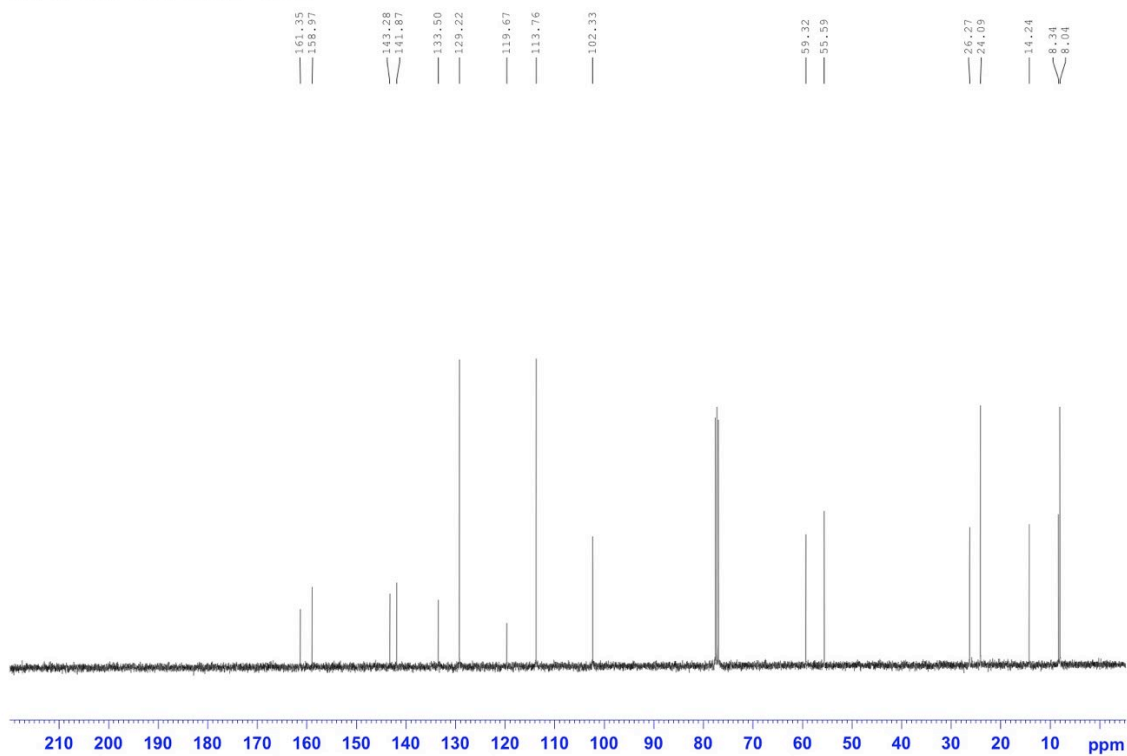

TWW-02-245, 1H, BBF01, CDC13

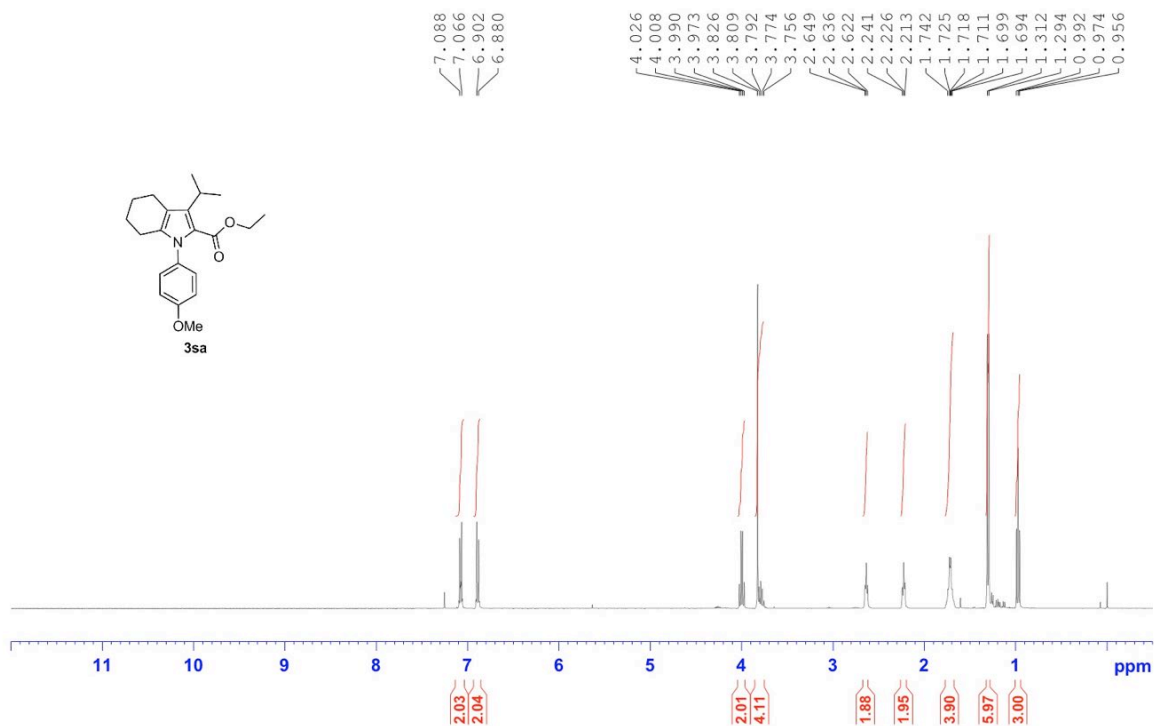

TWW-02-245, 13C, BBF01, CDC13

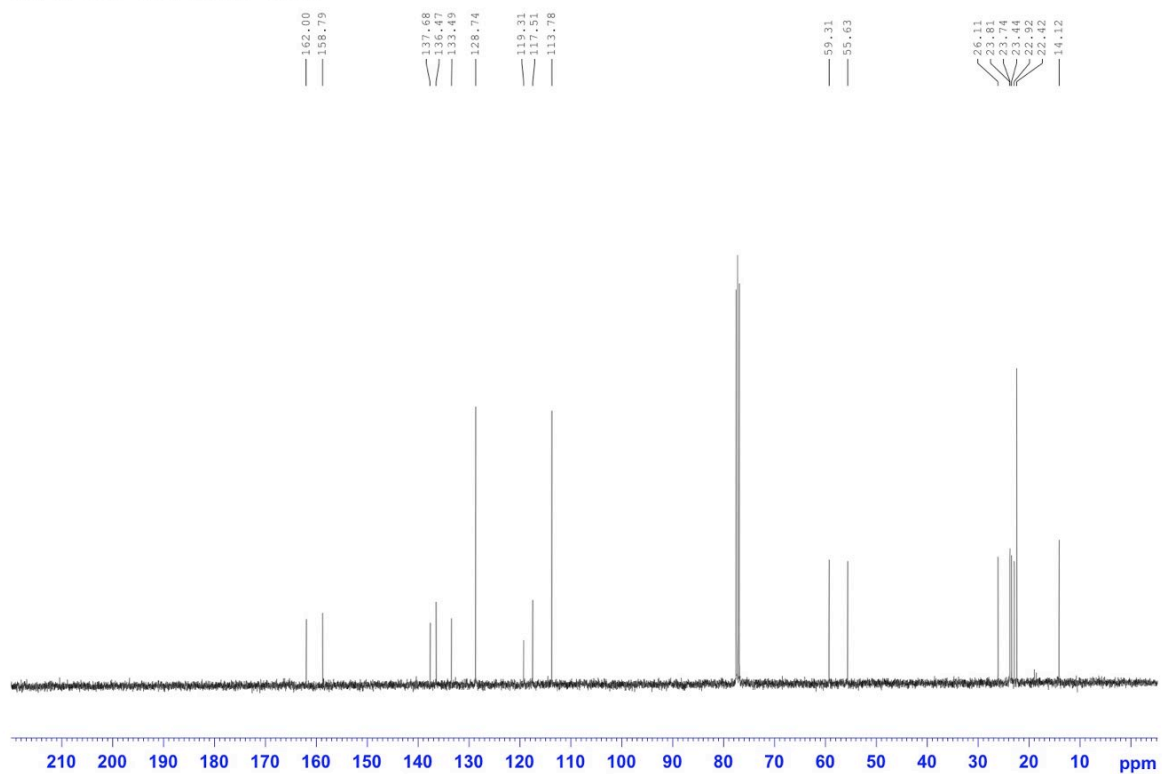

TWW-02-238, 1H, BBF01, CDC13

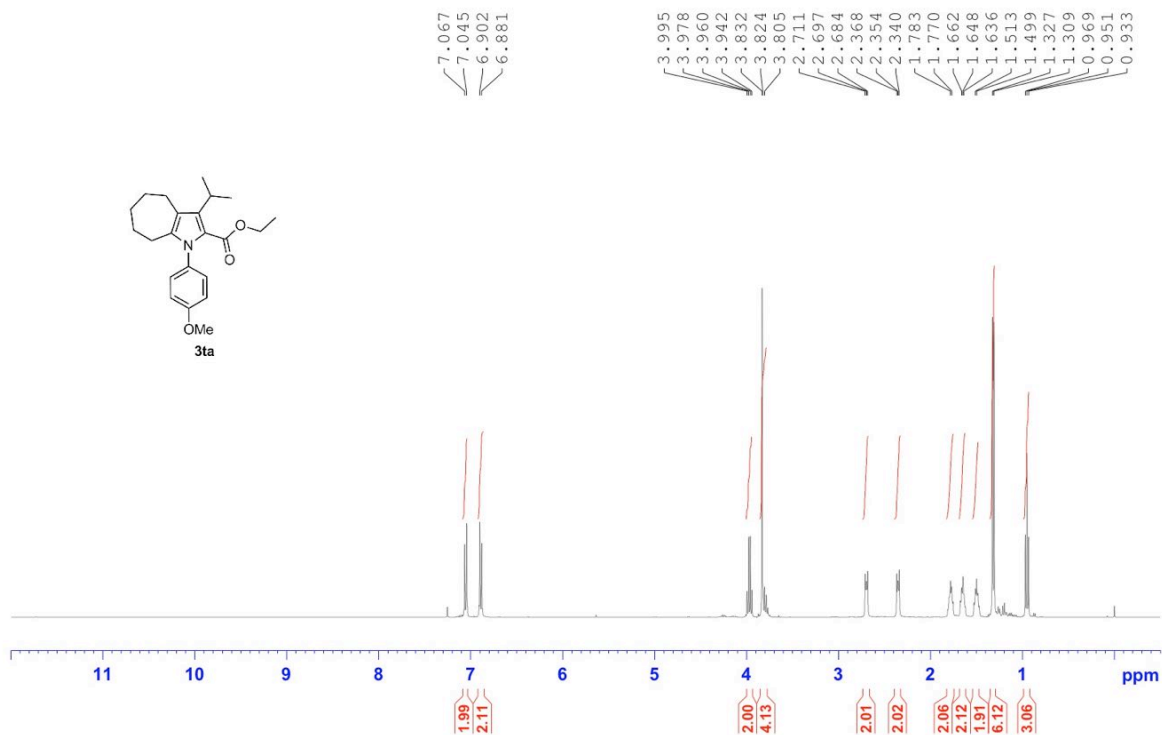

TWW-02-238, 13C, BBF01, CDC13

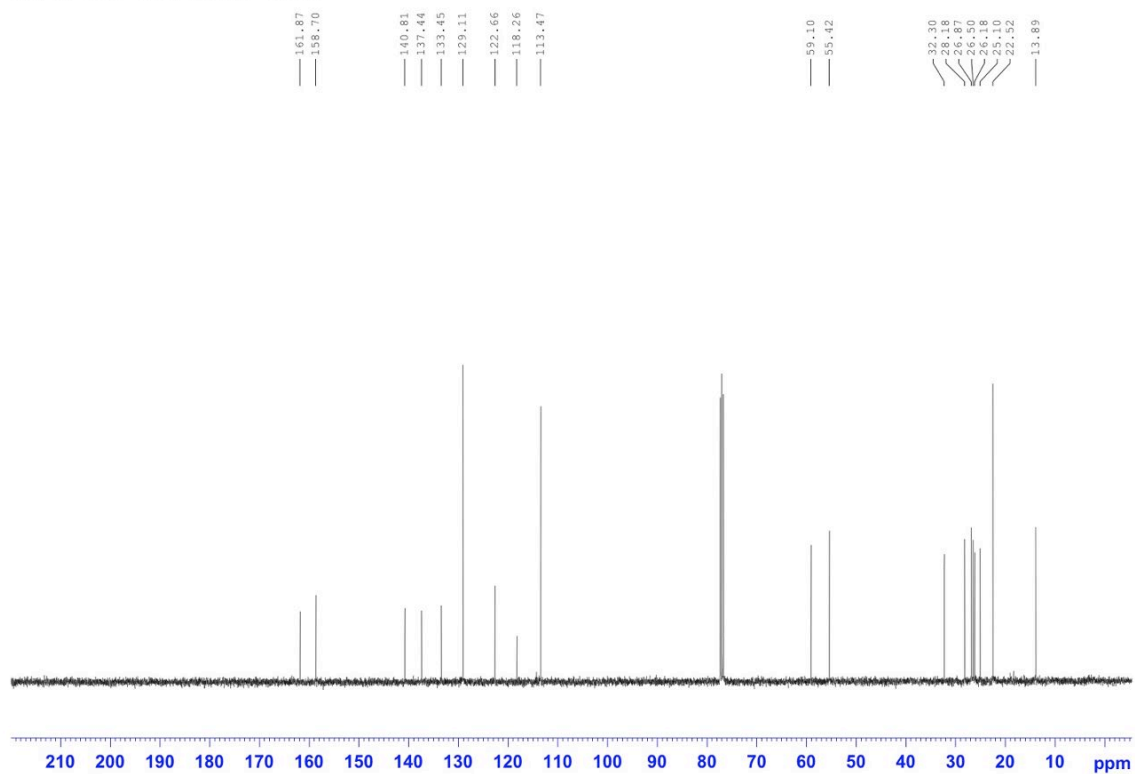

TWW-02-236-1, 1H NMR, 400M Hz, BBFO2

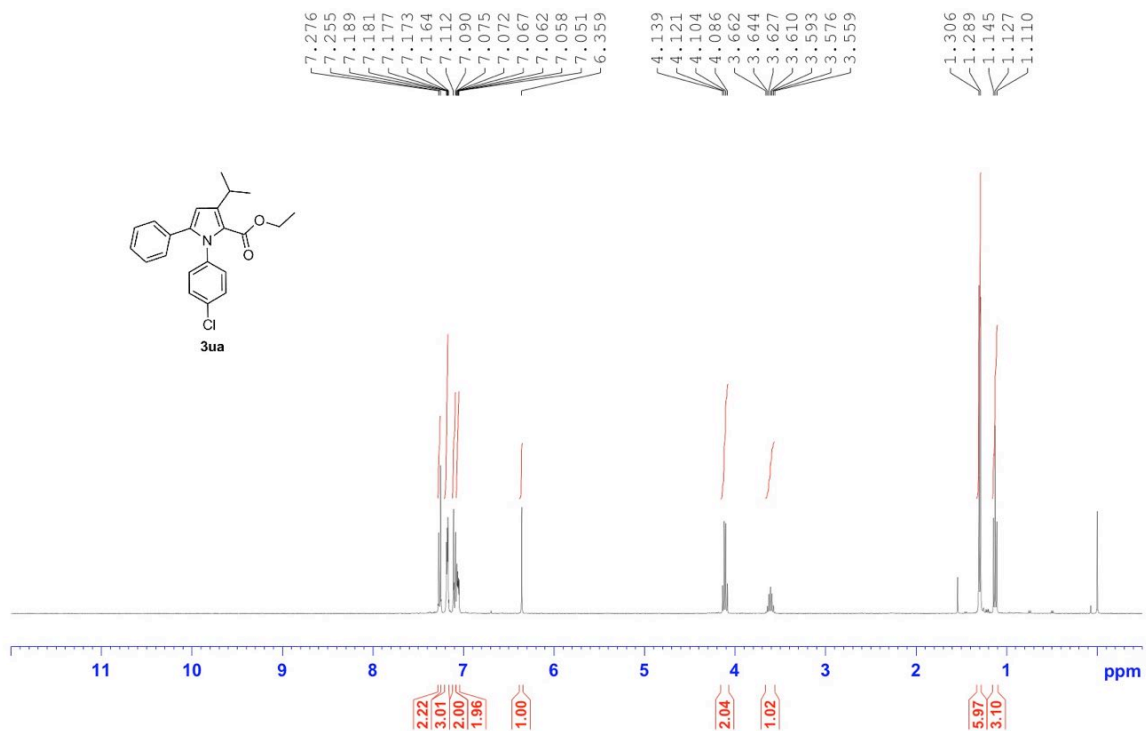

TWW-02-236-1, 13C NMR, 400M Hz, BBFO2

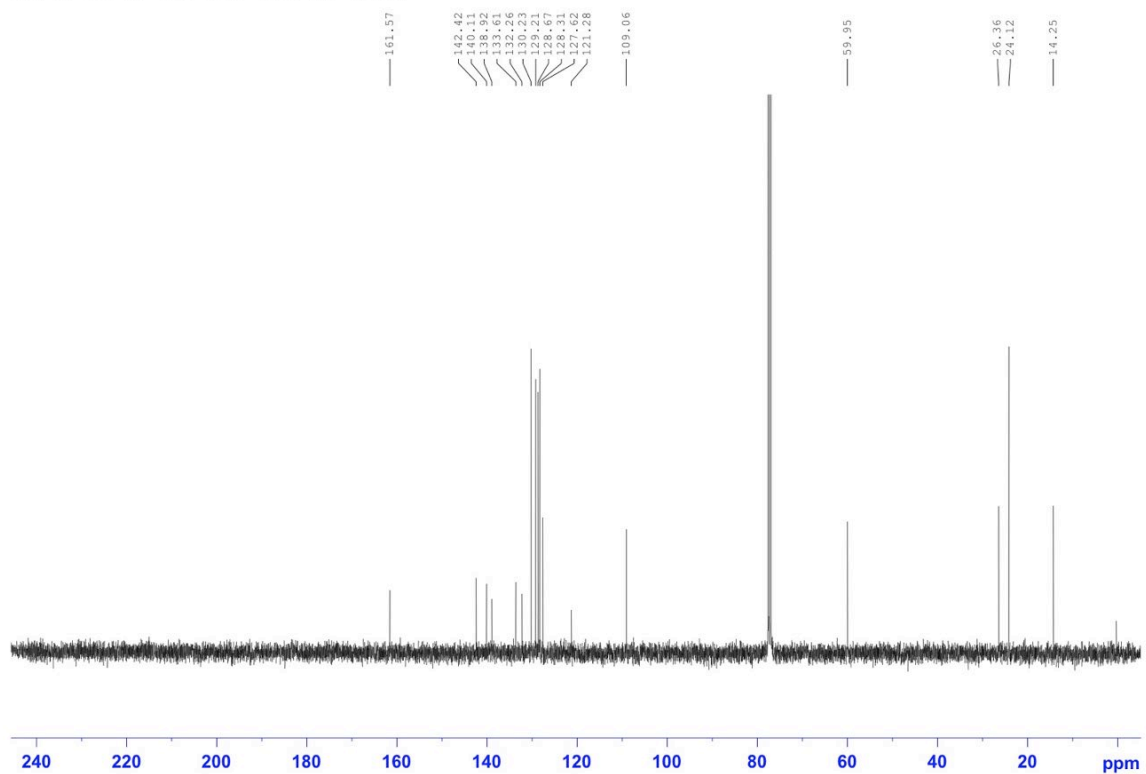

TWW-02-083, BBFO, 1H, CDC13

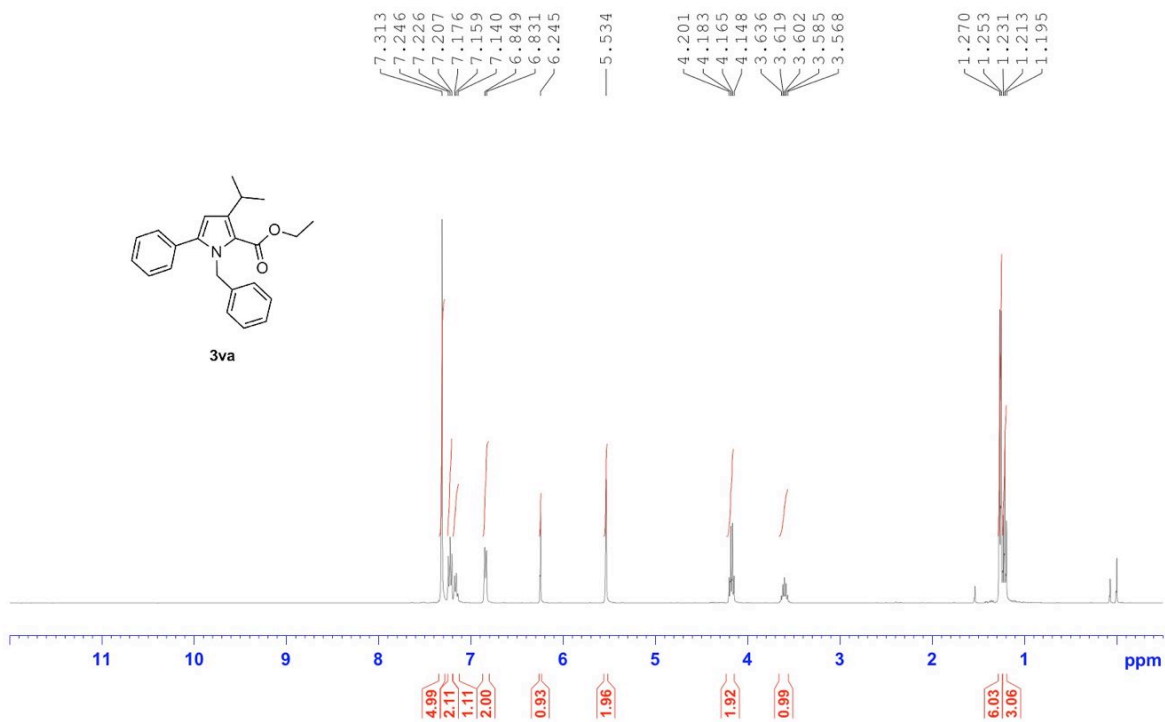

TWW-02-083, BBFO, 13C, CDC13

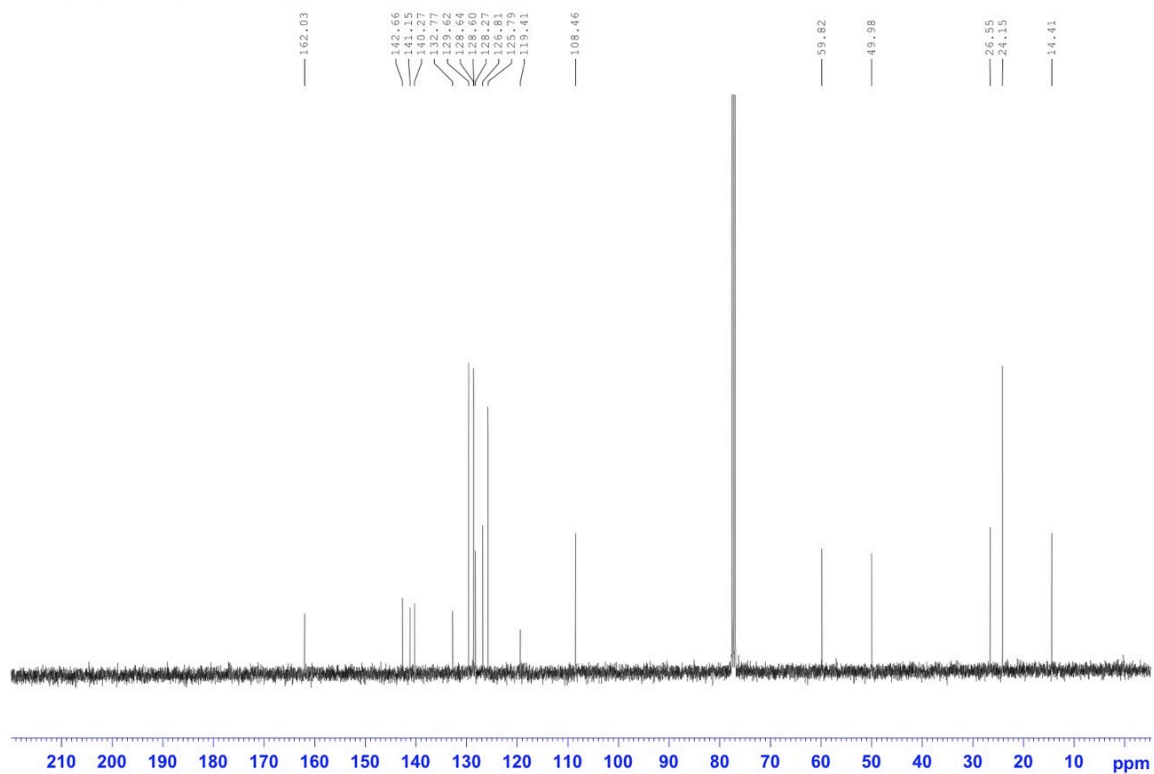

TWW-02-147 1H BBF01 CDCl3

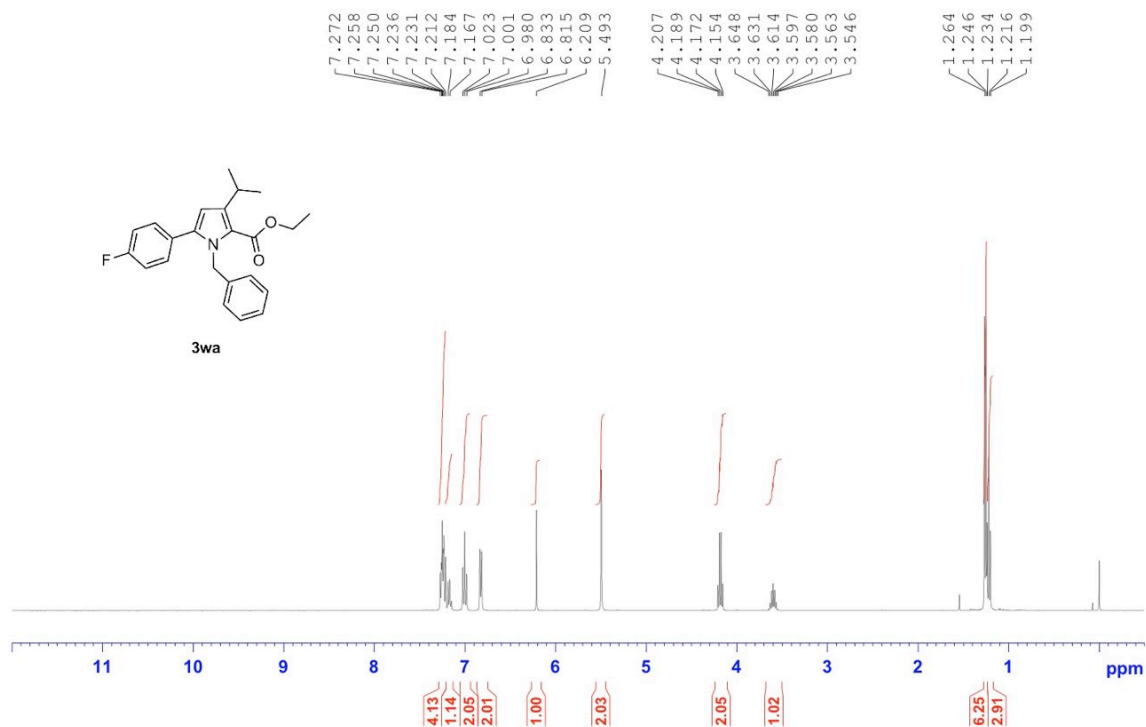

TWW-02-147 13C BBF01 CDCl3

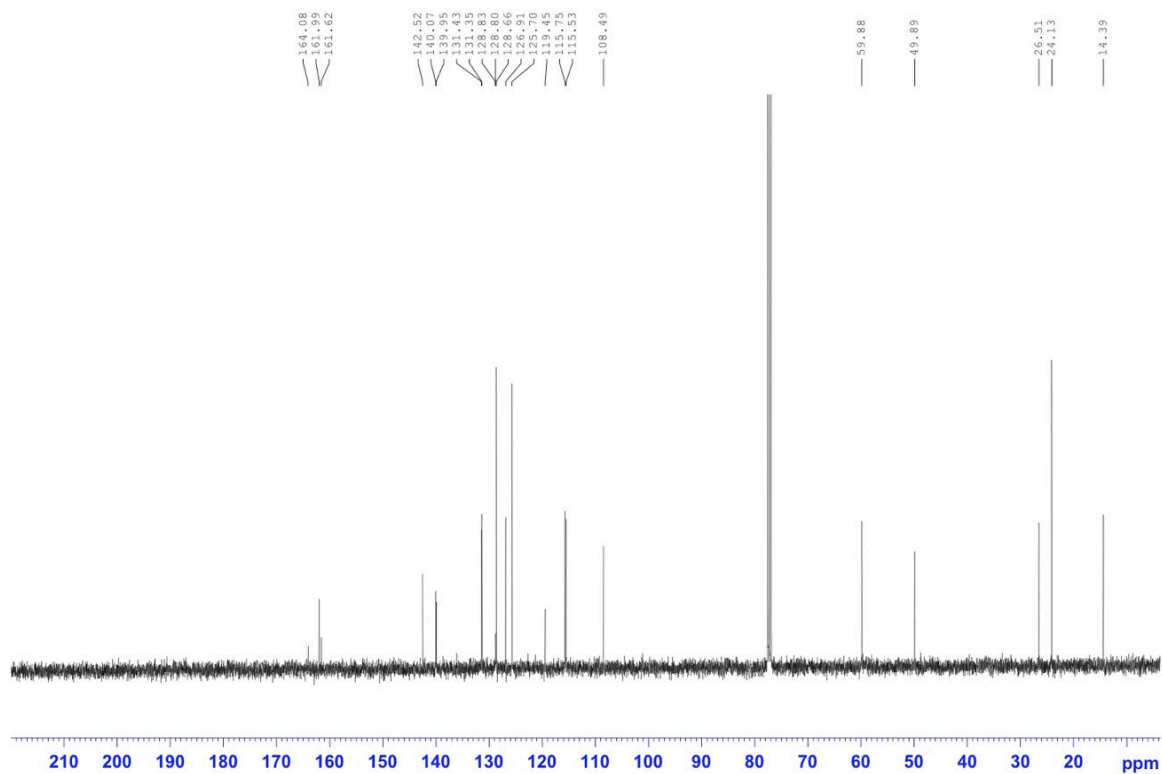



TWW-02-146 1H BBF01 CDCl3

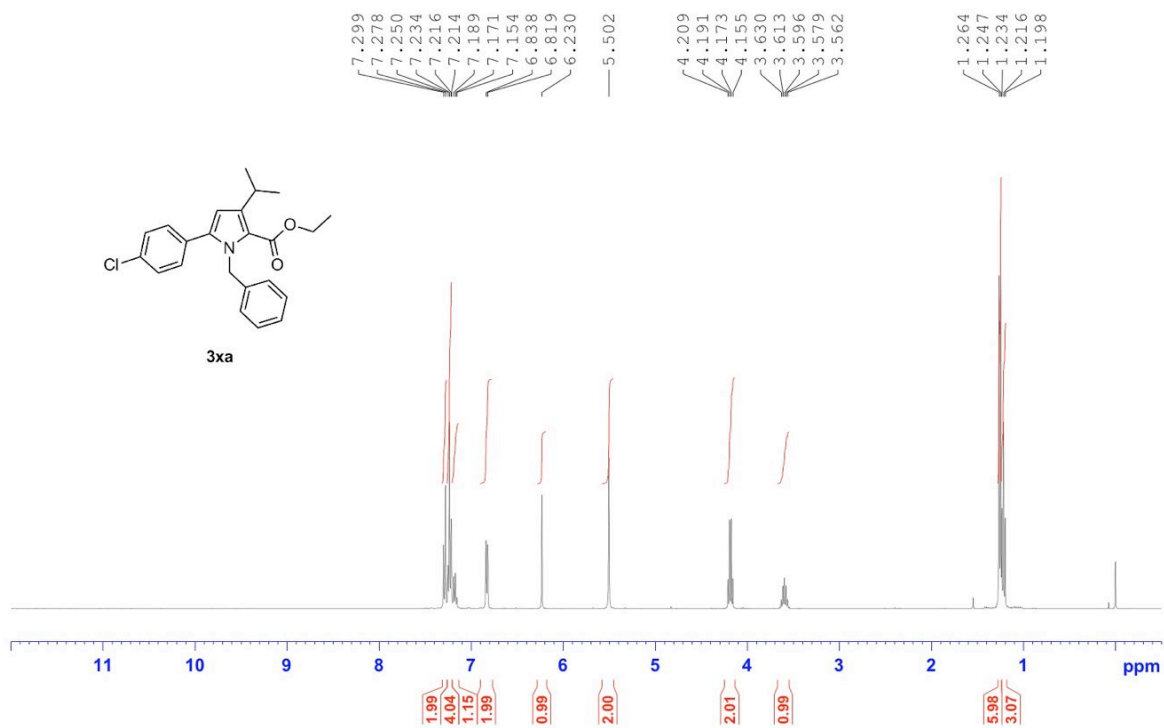

TWW-02-146 13C BBF01 CDCl3

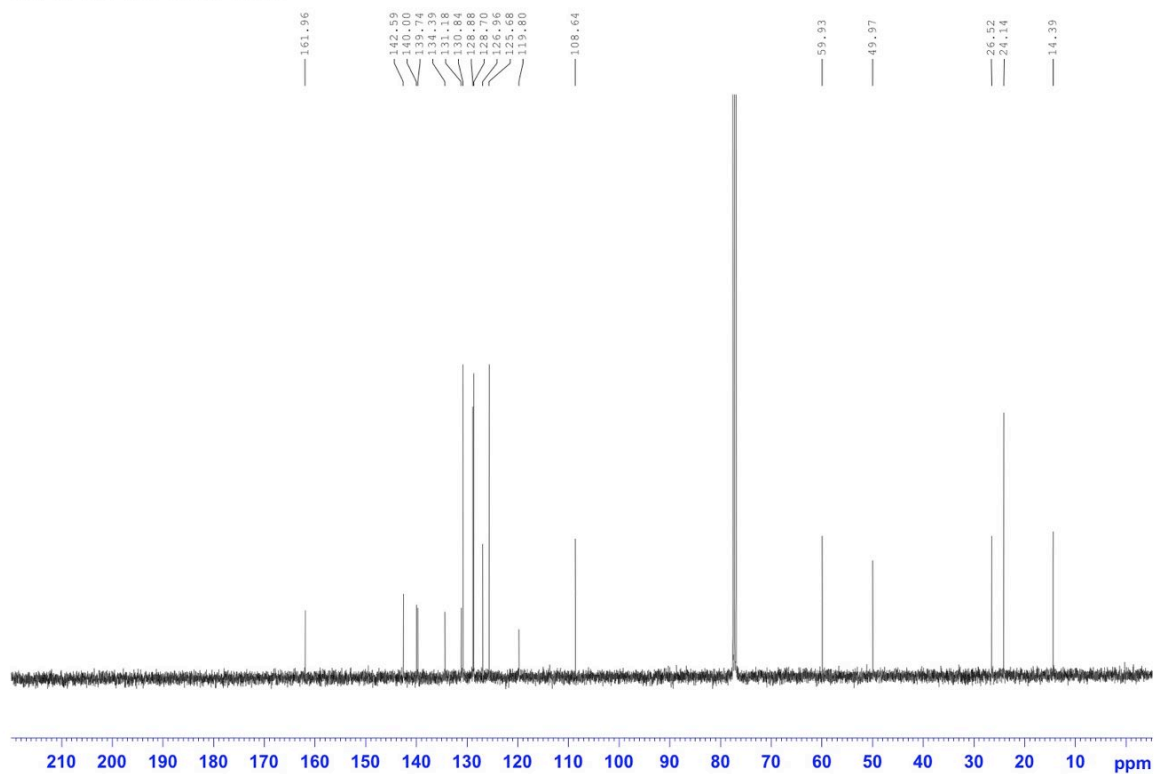

TWW-02-129 1H BBF01 CDCl3

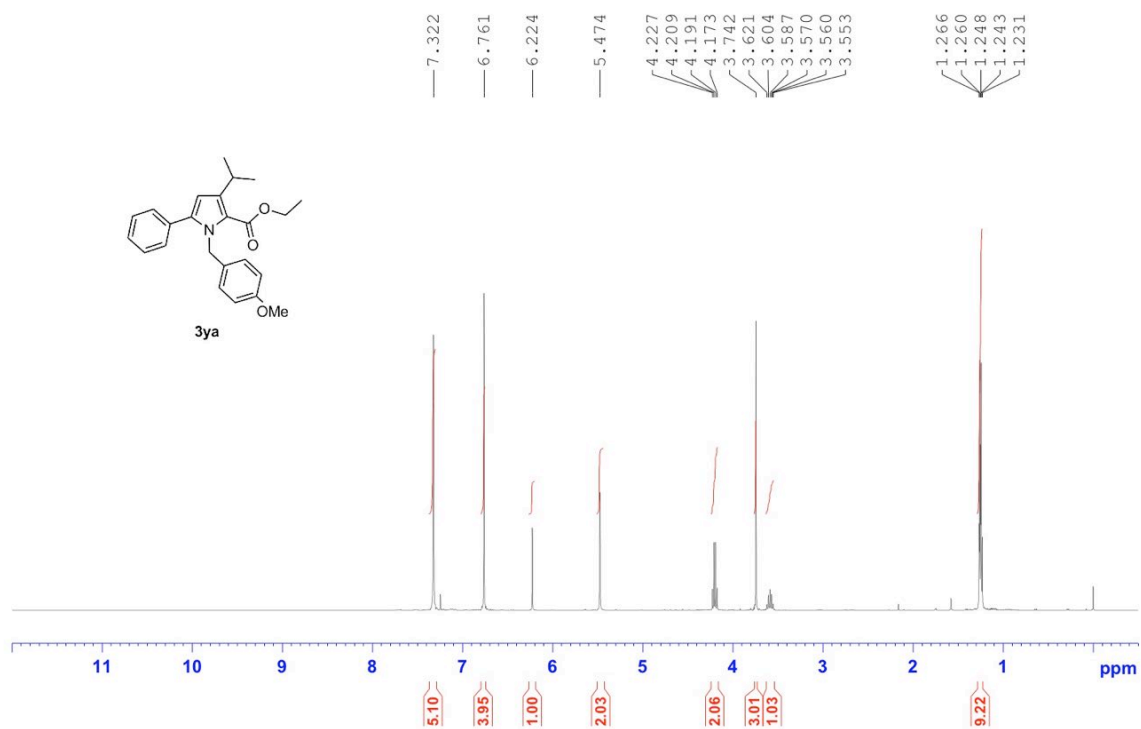

TWW-02-129 13C BBF01 CDCl3

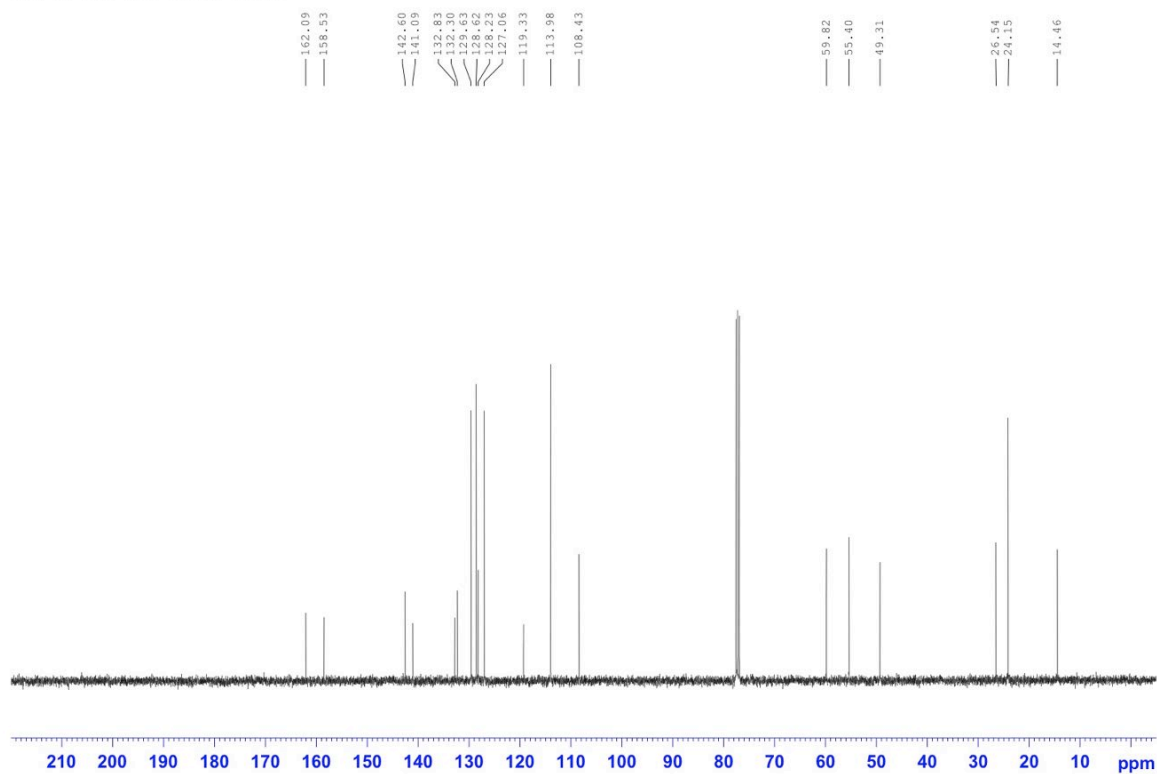

TWW-02-402-acetone, 1H, BBF01, Acetone

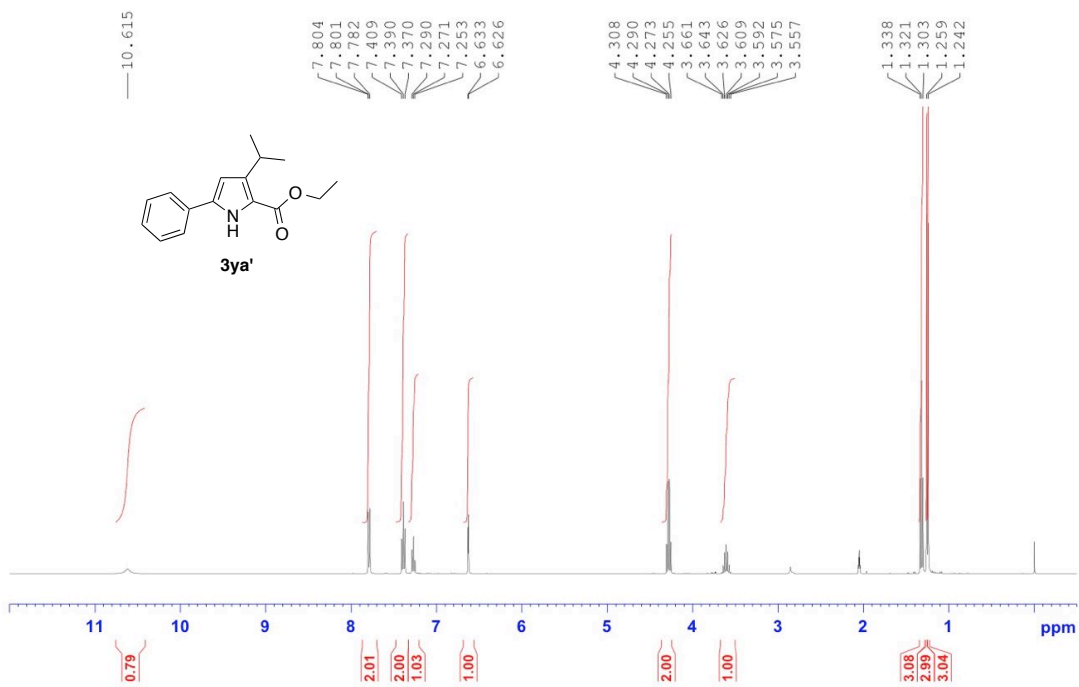

TWW-02-402-acetone, 13C, BBF01, Acetone

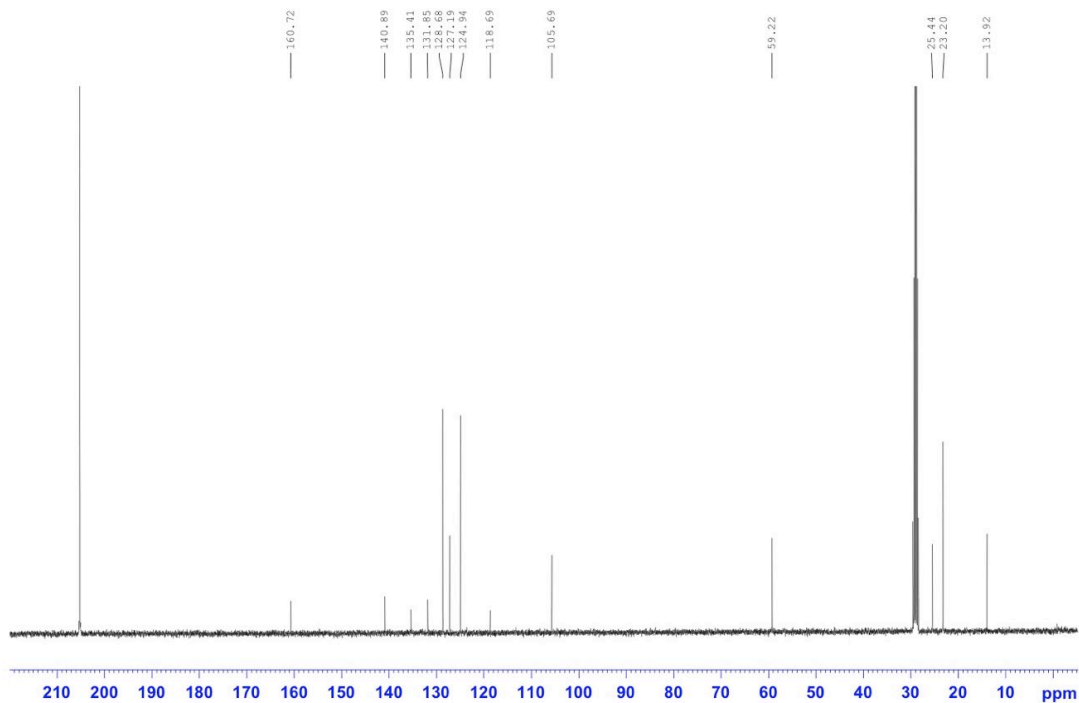

TWW-02-085, BBFO, 1H, CDC13

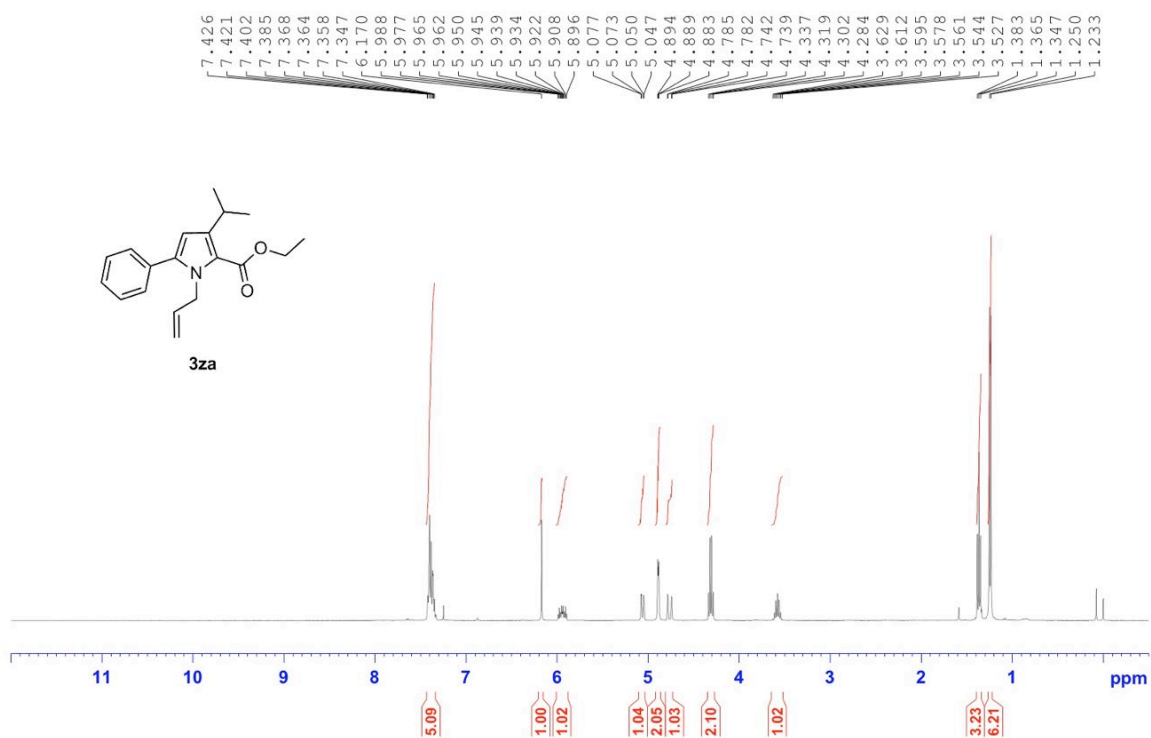

TWW-02-085, BBFO, 13C, CDC13

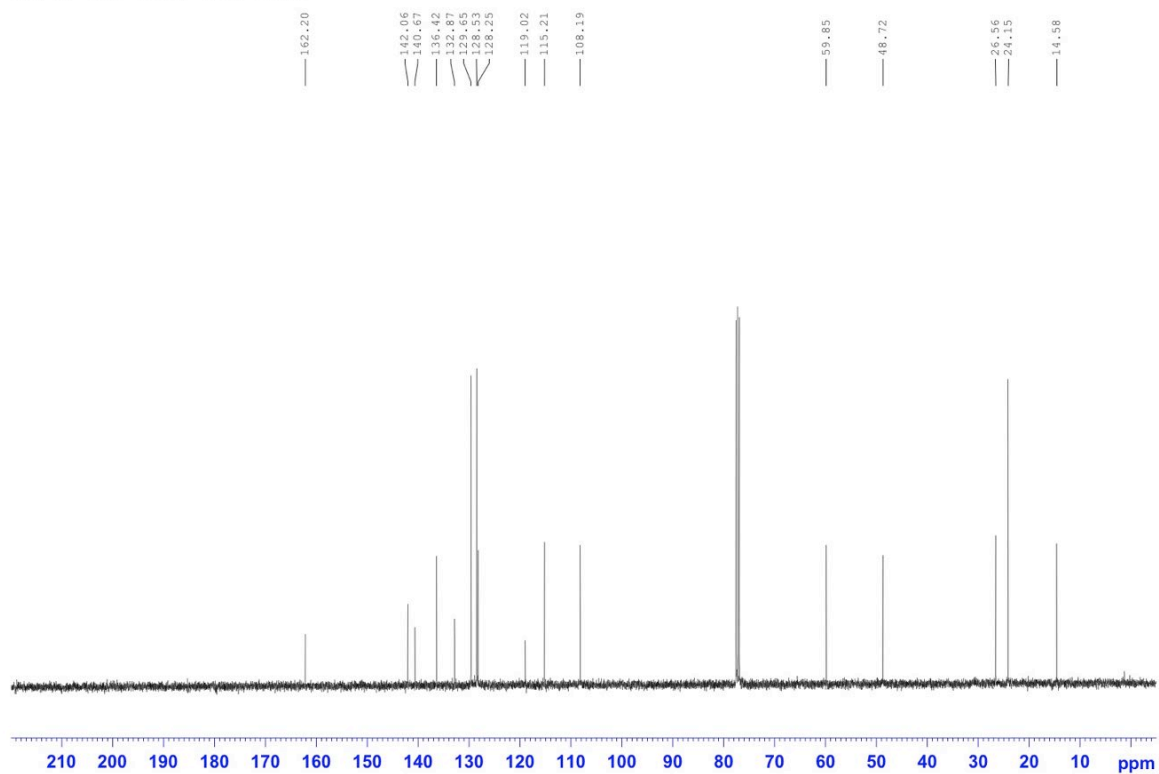

TWW-02-295, 1H, BBF01, CDC13

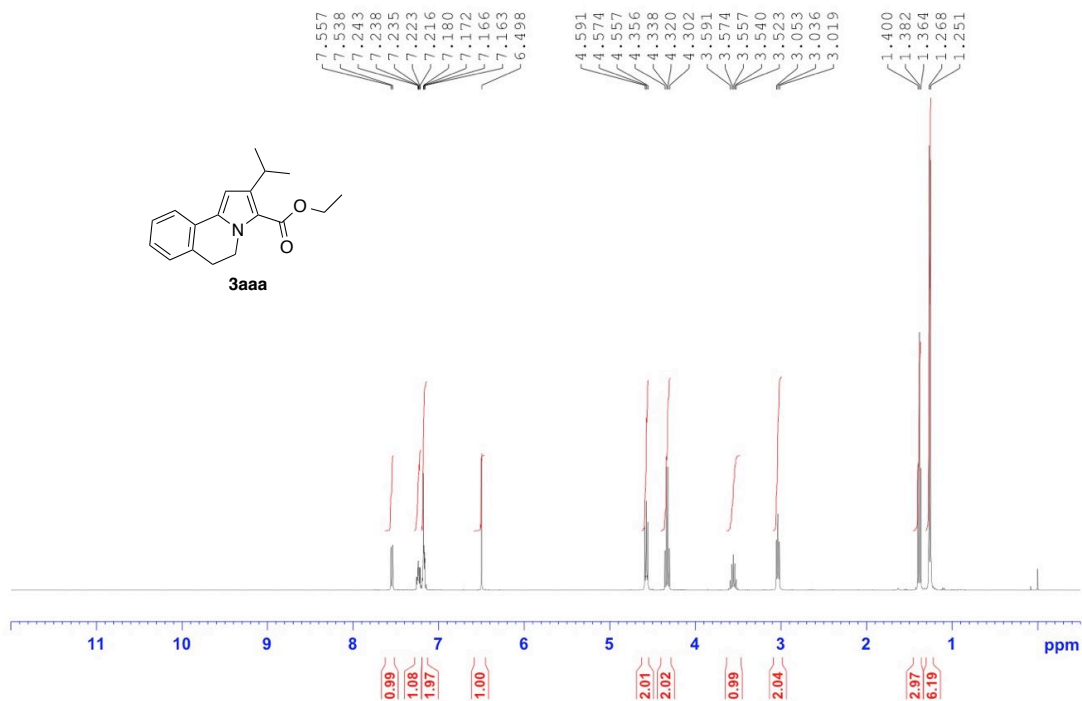

TWW-02-295, 13C, BBF01, CDC13

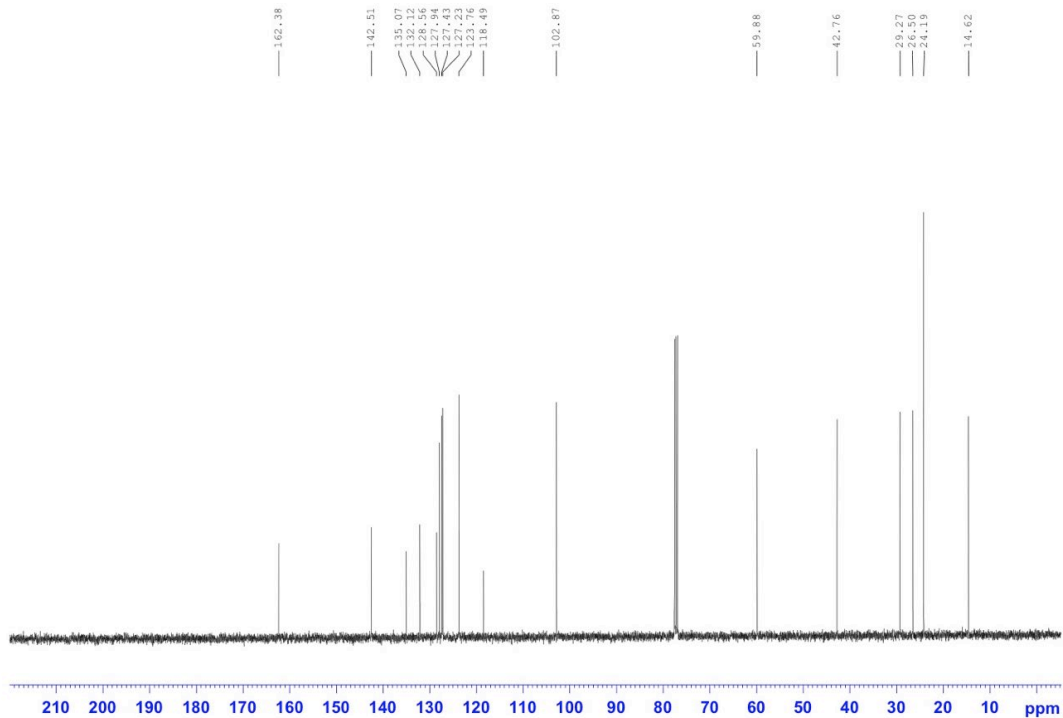

TWW-02-262-1, 1H, BBF01, CDC13

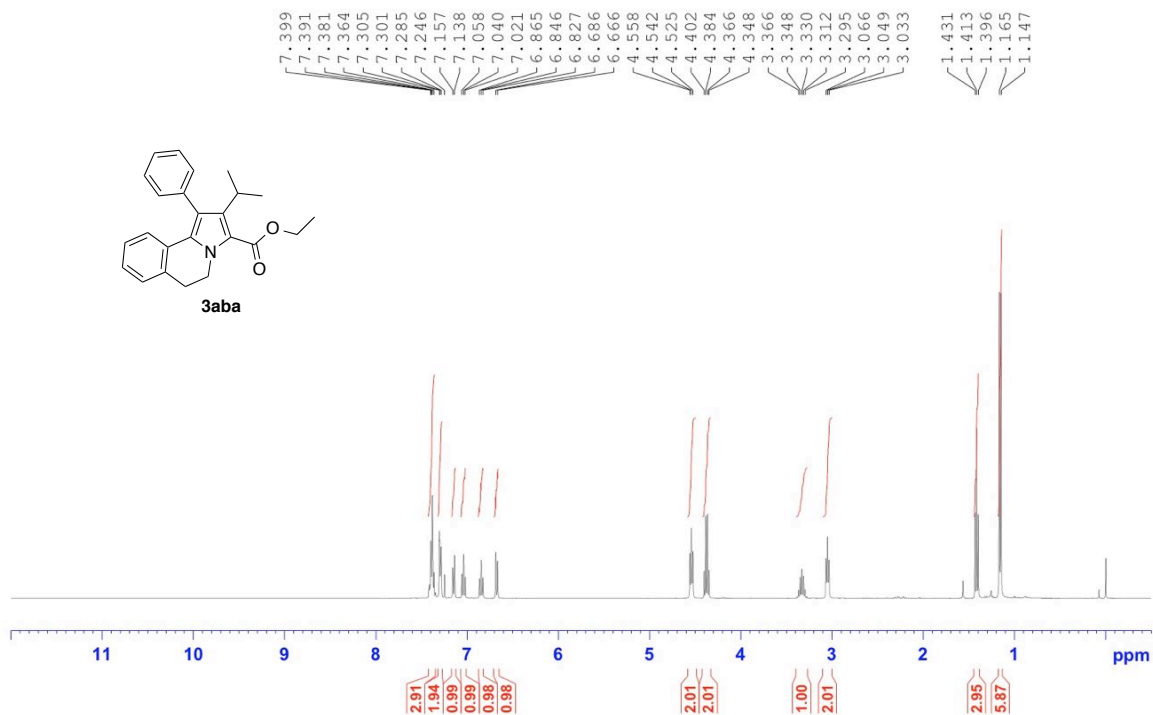

TWW-02-262-1, 13C, BBF01, CDC13

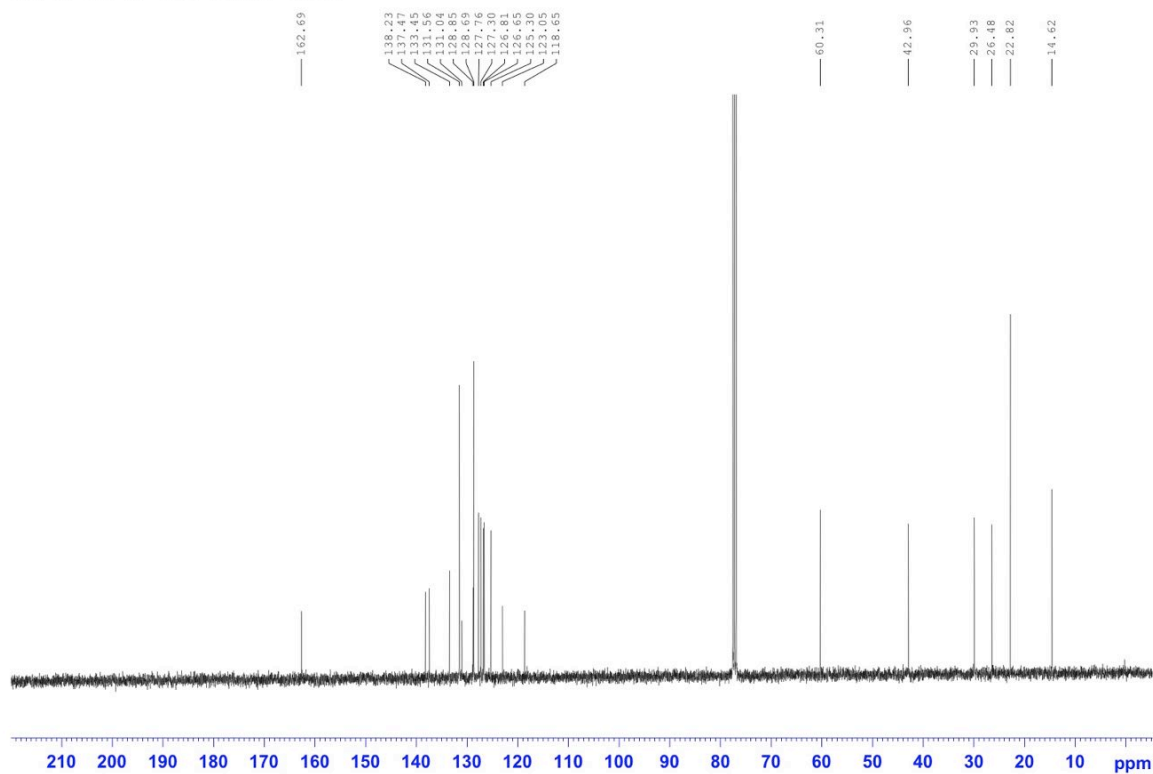

TWW-02-262-2 1H, BBF01, CDCl3

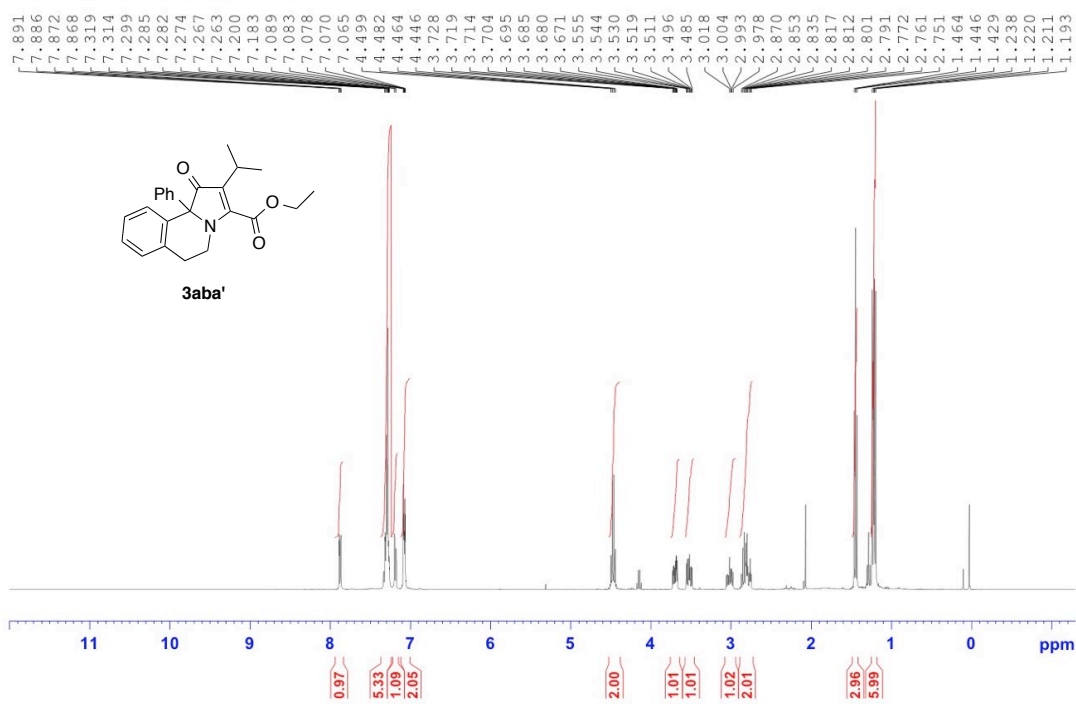

TWW-02-262-2 13C, BBF01, CDCl3

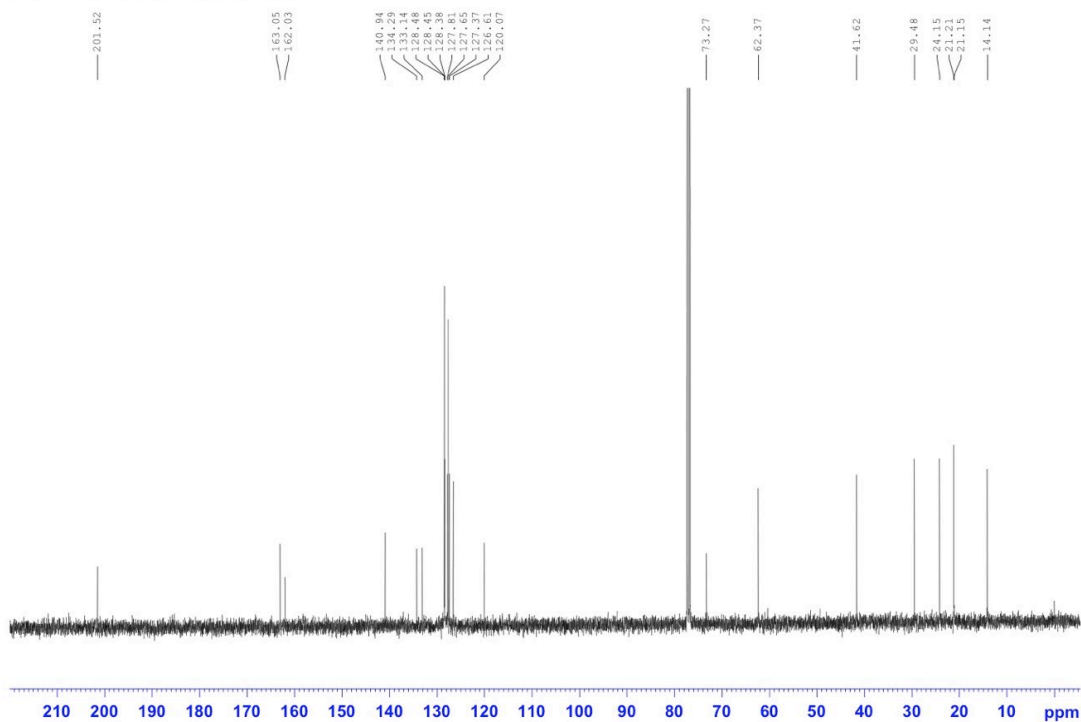

TWW-02-385-p, 1H, BBF01, CDC13

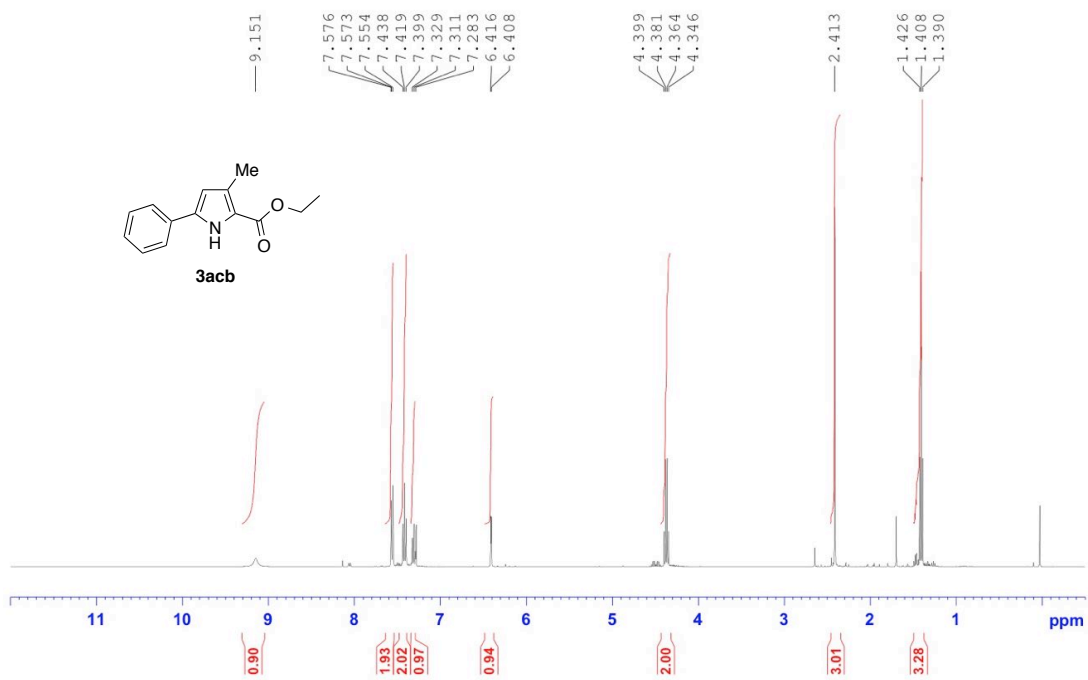

TWW-02-385-p, 13C, BBF01, CDC13

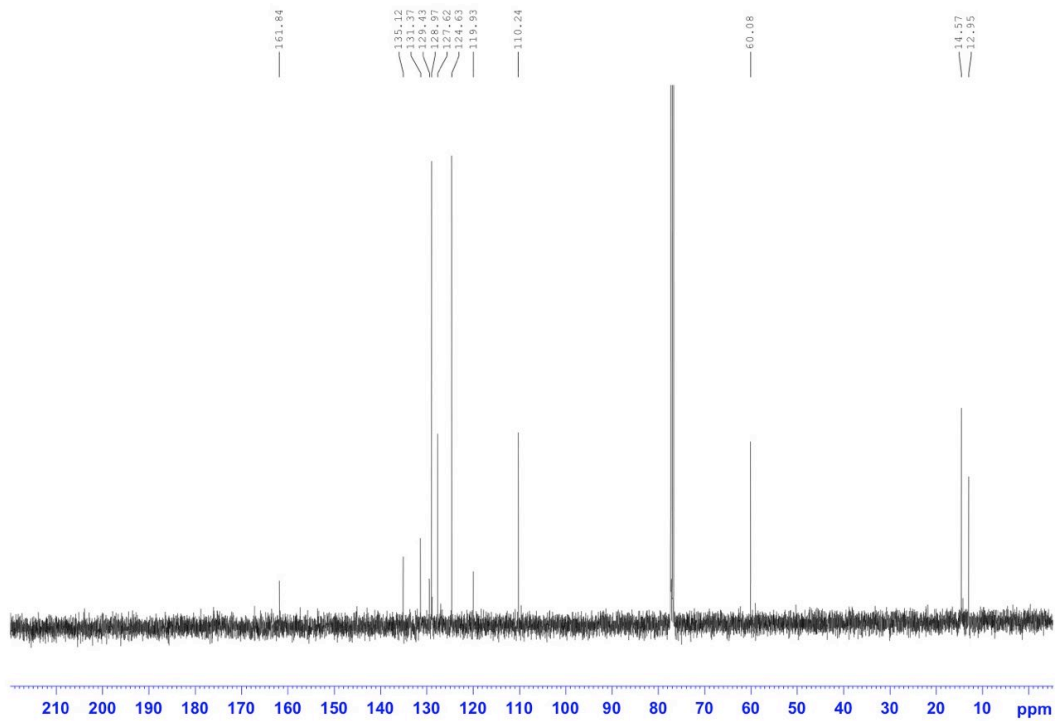



TWW-02-385, 1H, BBF01, CDCl3

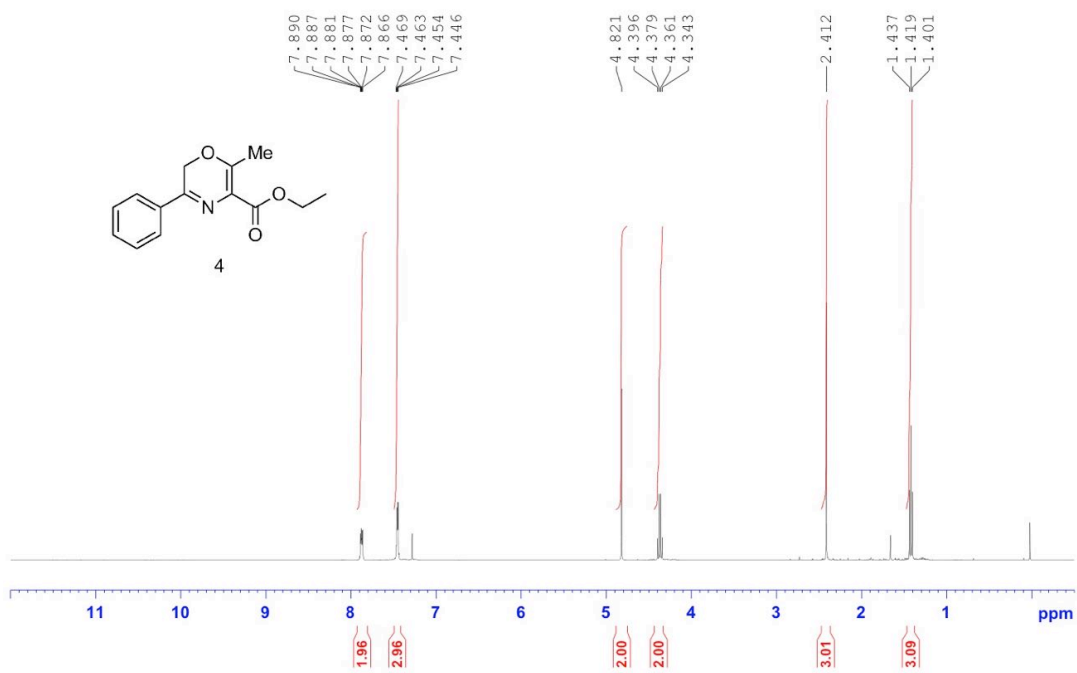

TWW-02-385, 13C, BBF01, CDCl3

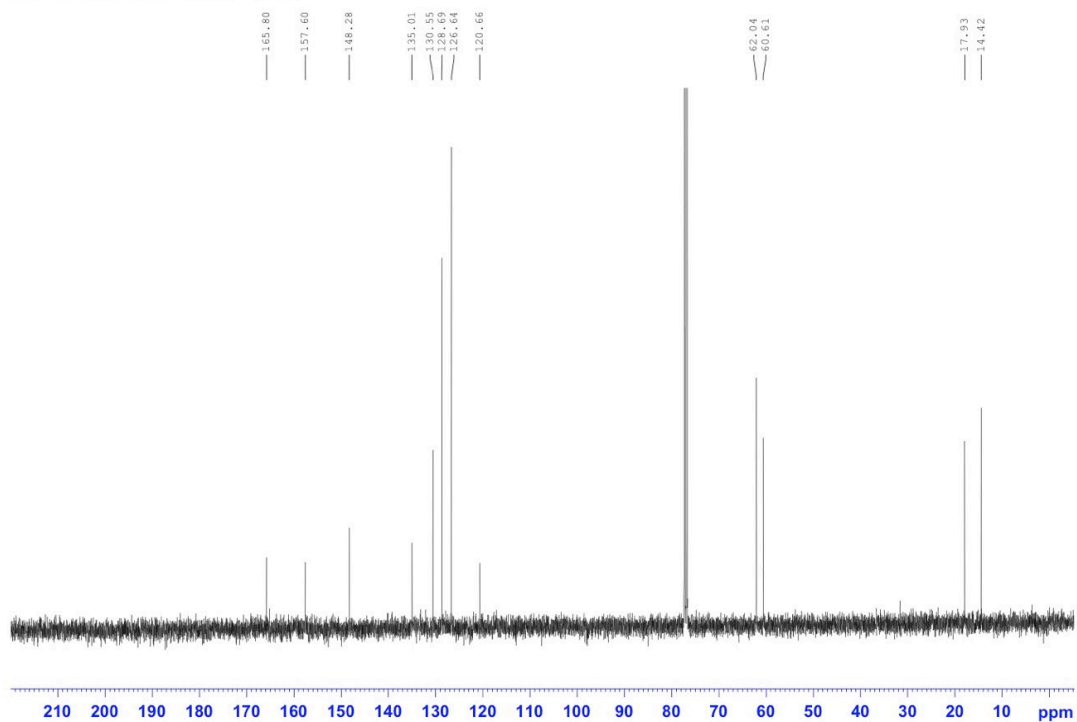

TWW-02-374-2, 1H, BBF01, CDC13

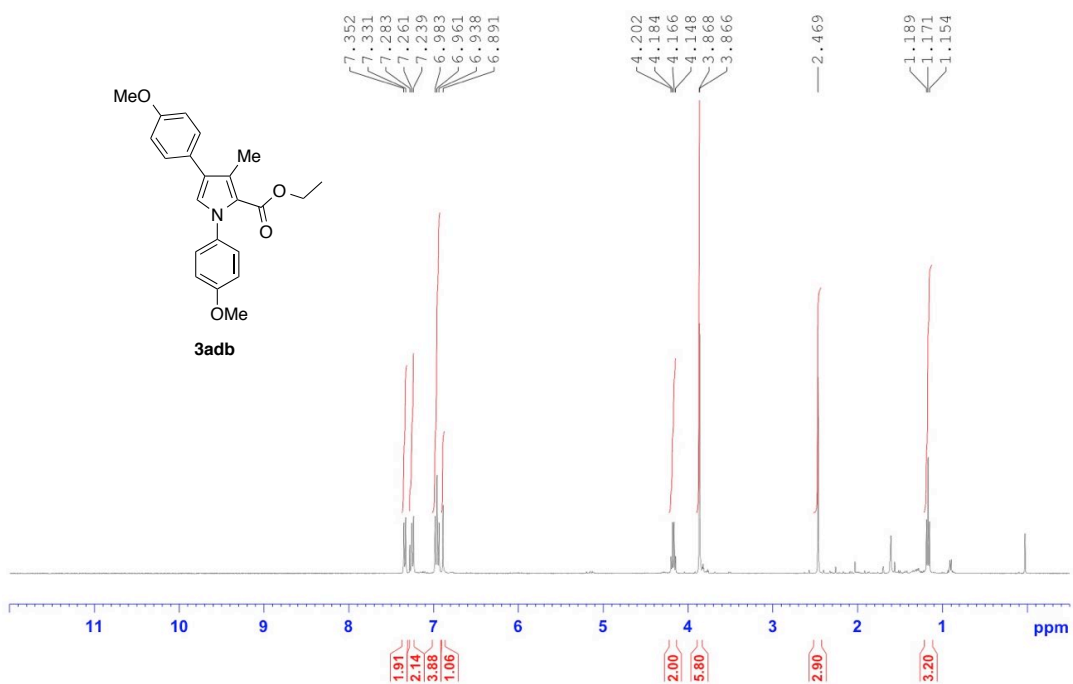

TWW-02-374-2, 13C, BBF01, CDC13

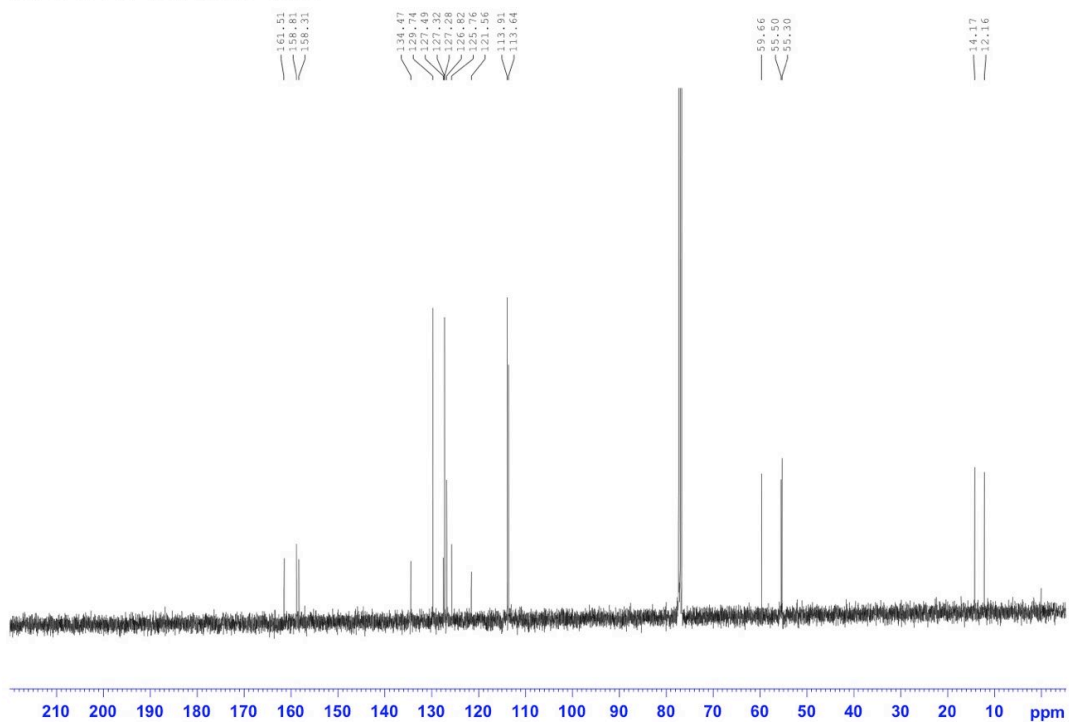

TWW-02-227, 1H, BBF01, CDCl3

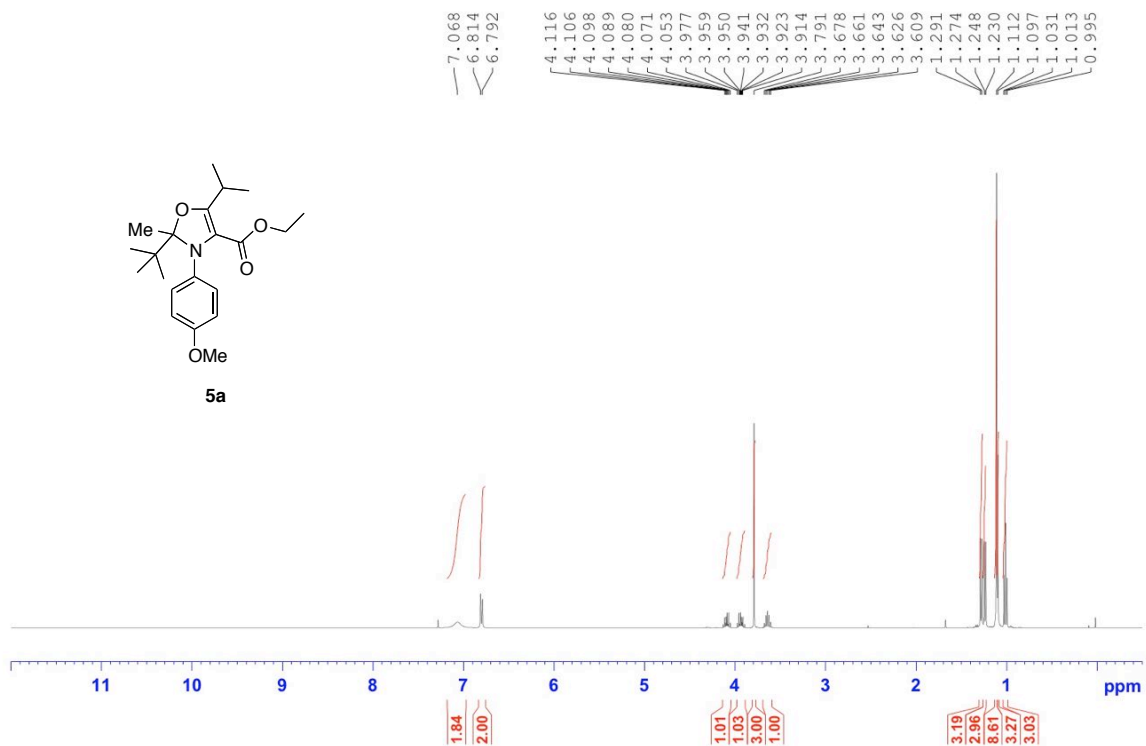

TWW-02-227, 13C, BBF01, CDCl3

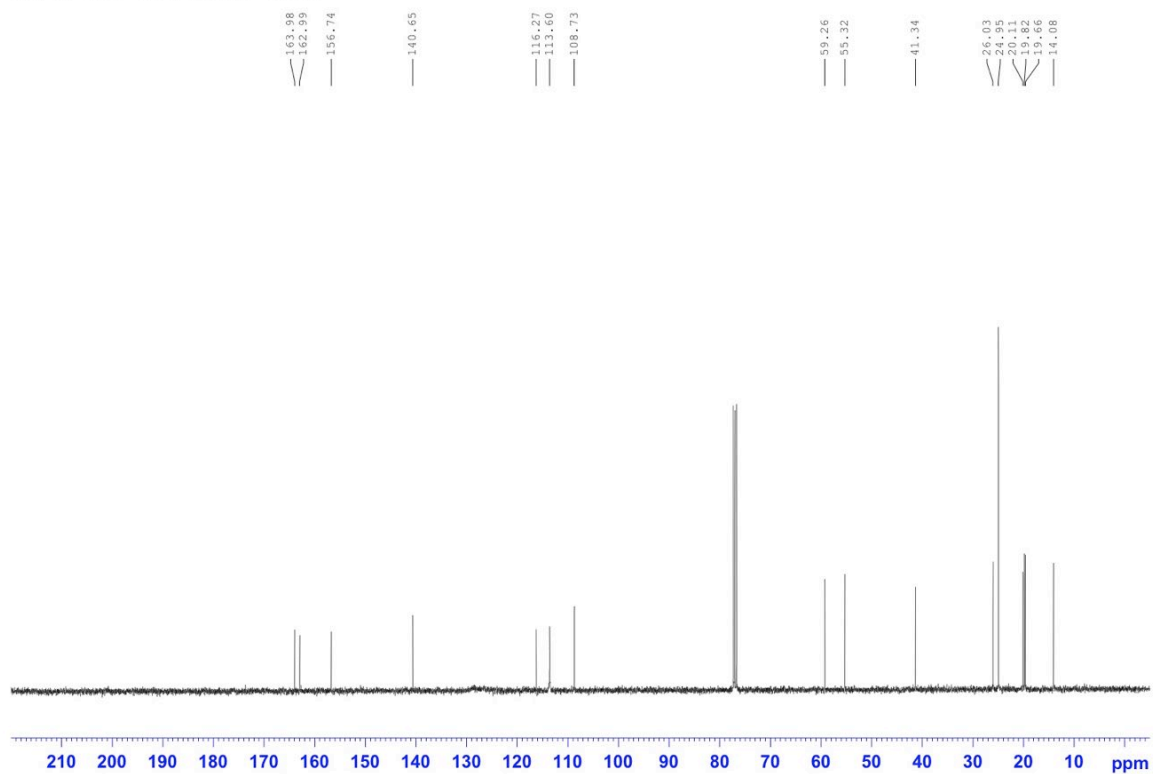

TWW-02-213, 1H, BBF01, CDC13

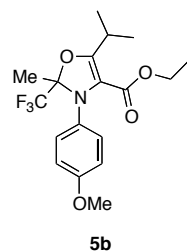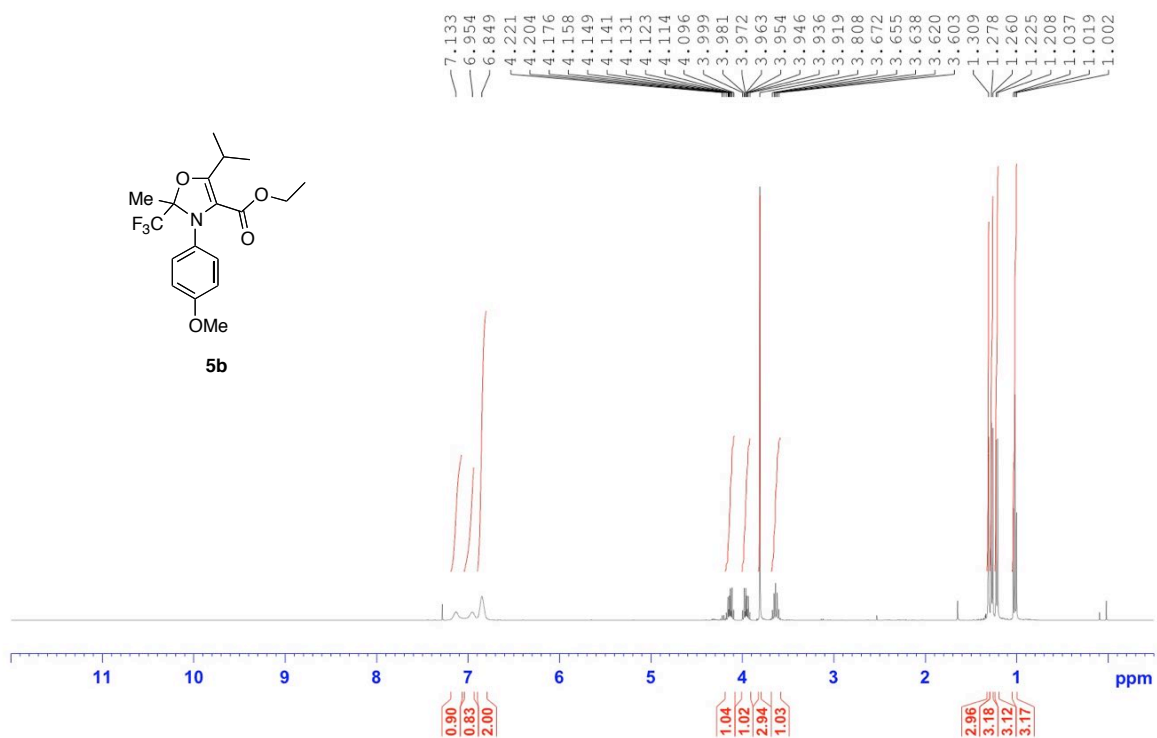

TWW-02-213-R BBF01 CDC13 13C

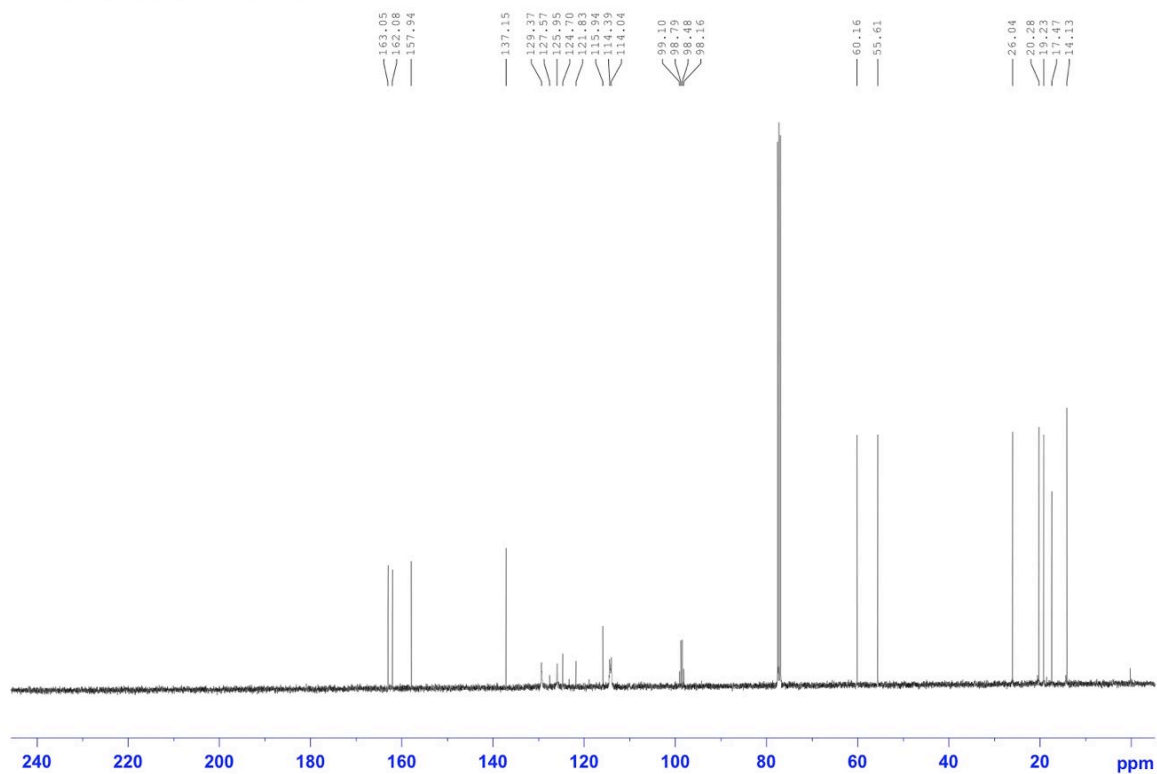

TWW-02-067, BBFO, 1H, CDC13

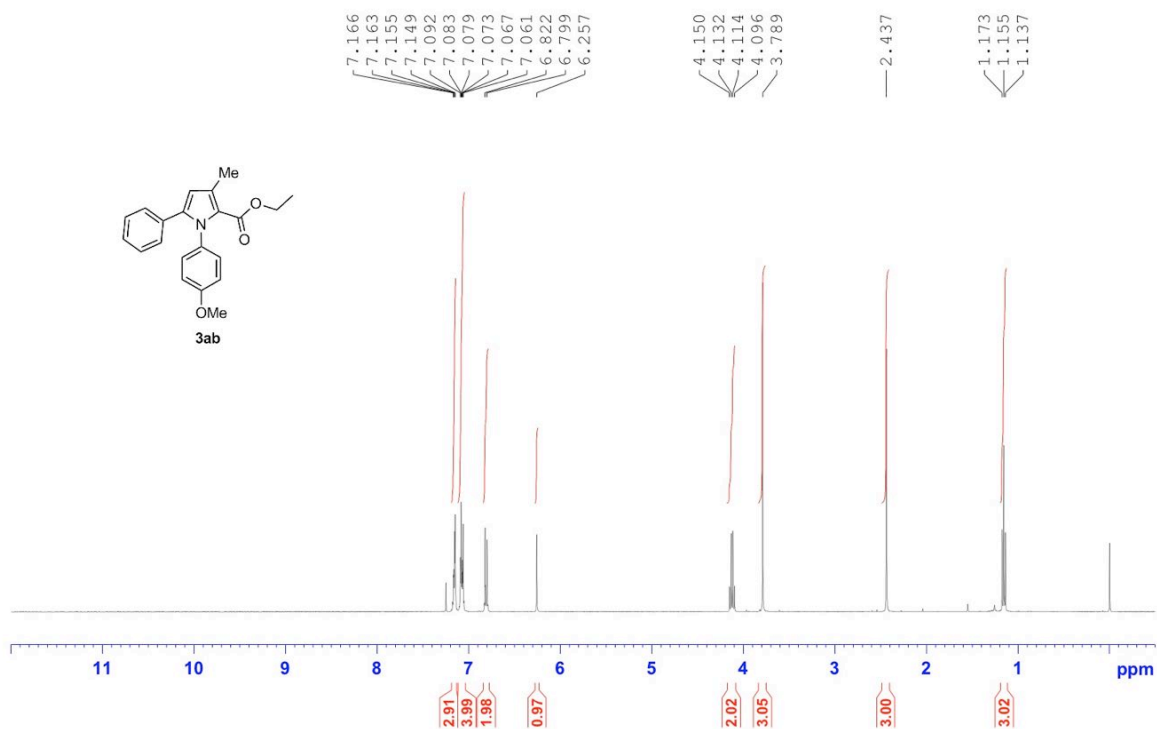

TWW-02-067, BBFO, 13C, CDC13

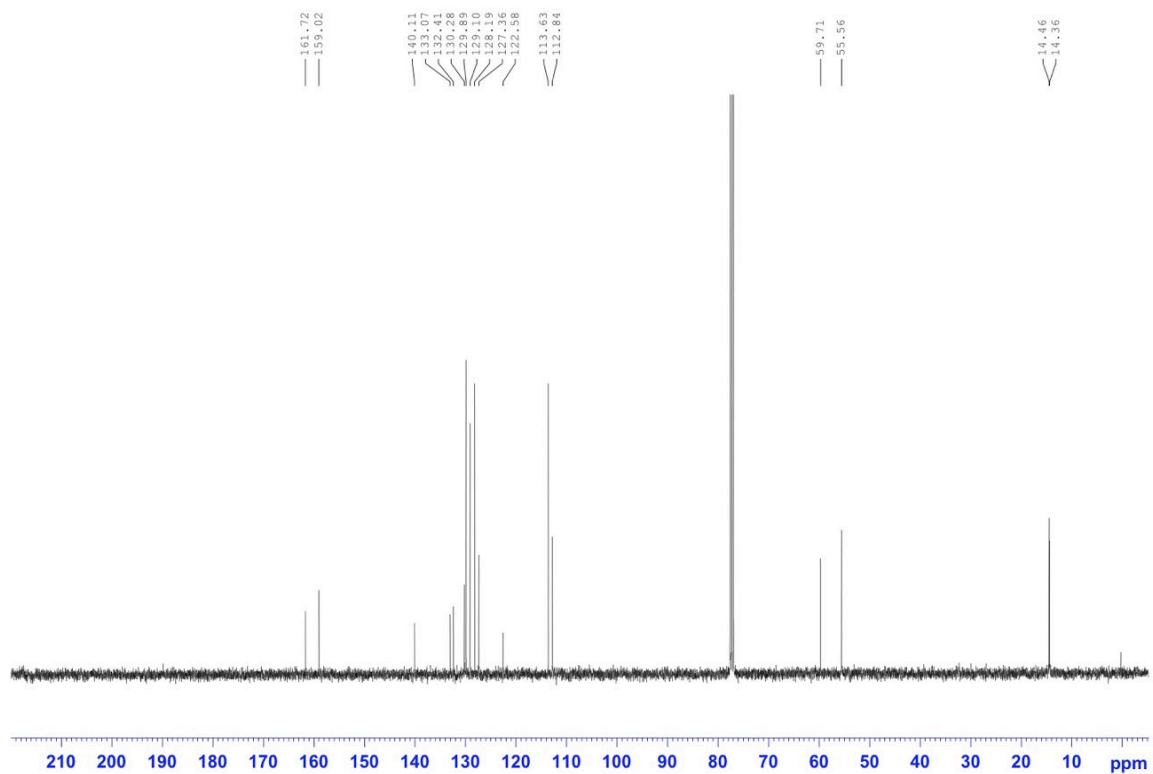

TWW-02-200, 1H BBF01, CDC13

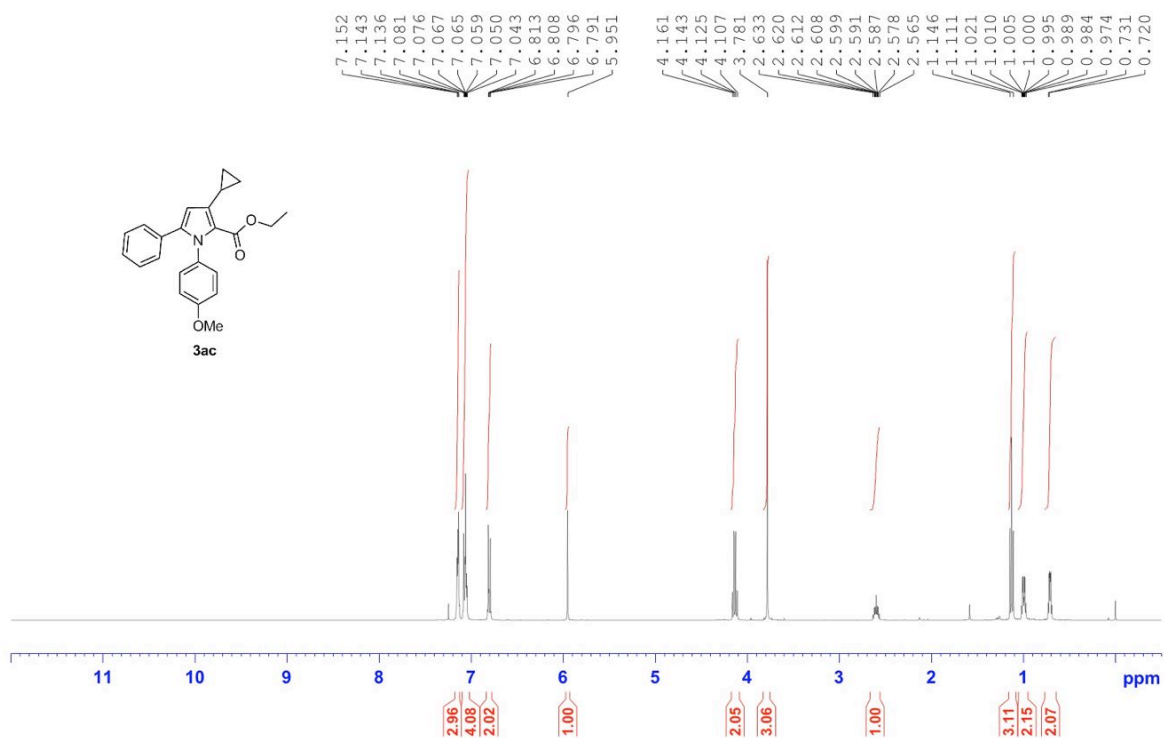

TWW-02-200, 13C BBF01, CDC13

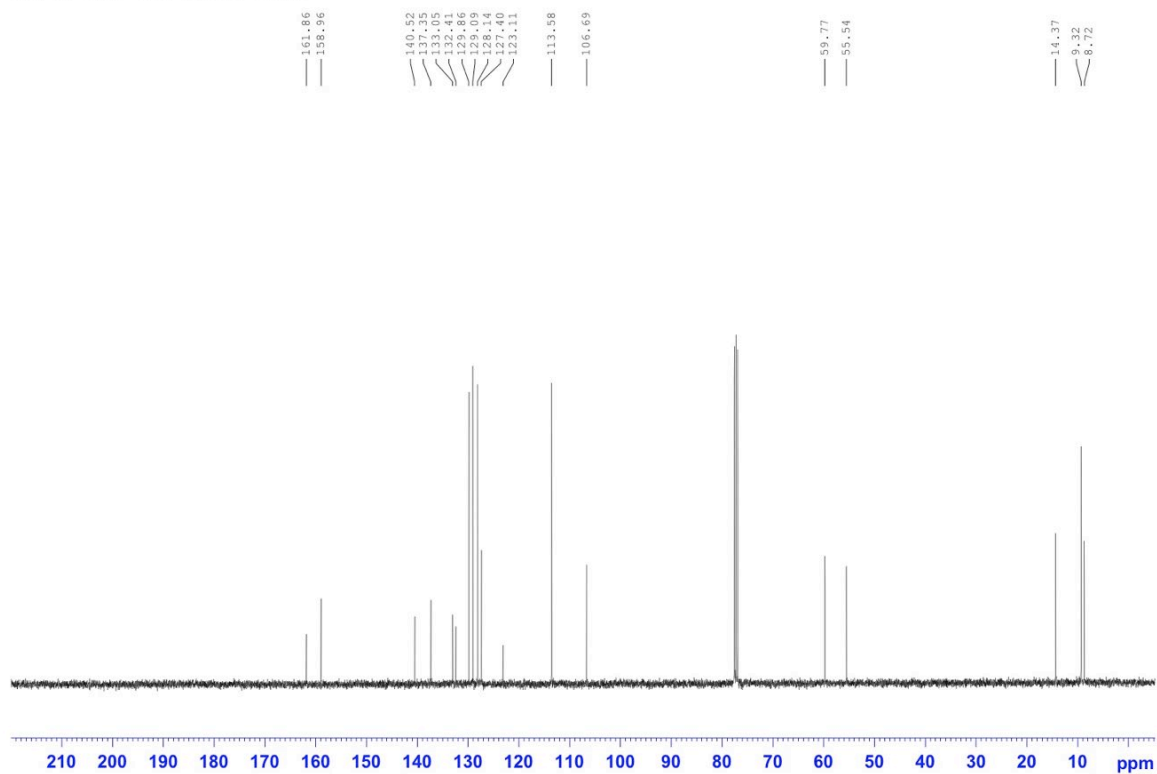

TWW-02-203, 1H, BBF01, CDC13

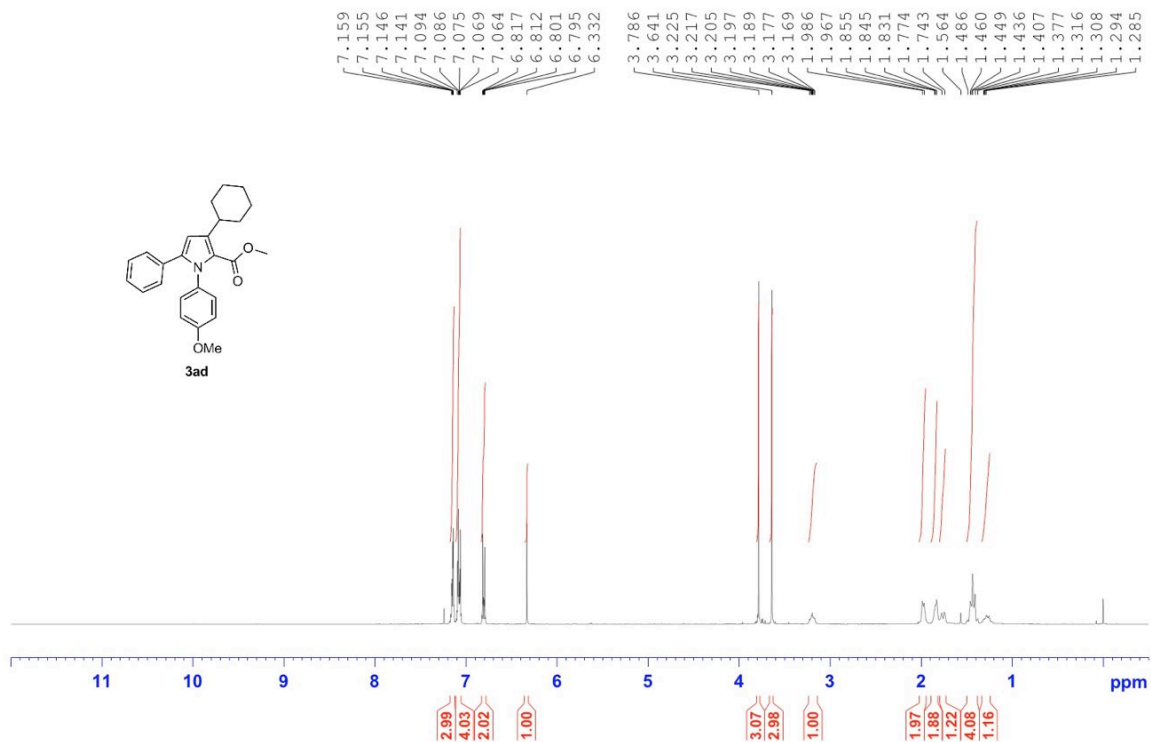

TWW-02-203, 13C, BBF01, CDC13

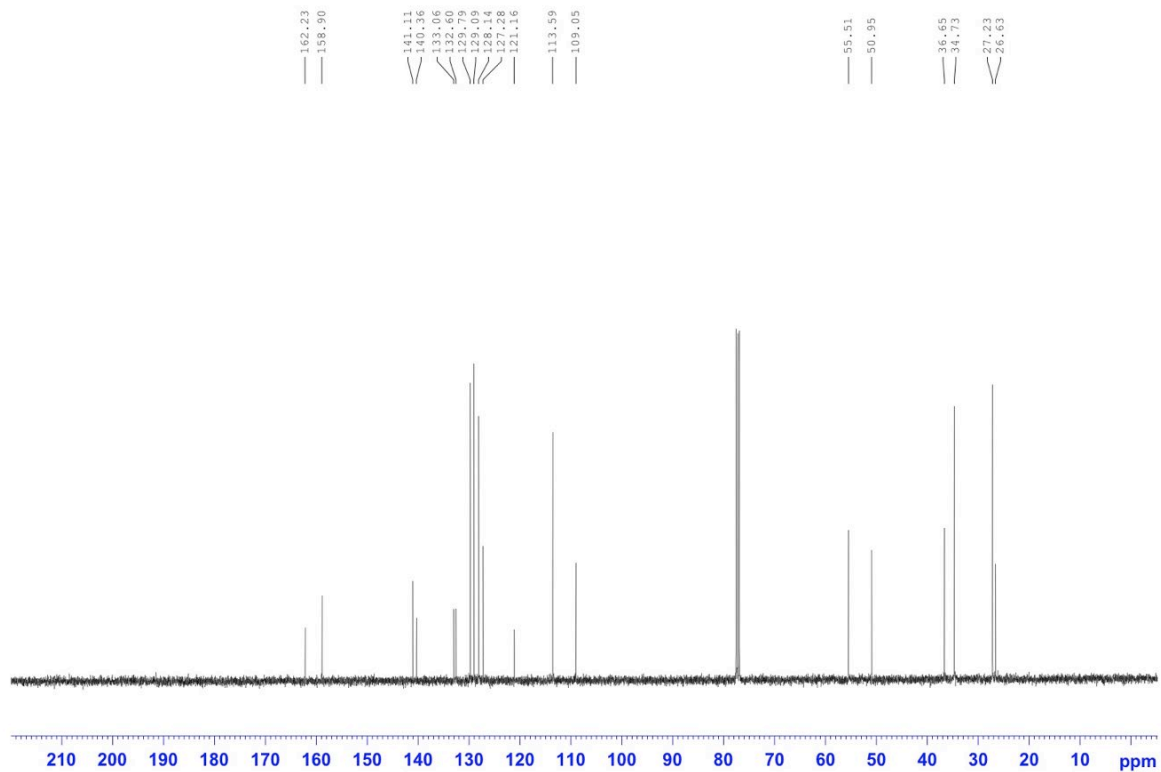

TWW-02-182, 1H BBF01, CDC13

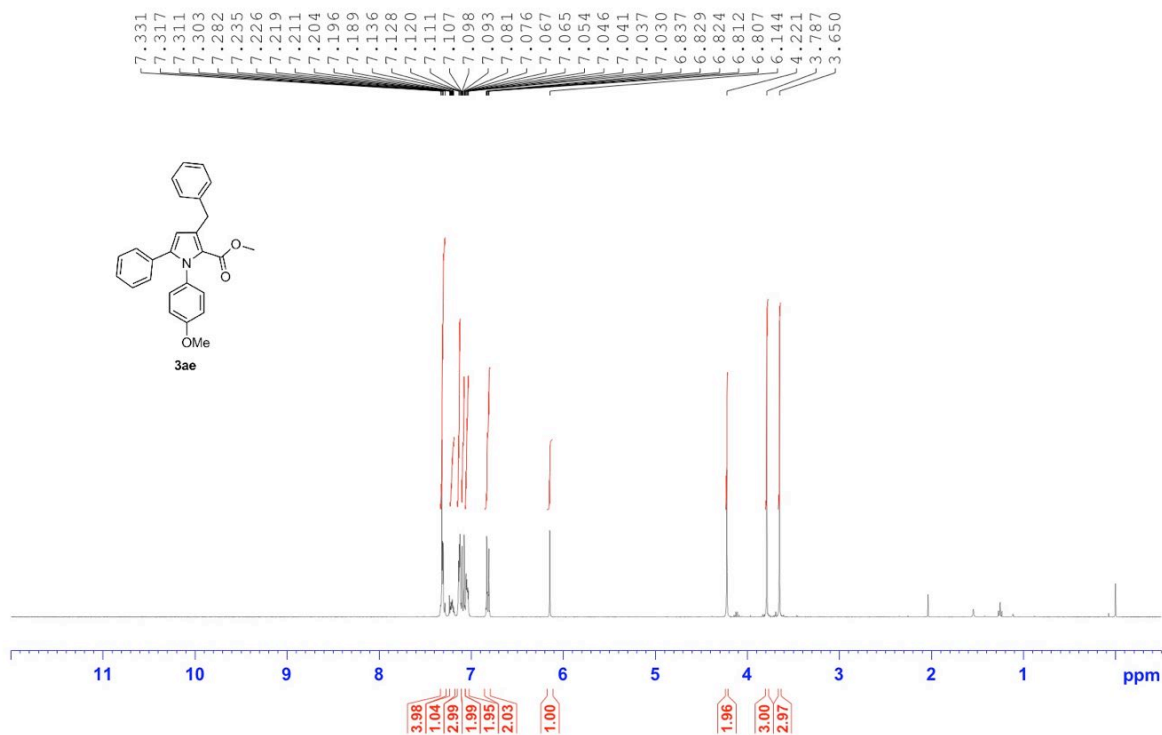

TWW-02-182, 13C BBF01, CDC13

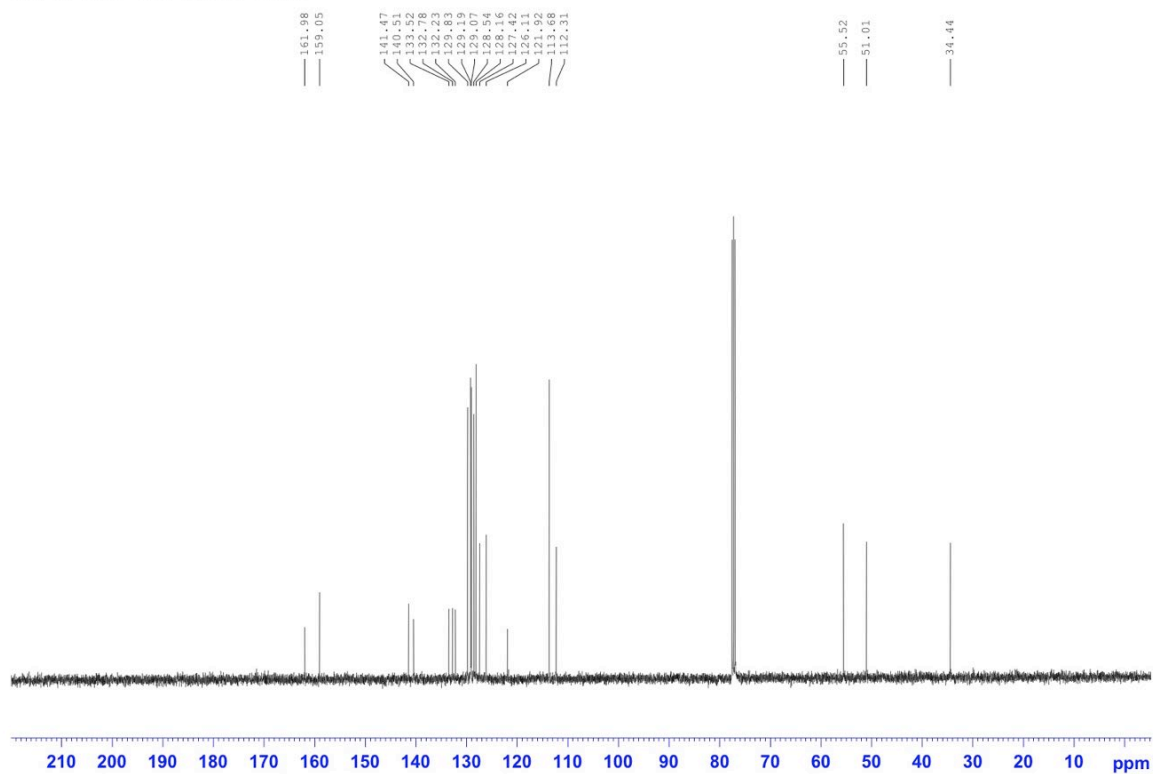



TWW-02-057, BBFO, 1H, CDC13

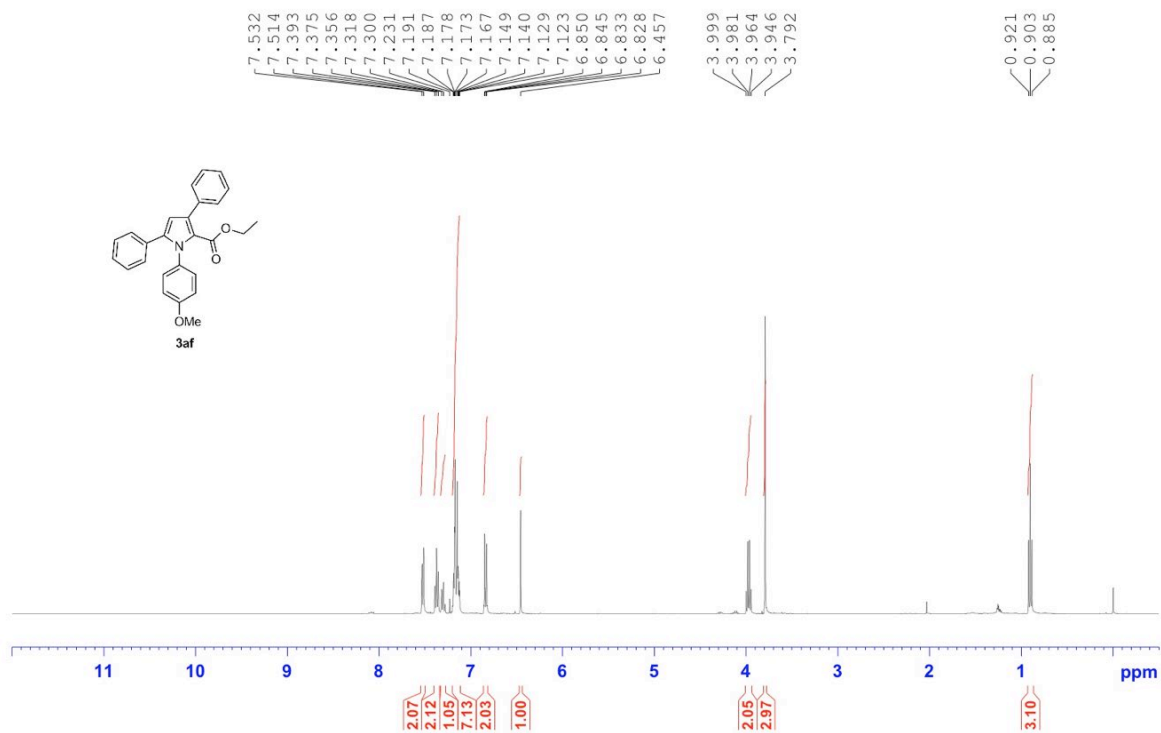

TWW-02-057, BBFO, 13C, CDC13

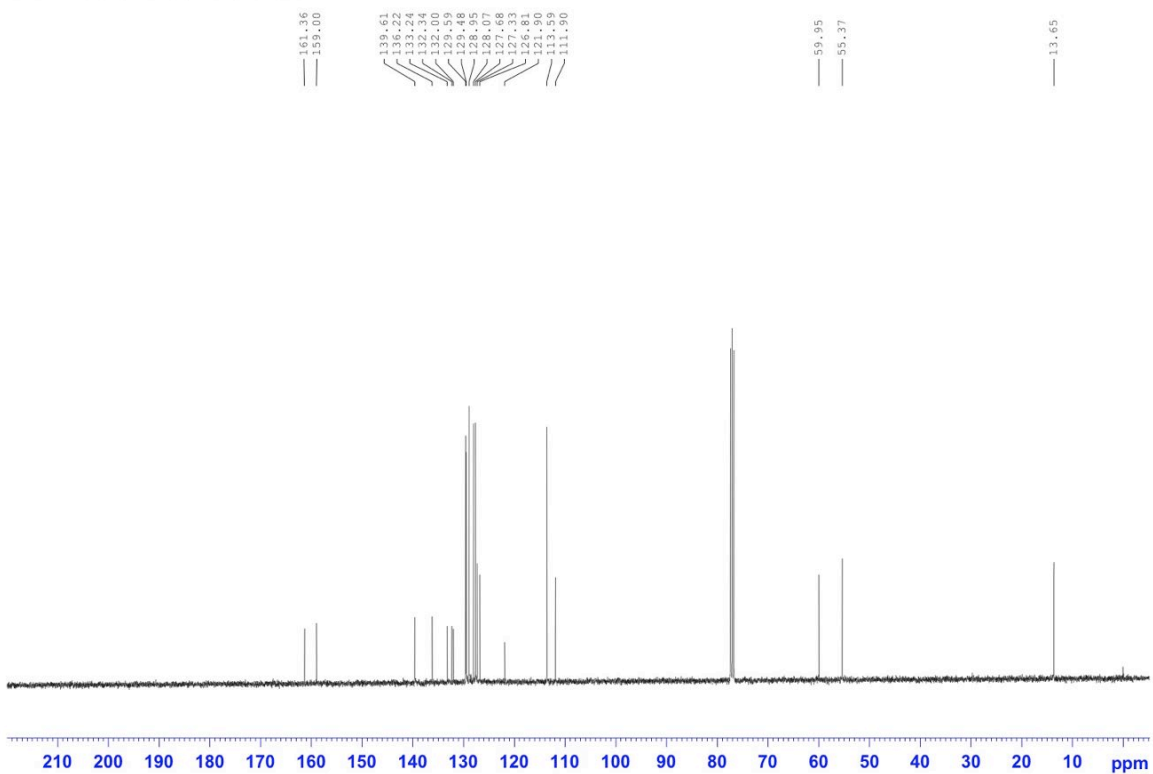

TWW-02-174, 1H BBF01, CDC13

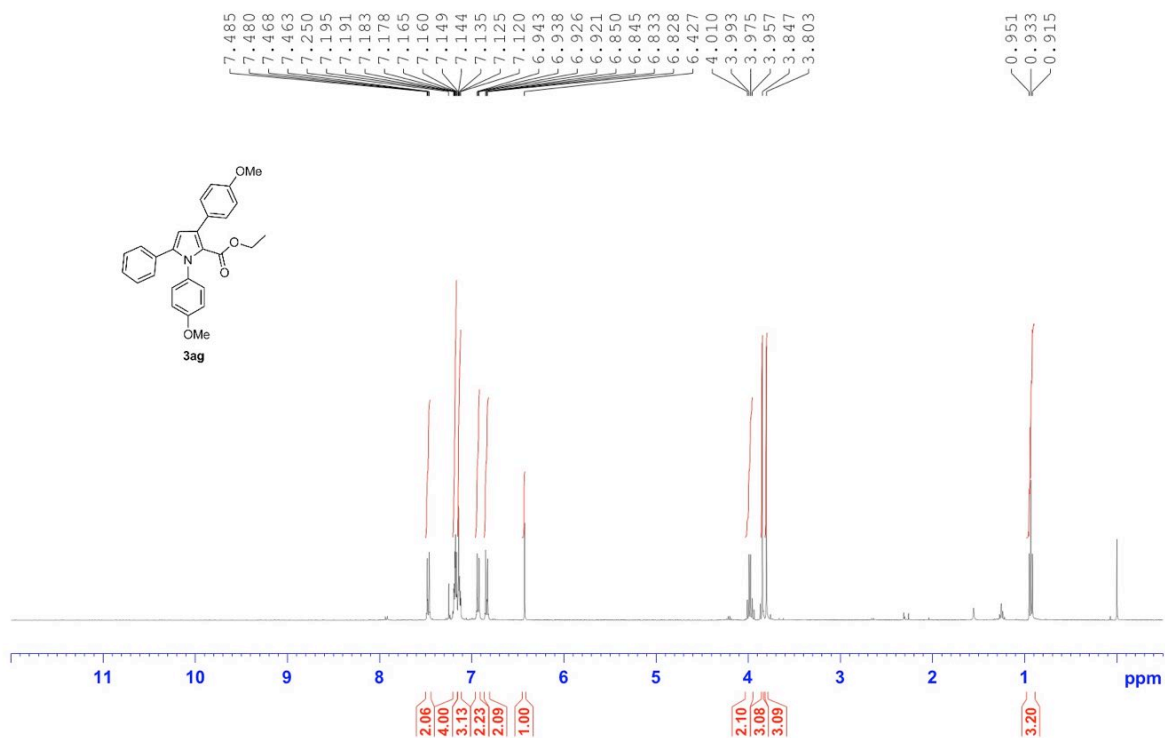

TWW-02-174, 13C BBF01, CDC13

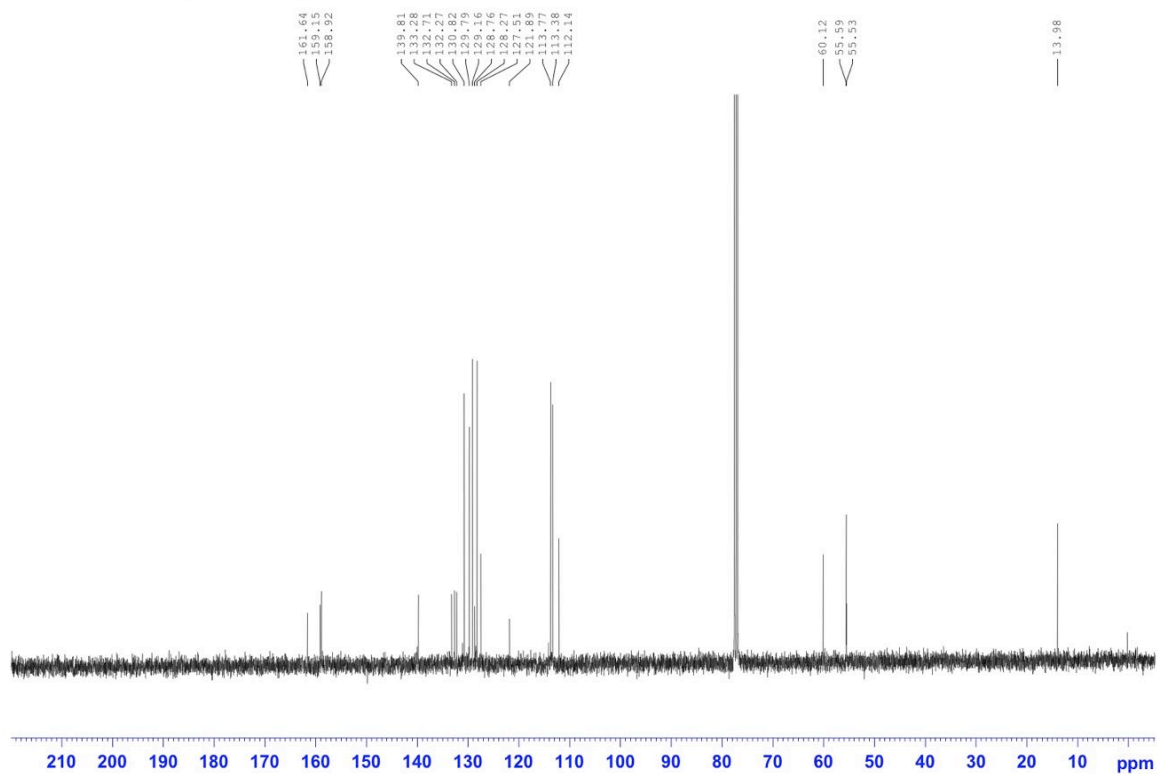

TWW-02-202, 1H, BBF01, CDC13

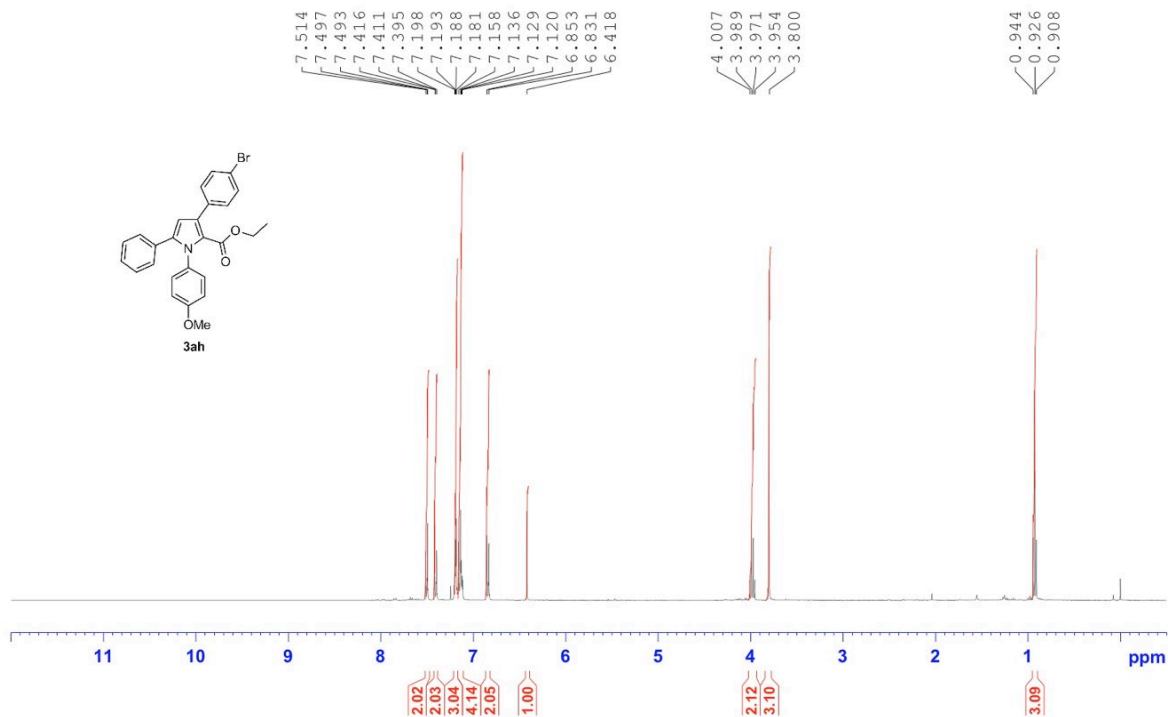

TWW-02-202, 13C, BBF01, CDC13

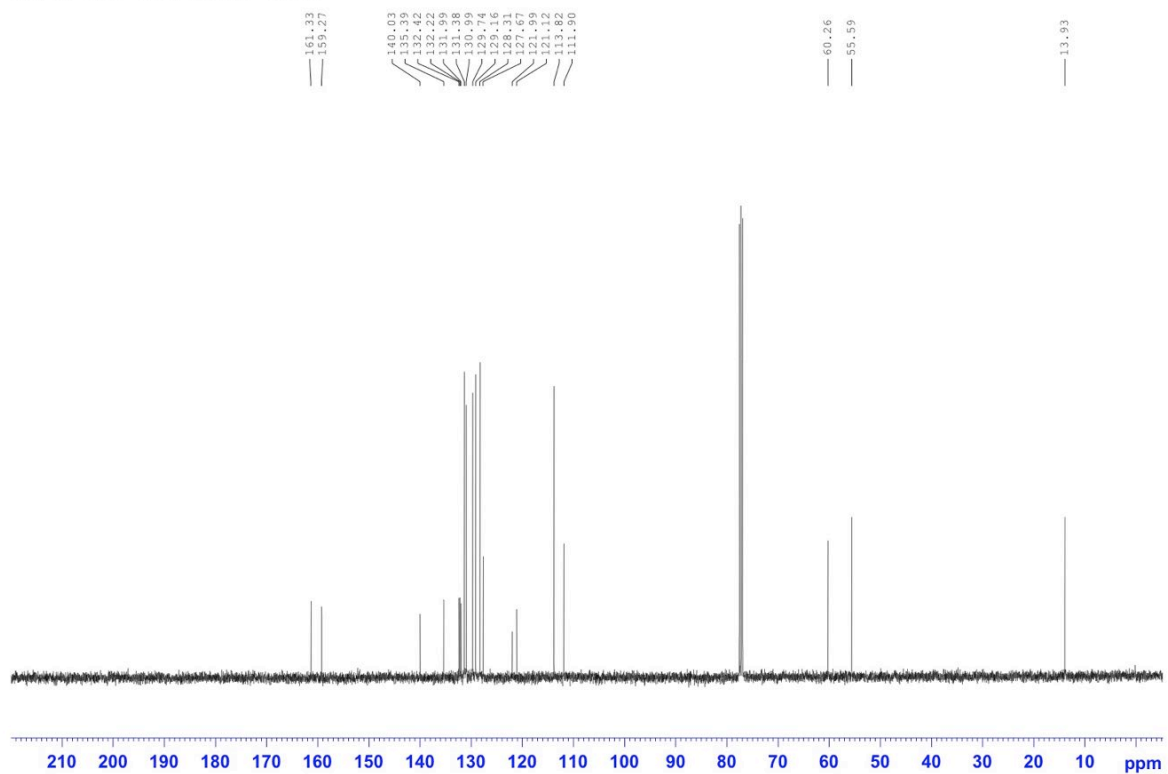

TWW-02-175, 1H BBF01, CDC13

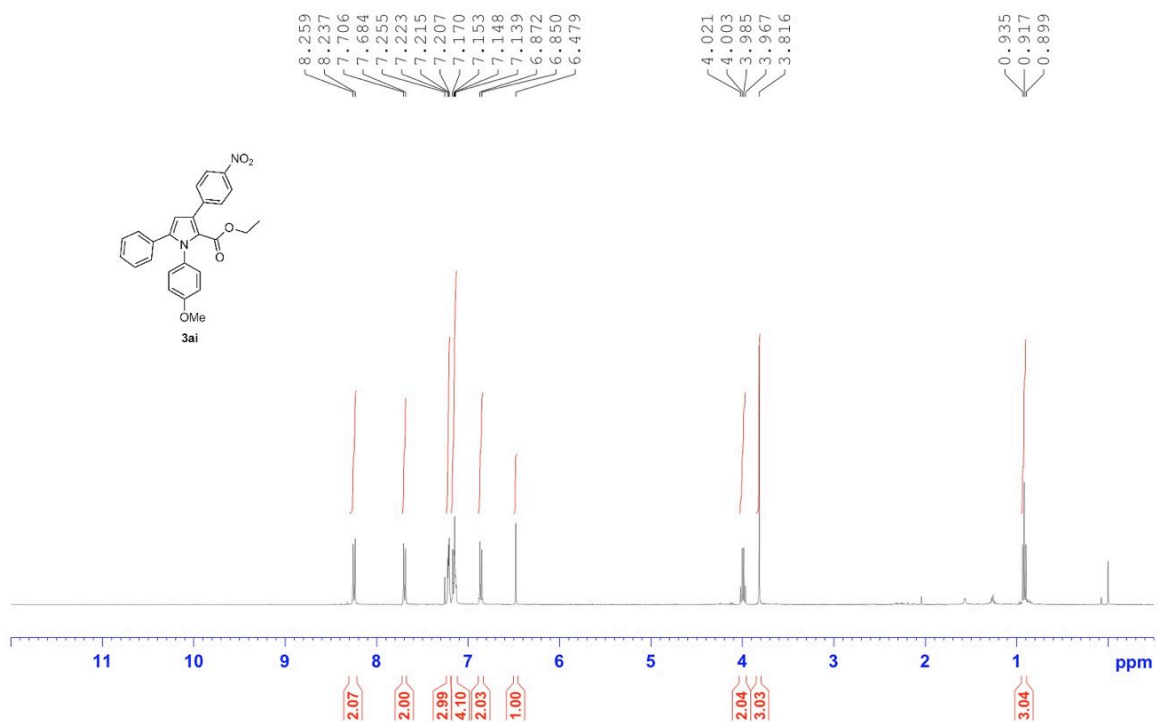

TWW-02-175, 13C BBF01, CDC13

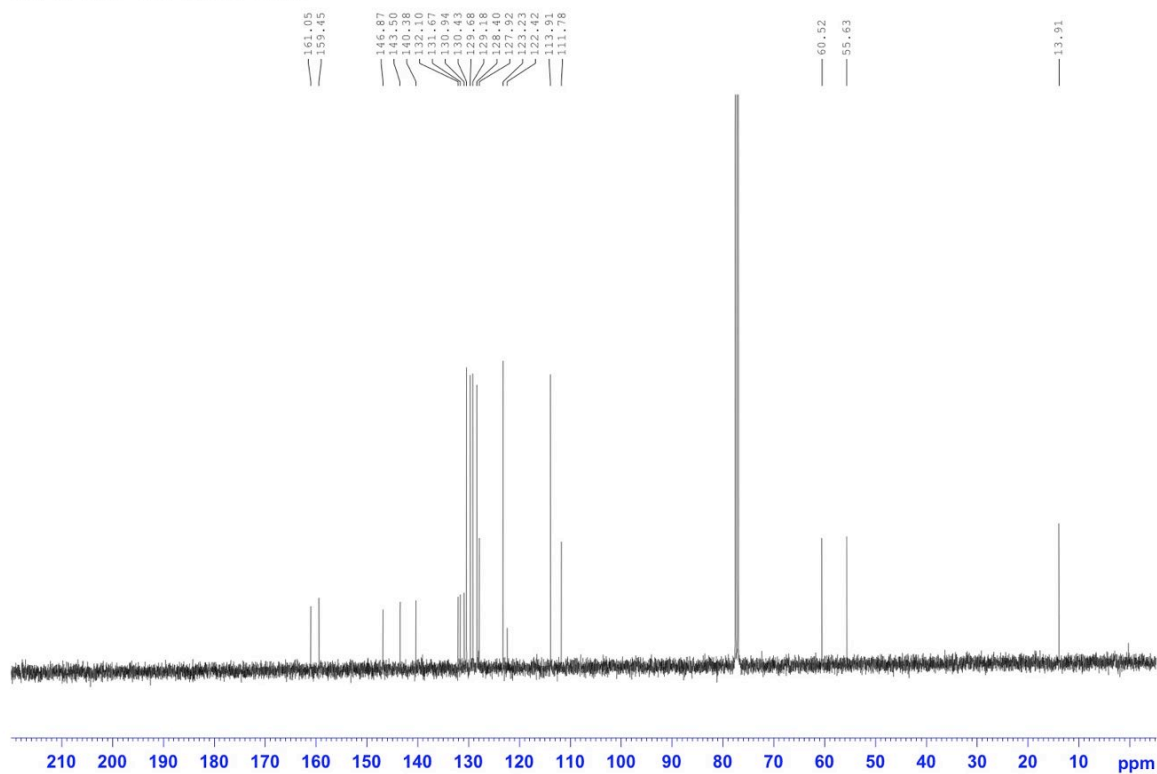

TWW-02-201, 1H, BBF01, CDC13

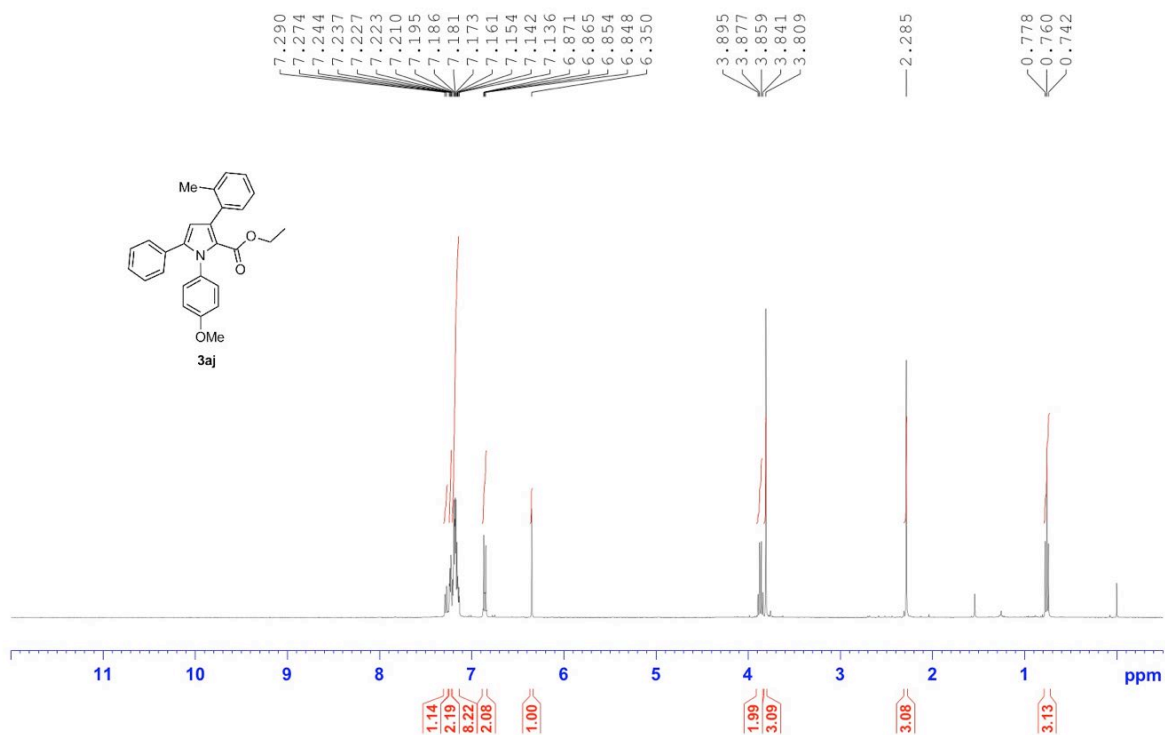

TWW-02-201, 13C, BBF01, CDC13

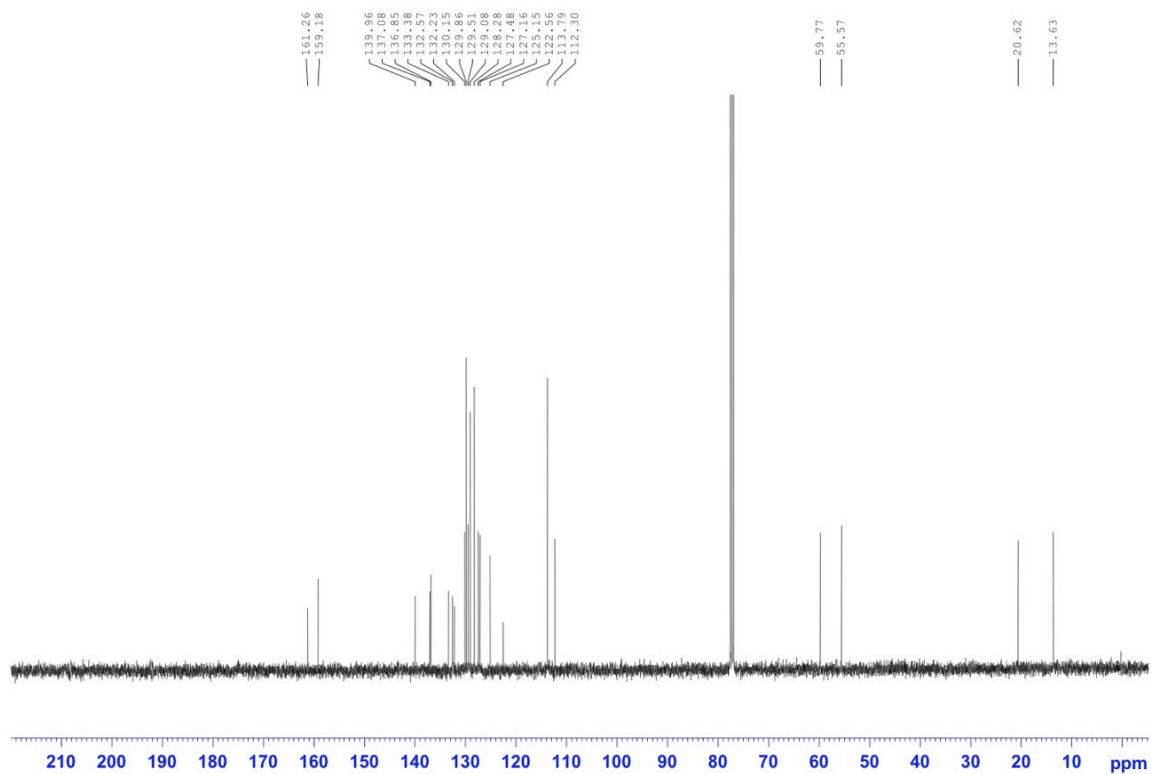

TWW-02-211, 1H, BBFO1, CDC13

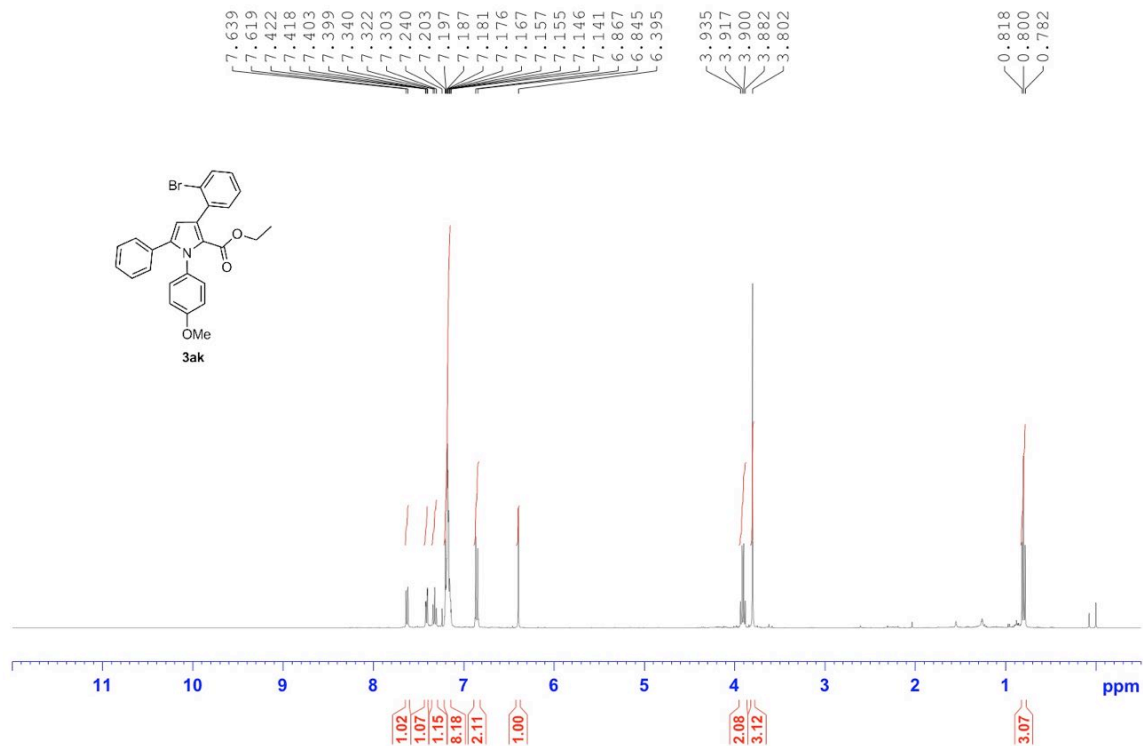

TWW-02-211, 13C, BBFO1, CDC13

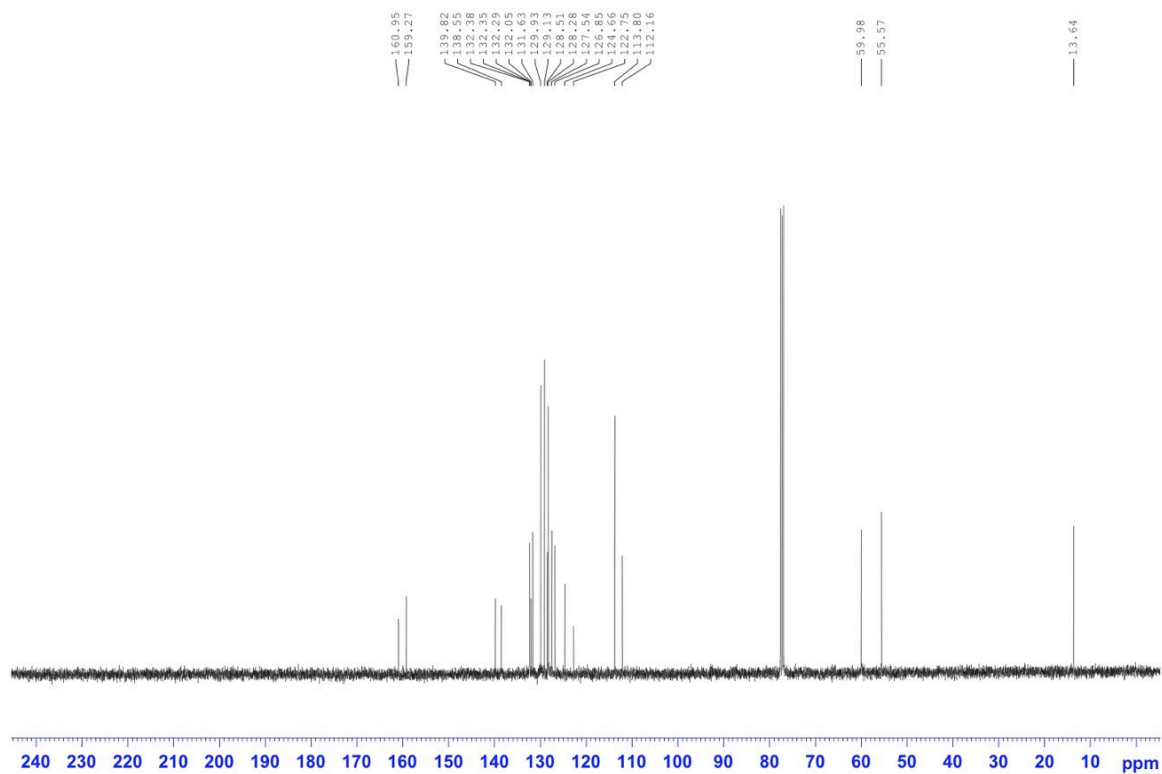

TWW-02-210, 1H, BBF01, CDC13

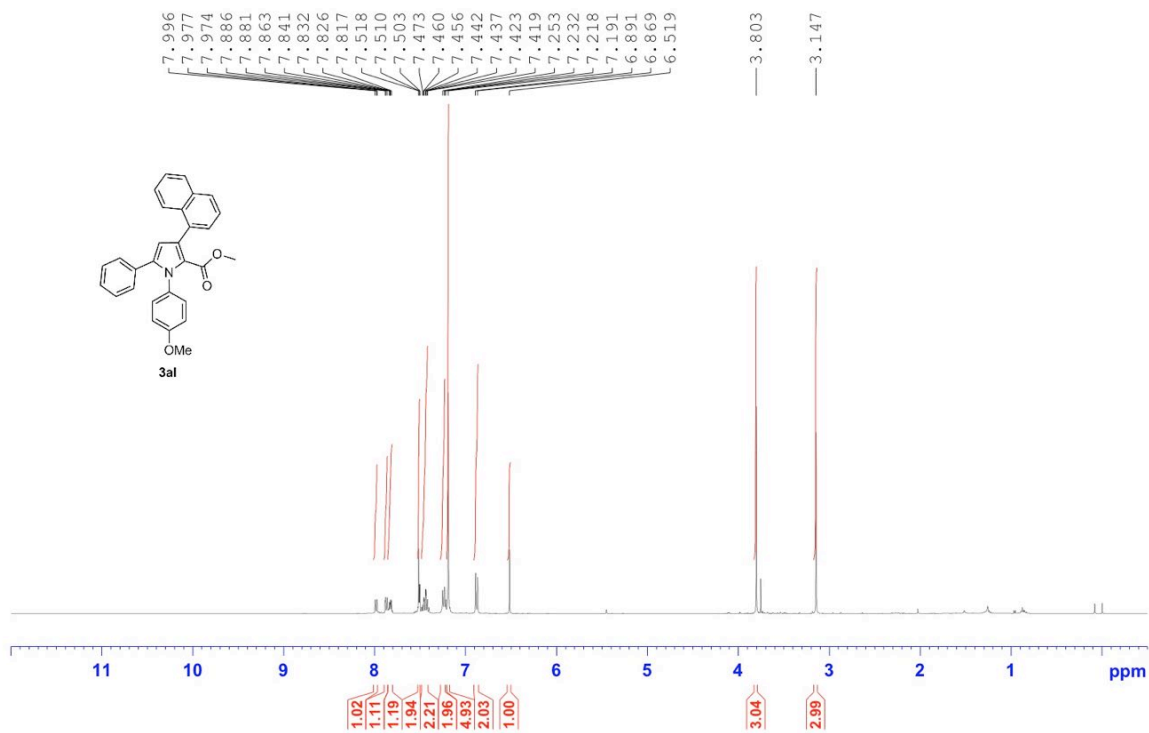

TWW-02-210-1, 13C NMR, 400M Hz, BBF02

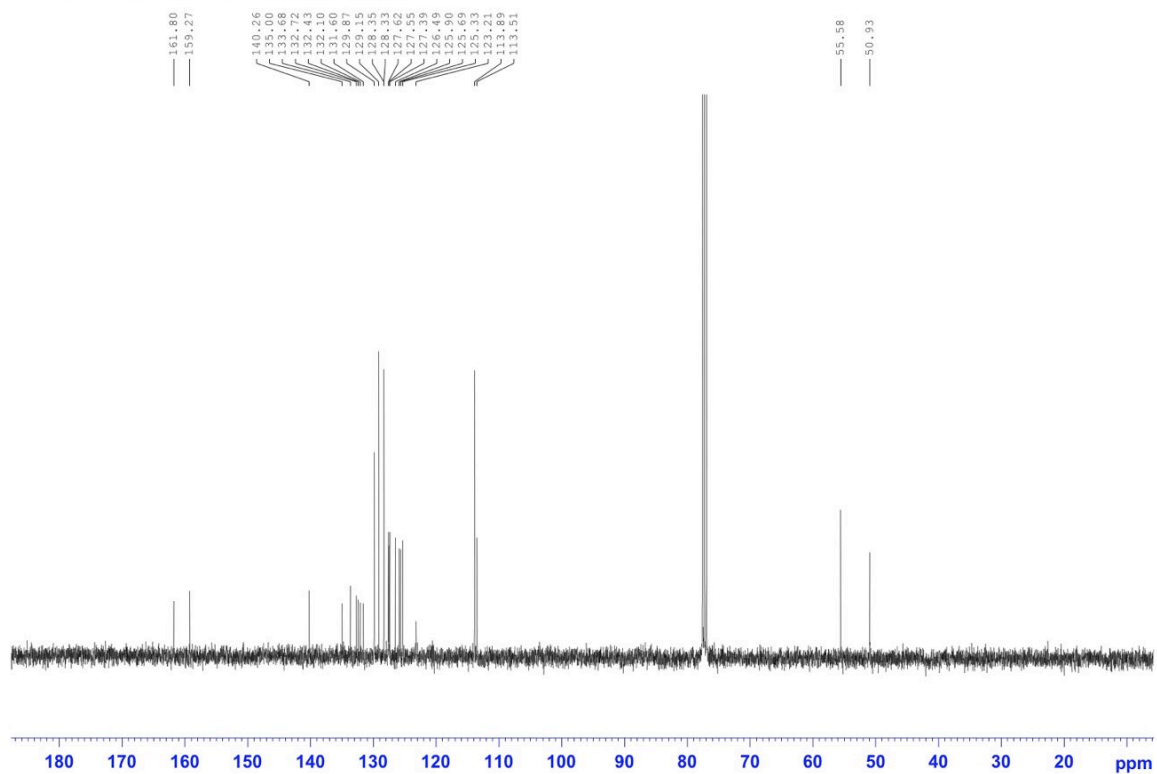

TWW-02-176, 1H BBF01, CDC13

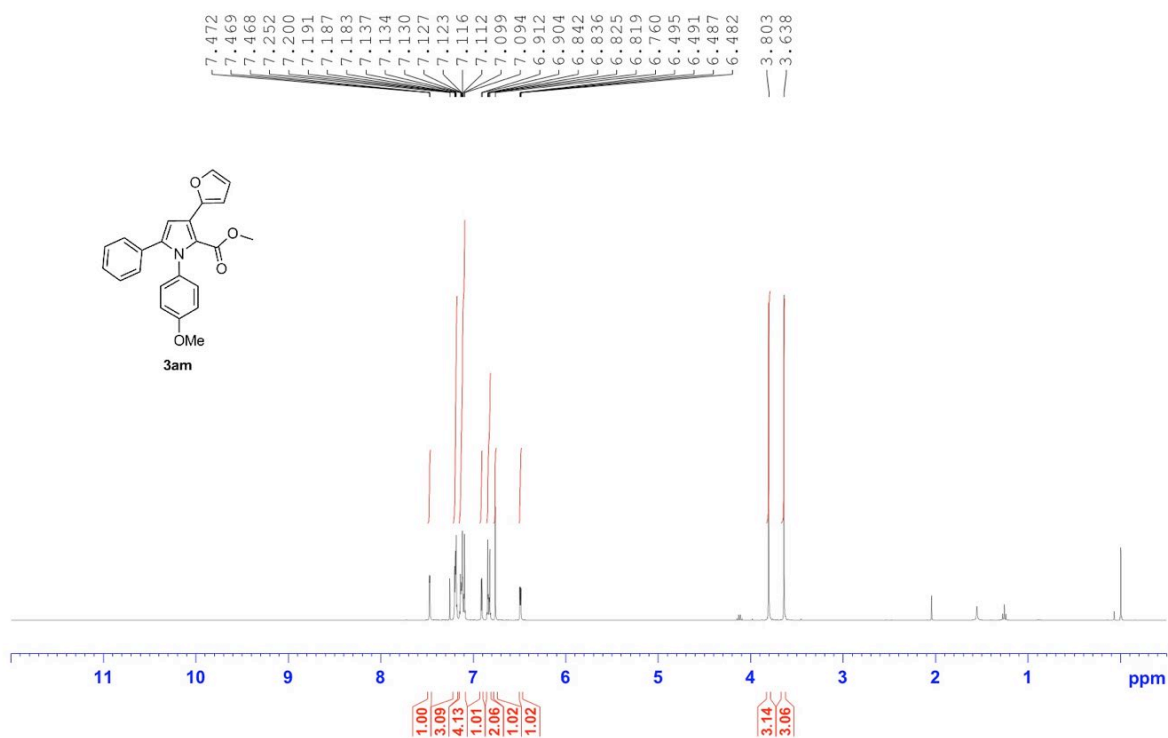

TWW-02-176, 13C BBF01, CDC13

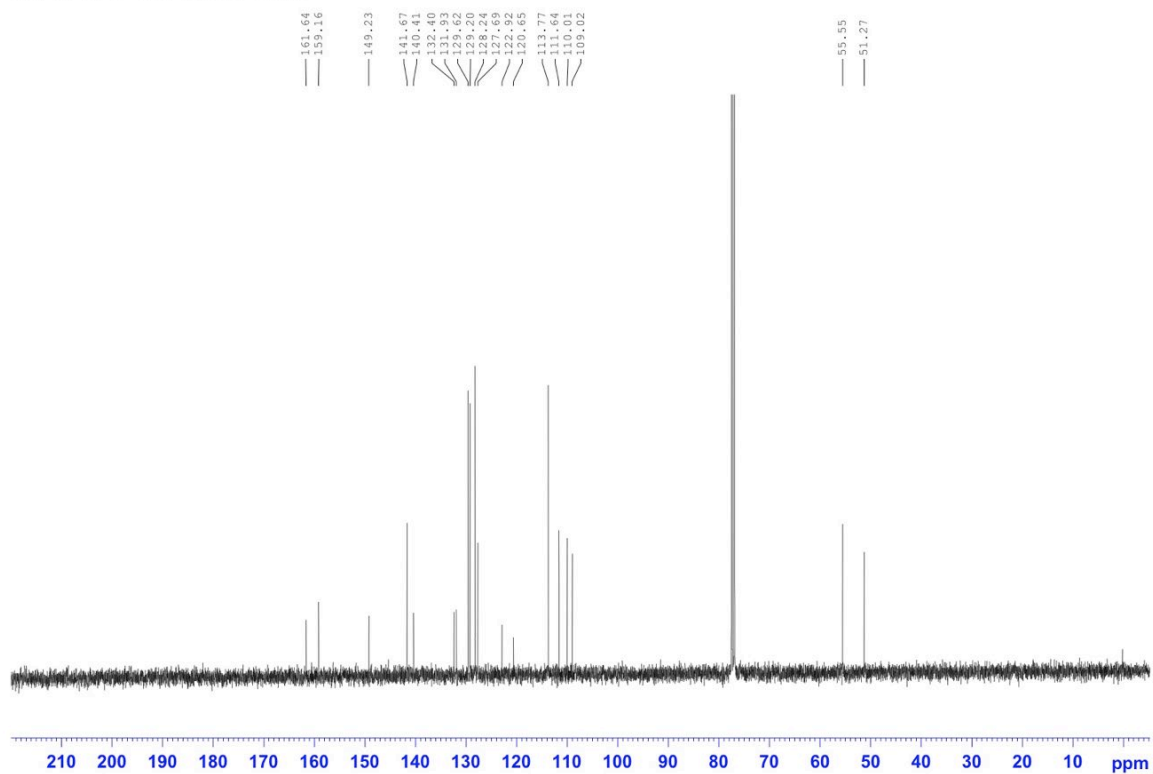



TWW-02-186, 1H BBF01, CDC13

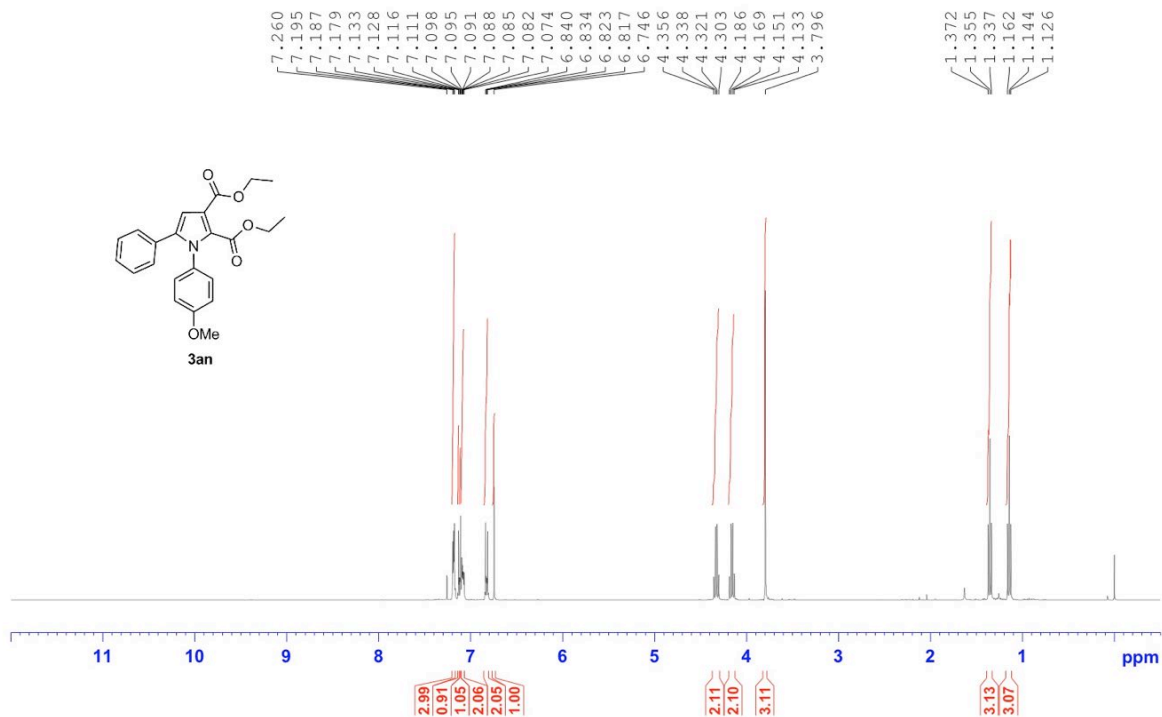

TWW-02-186, 13C BBF01, CDC13

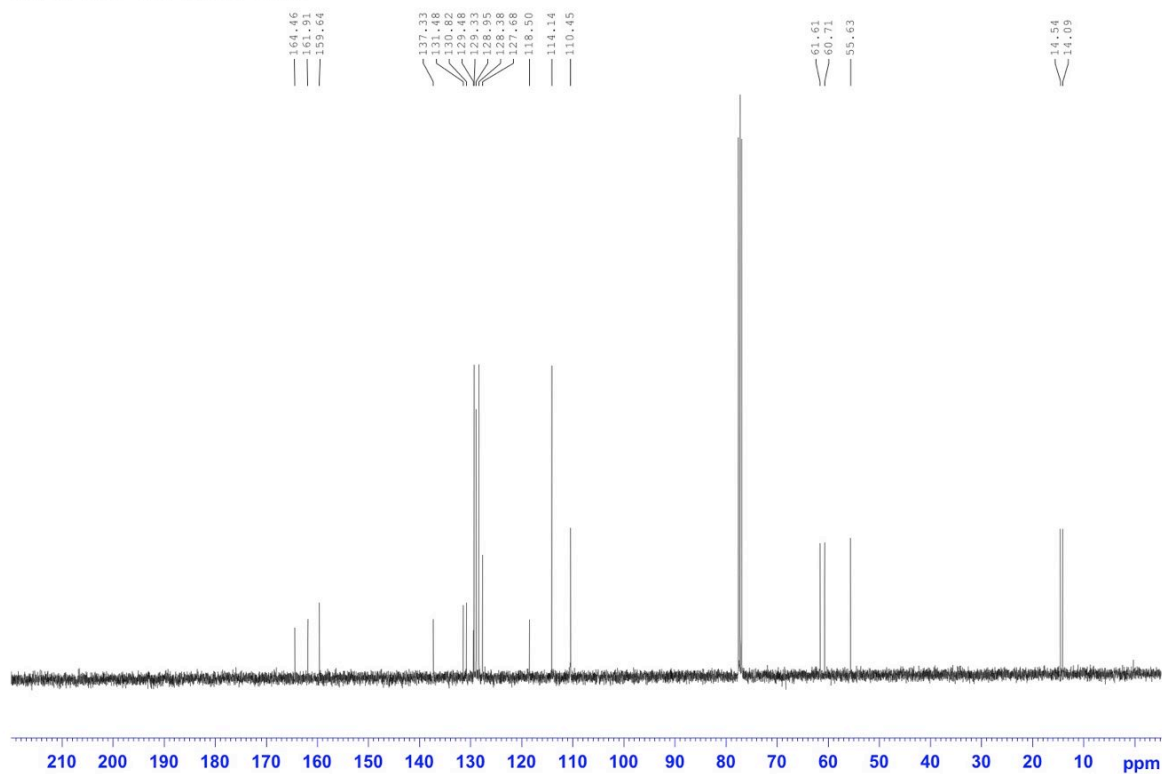

TWW-02-214, 1H, BBF01, CDC13

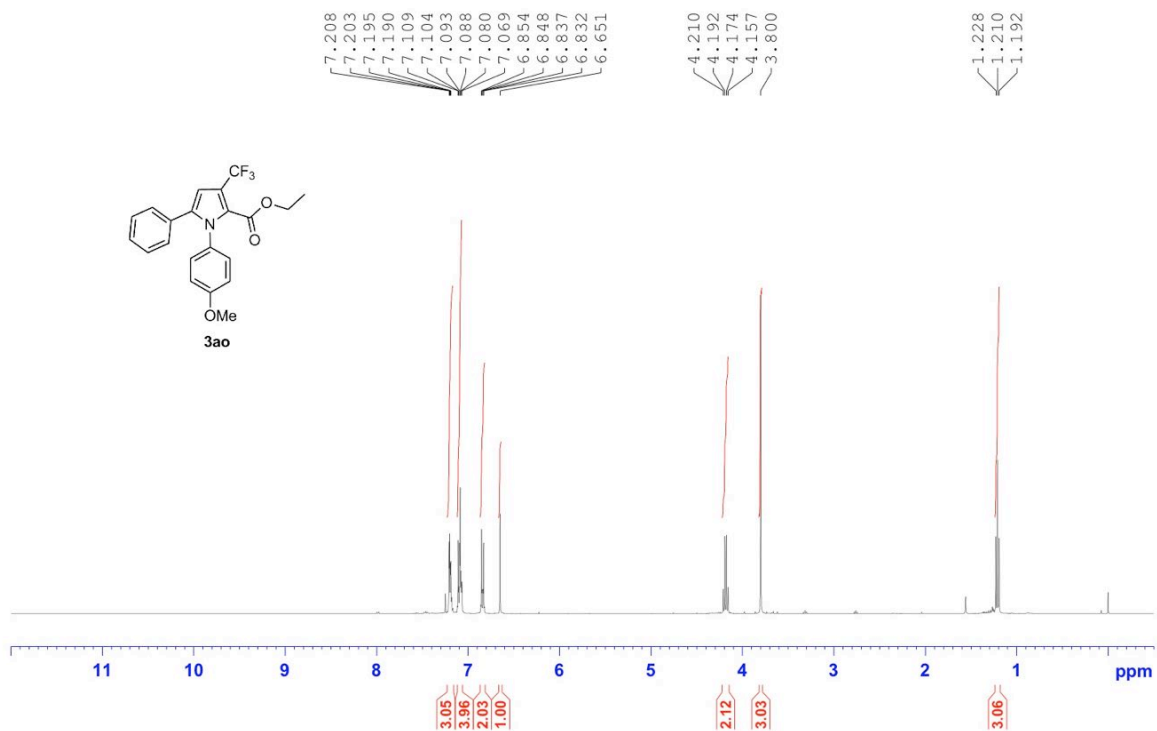

TWW-02-214, 13C, BBF01, CDC13

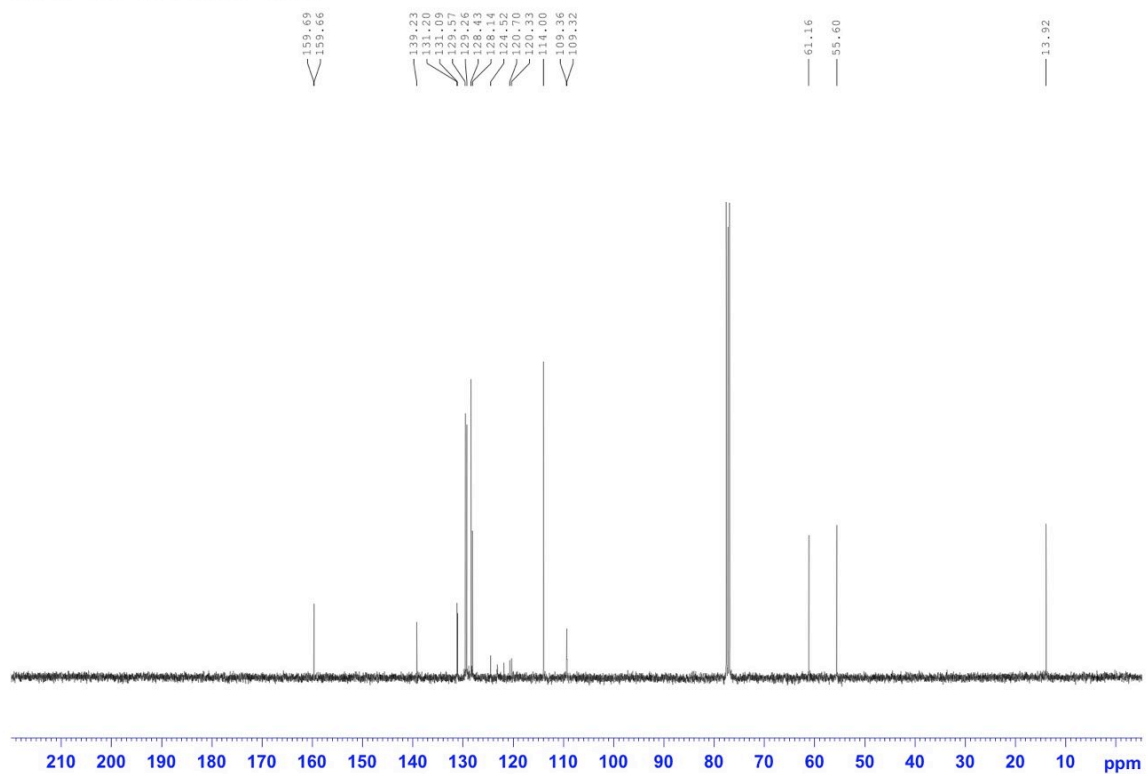

TWW-02-362-2 1HNMR  
BBF01 CDCl3

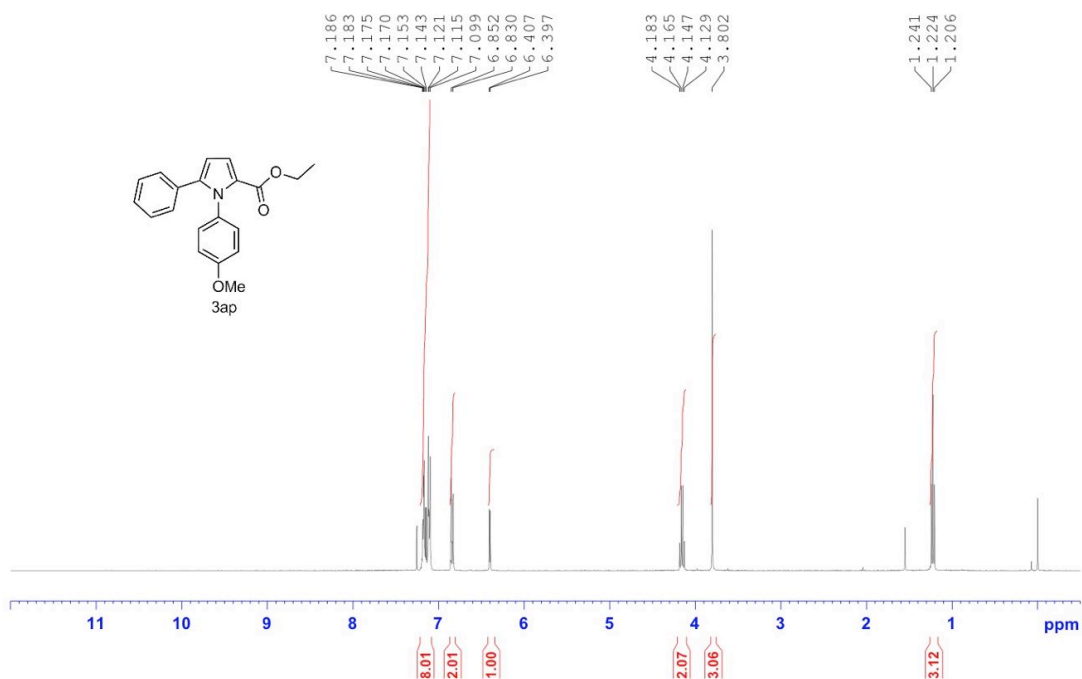

TWW-02-362-2 1HNMR  
BBF01 CDCl3

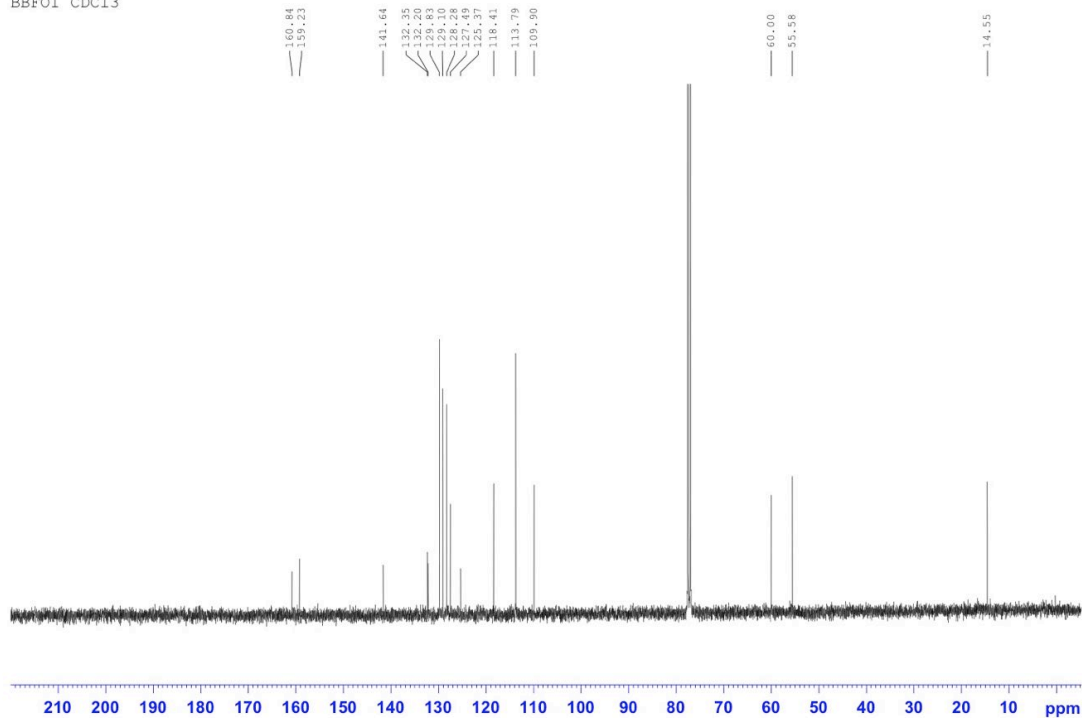

TWW-02-184-2, 1H BBOF1, CDCl3

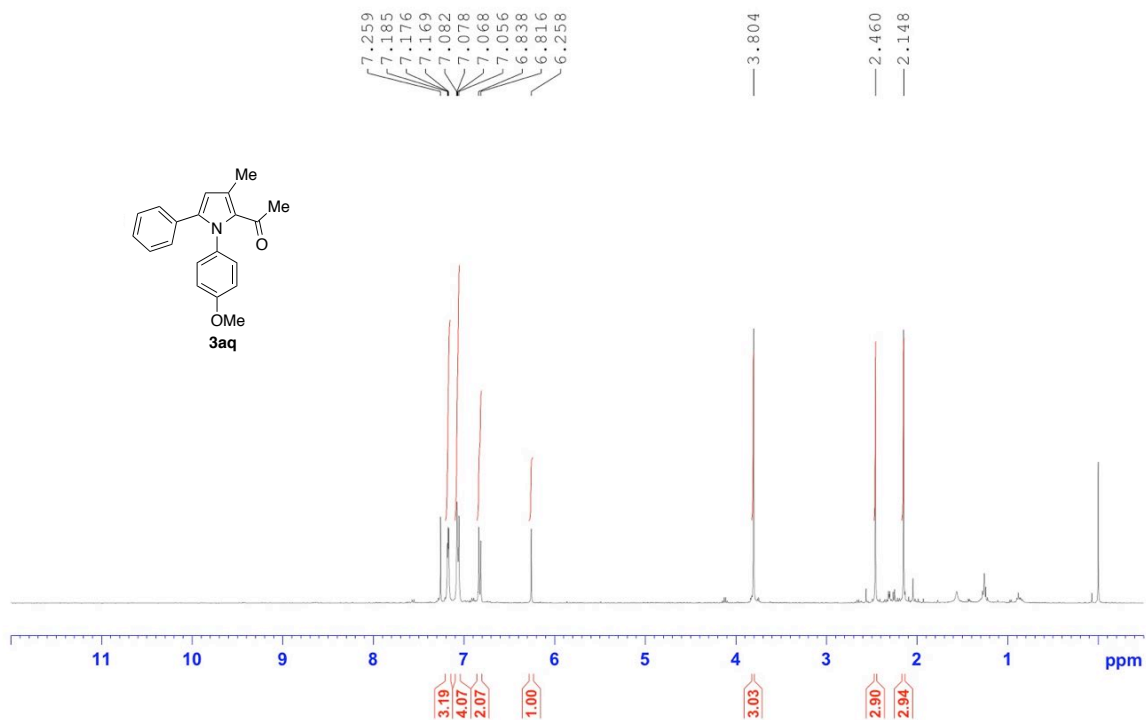

TWW-02-184-2x, 13C NMR, 400M Hz, BBFO2

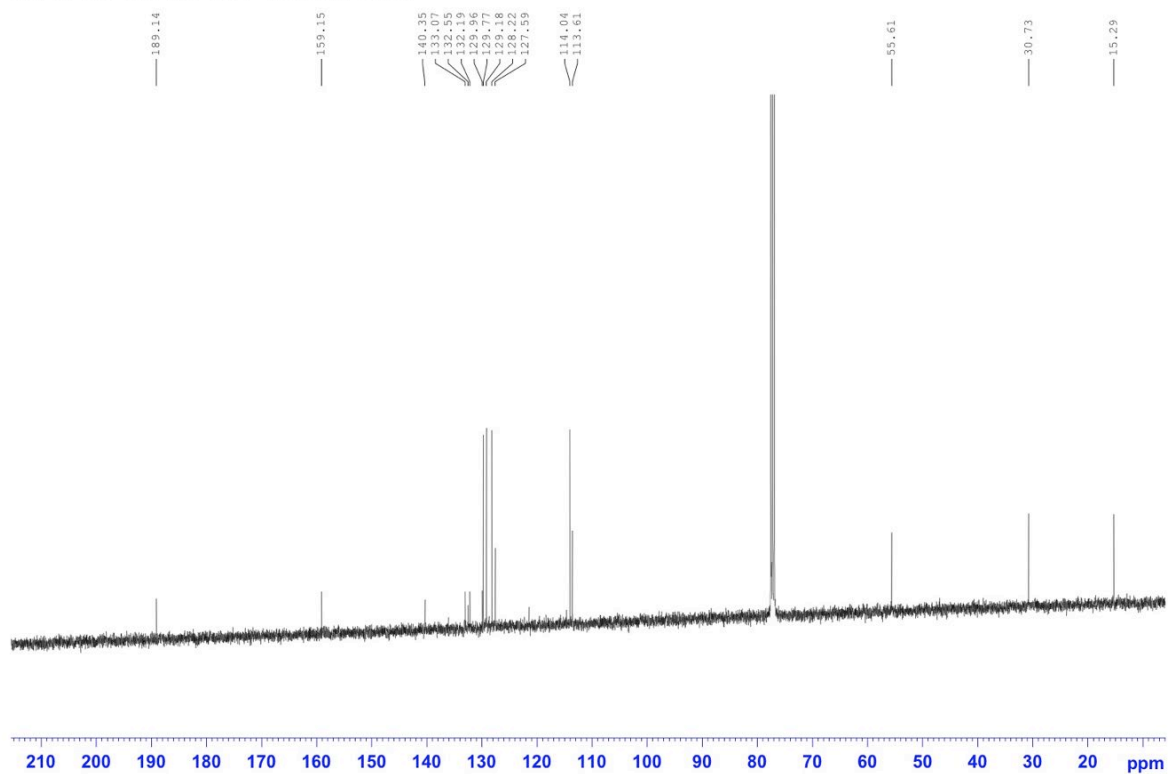

TWW-02-184-1, 1H BBF01, CDCl3

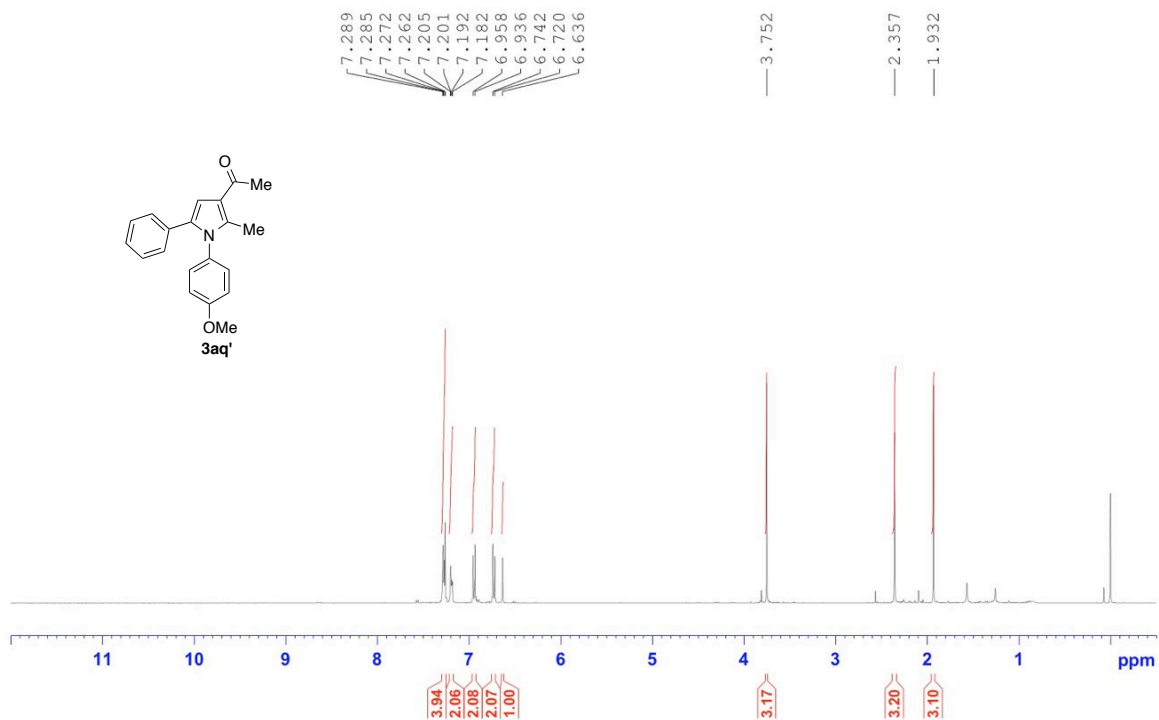

TWW-02-184-1x, 13C NMR, 400M Hz, BBF02

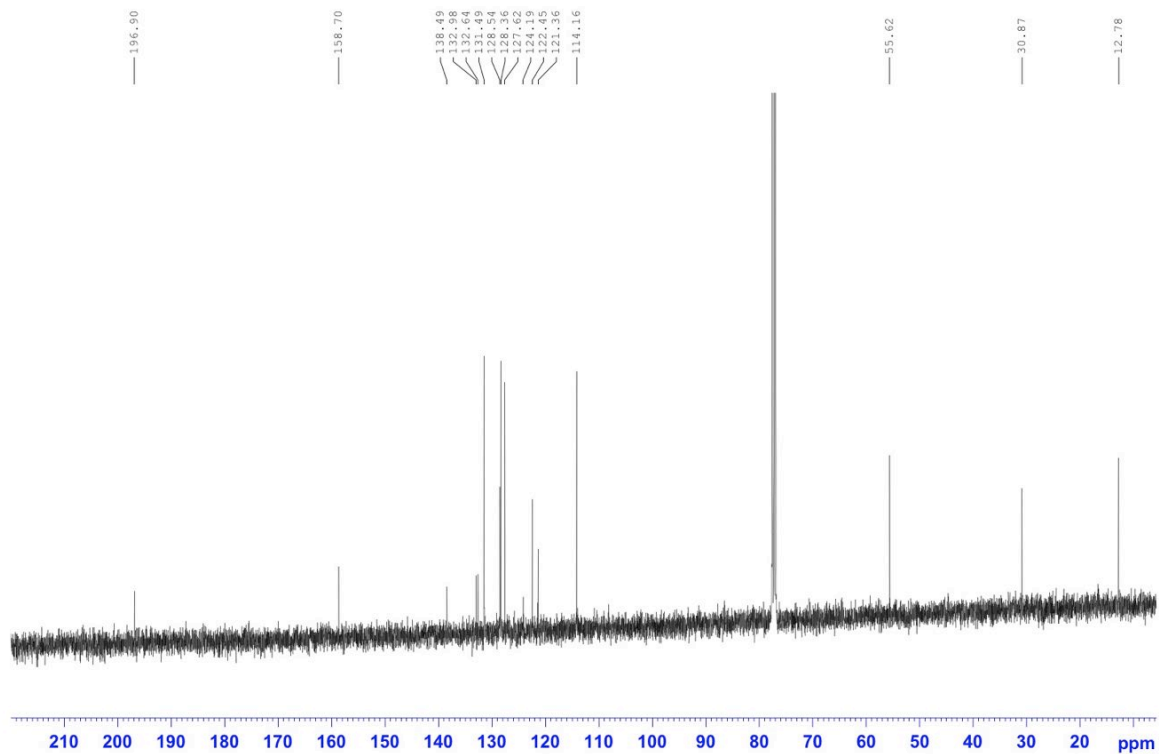

TWW-03-026-1, <sup>1</sup>H, CDCl<sub>3</sub>, BBF01

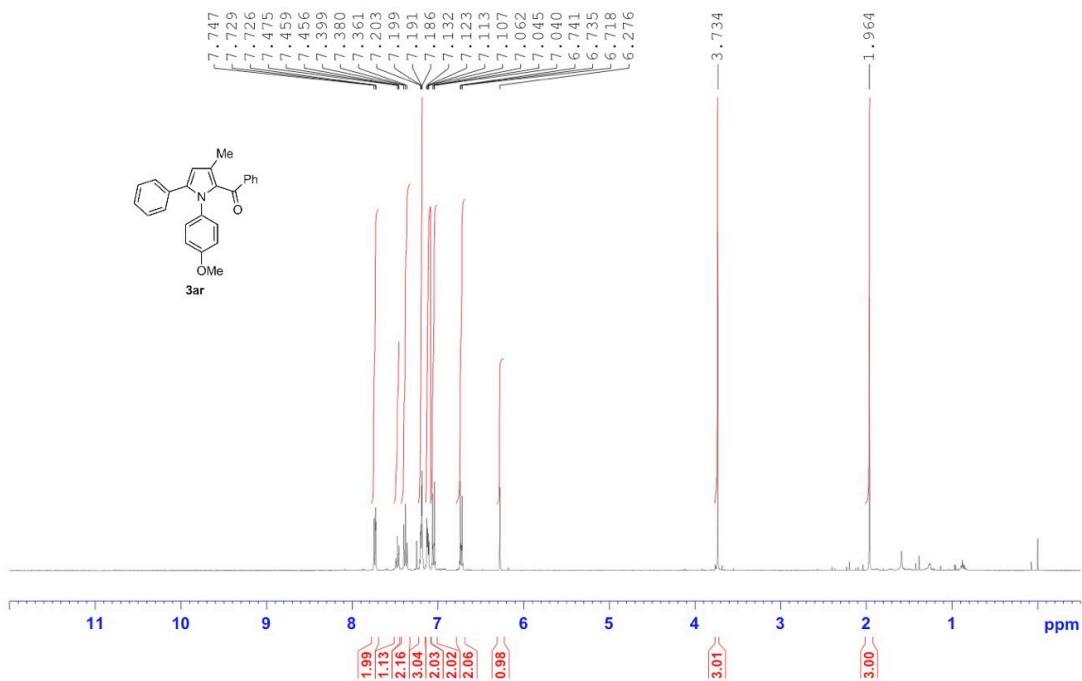

TWW-03-026-1, <sup>13</sup>C, CDCl<sub>3</sub>, BBF01

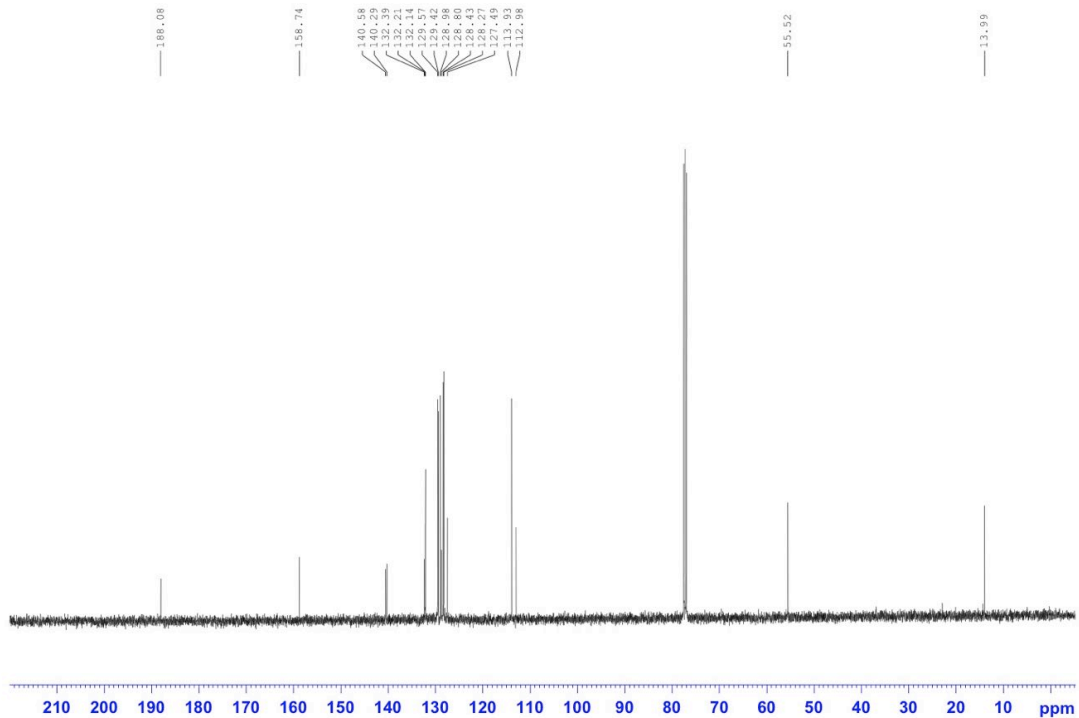

TWW-03-026-2, <sup>1</sup>H, CDCl<sub>3</sub>, BBF01

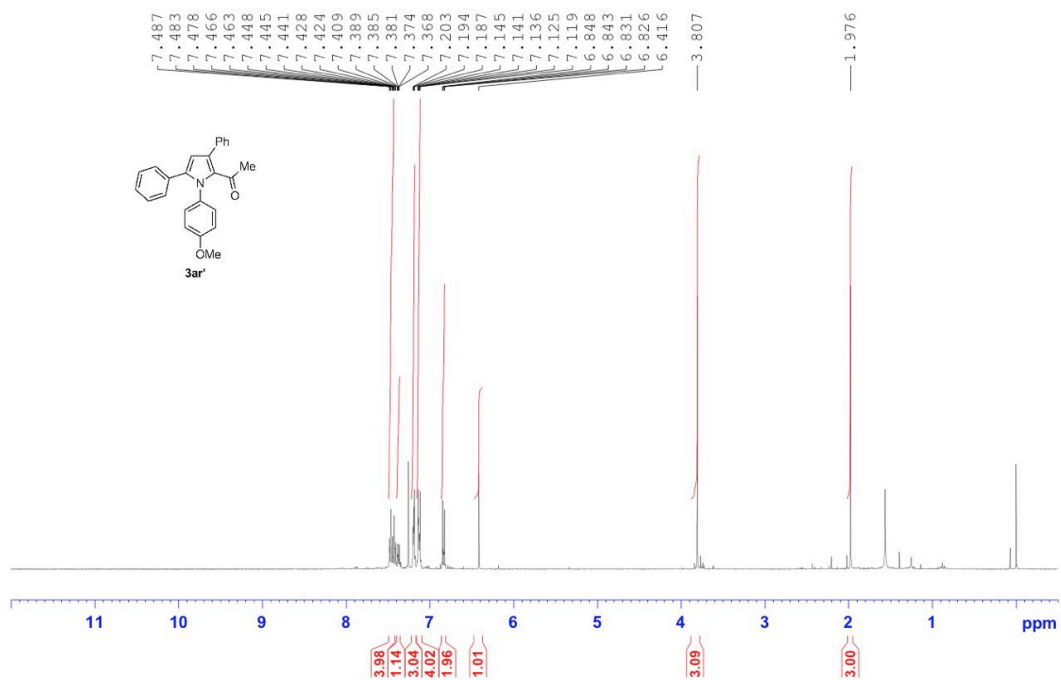

TWW-03-026-2, <sup>13</sup>C, CDCl<sub>3</sub>, BBF01

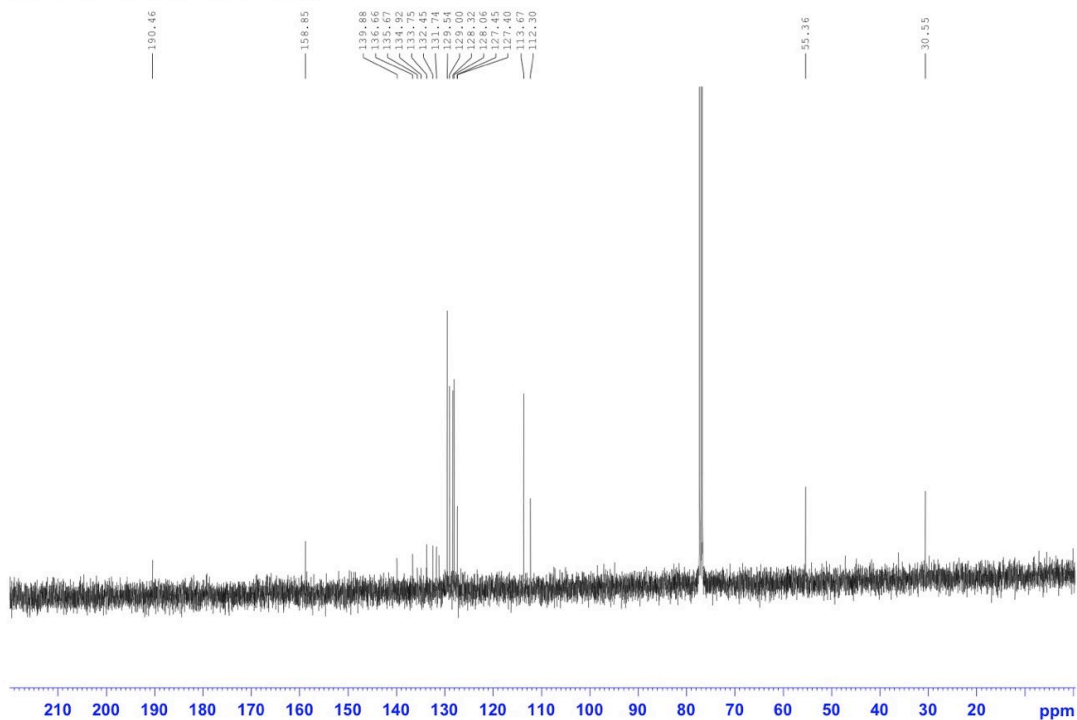

TWW-02-407x, 1H, BBF01, CDCl3

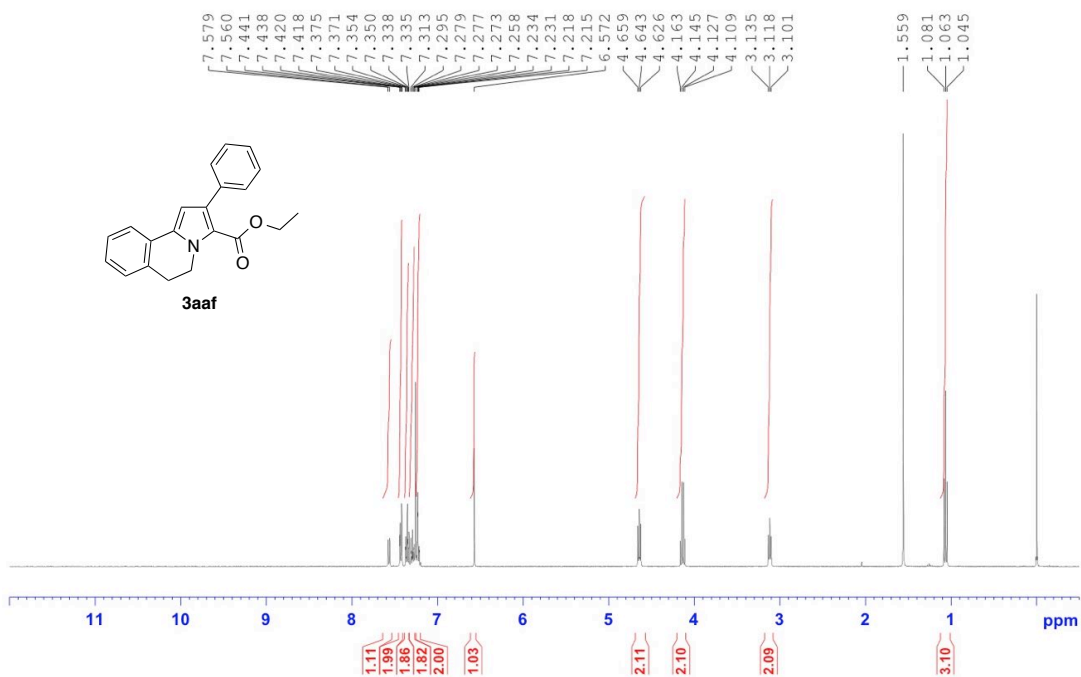

TWW-02-407, 13C, BBF01, CDCl3

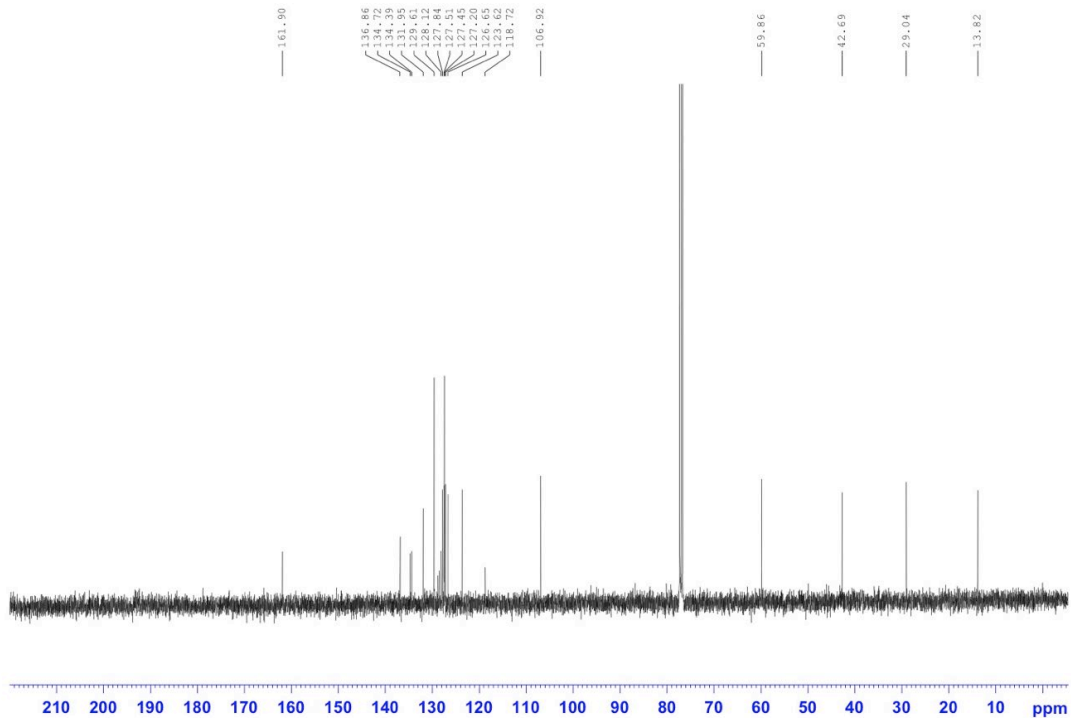



TWW-02-408x, 1H, BBF01, CDCl3

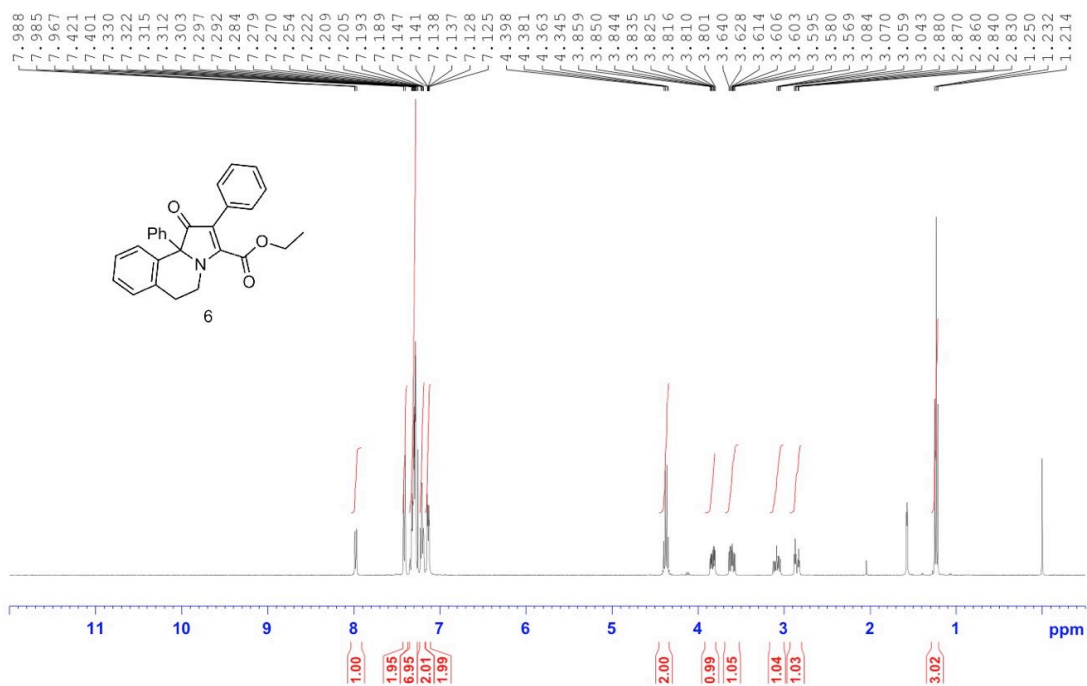

TWW-02-408x, 13C, BBF01, CDCl3

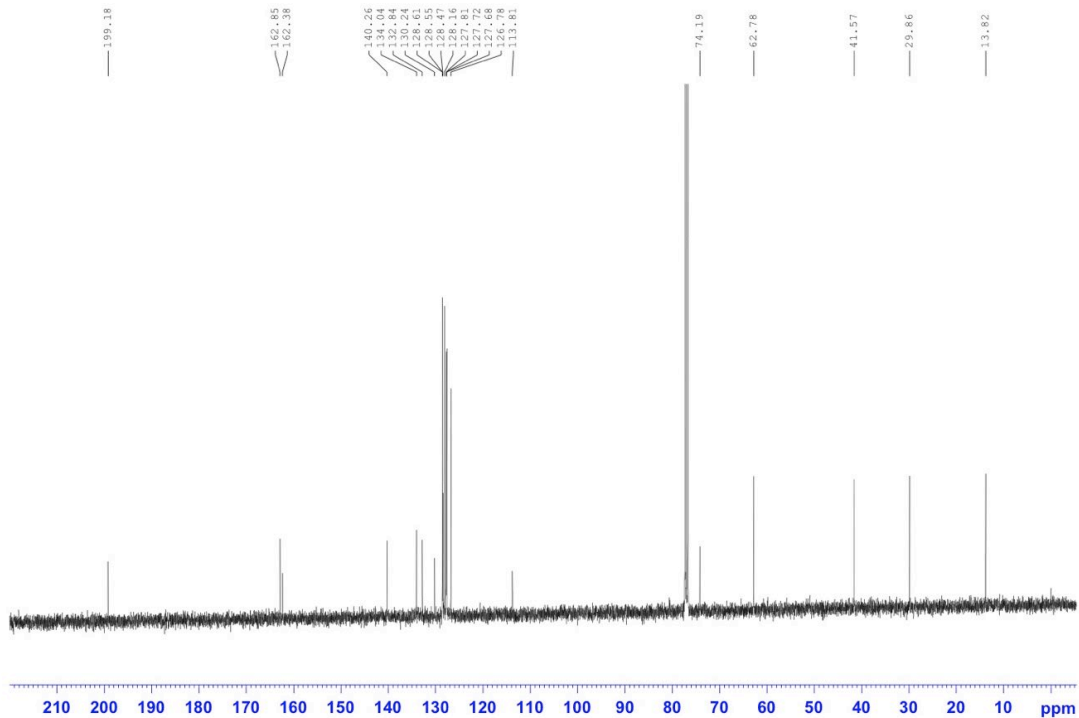

TWW-02-363 1HNMR  
BBF01 CDCl3

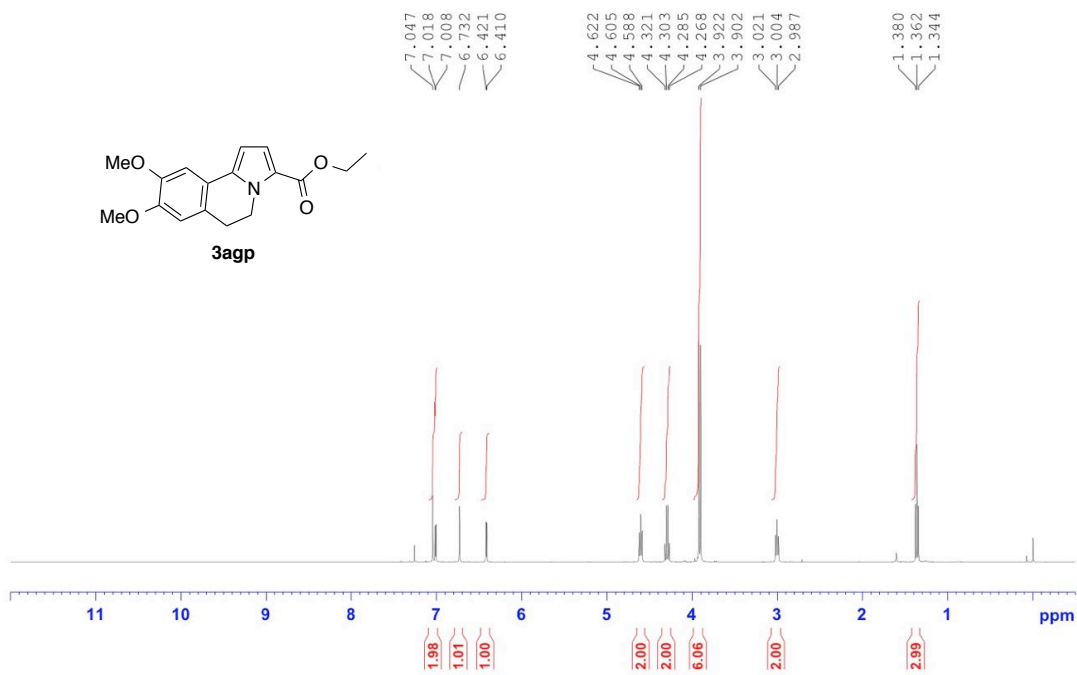

TWW-02-363 13CNMR  
BBF01 CDCl3

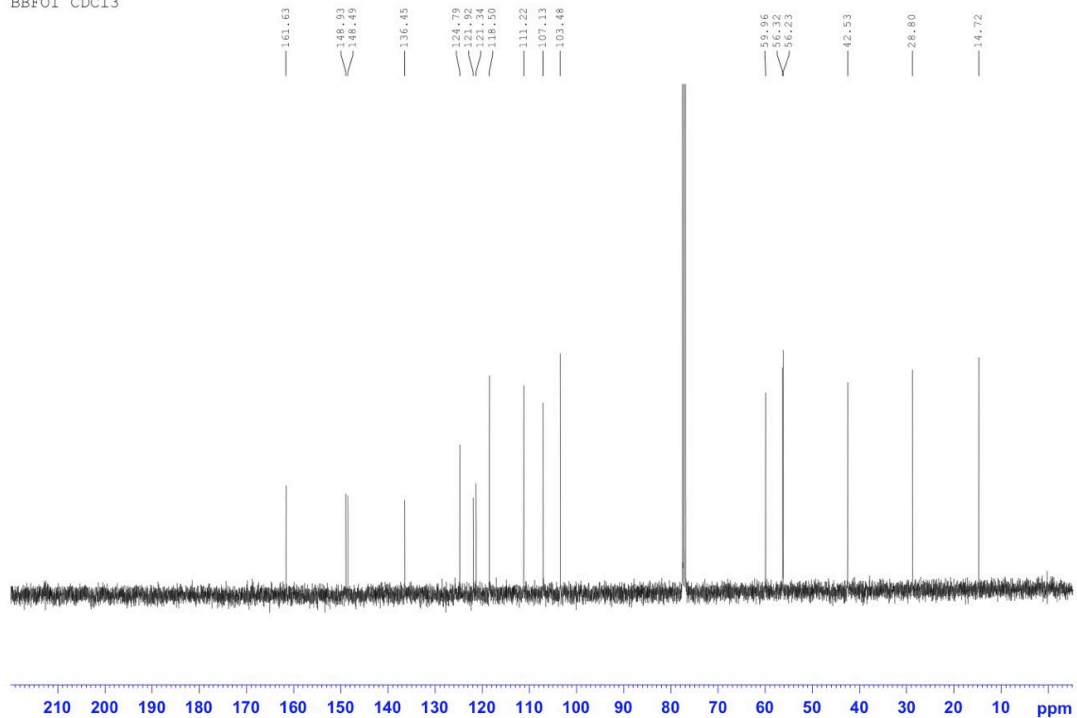

TWW-02-366 1HNMR  
BBF01 CDCl3

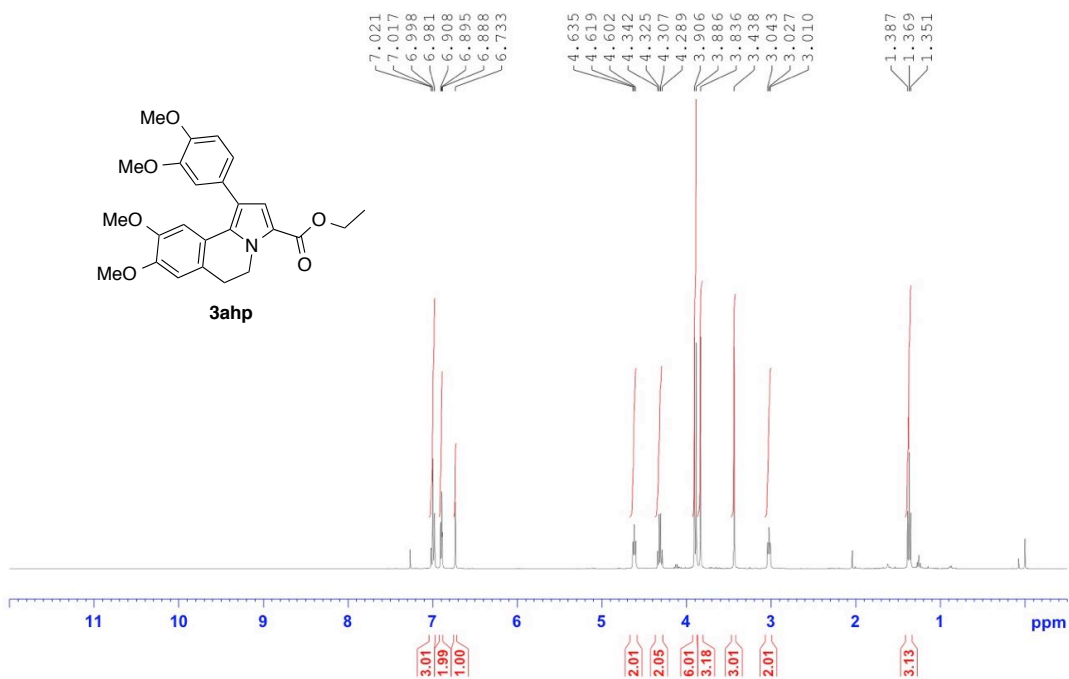

TWW-02-366 13CNMR  
BBF01 CDCl3

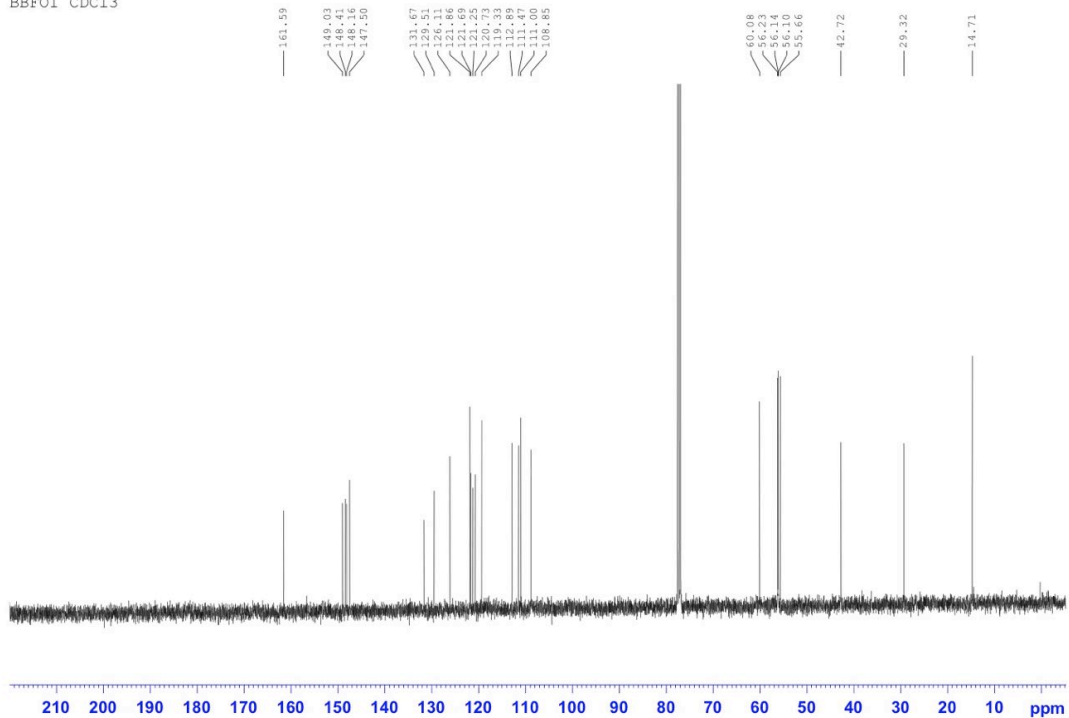

Supplement: c5sc02322j1.pdf [file c5sc02322j1.pdf]
